# Supplementary material for: Photoinduced halogen-bonding enabled synthesis of oxindoles and isoindolinones from aryl iodides
Source: Royal Society of Chemistry journal article supplement (doi:10.1039/d2ob01818g), 2022-11-17
Supplement: d2ob01818g1.pdf [file d2ob01818g1.pdf]

## *Supporting Information*

### **Photoinduced Halogen-Bonding Enabled Synthesis of Oxindoles and Isoindolinones from Aryl Iodides**

Wen-Xin Tang,<sup>†a</sup> Kun-Quan Chen,<sup>†b</sup> De-Qun Sun<sup>\*a</sup> and Xiang-Yu Chen<sup>\*b</sup>

<sup>a</sup> School of Life Science and Engineering, Southwest University of Science and Technology, Mianyang 621010, P. R. China. dqsun@swust.edu.cn,

<sup>b</sup> School of Chemical Sciences, University of Chinese Academy of Sciences, Beijing 100049 P. R. China. chenxiangyu20@ucas.ac.cn.

#### **Table of Contents**

|                                                                   |     |
|-------------------------------------------------------------------|-----|
| <b>1. General Information</b> .....                               | S2  |
| <b>2. Experimental Procedures</b> .....                           | S4  |
| <b>3. General Procedures</b> .....                                | S5  |
| <b>4. Mechanism Studies</b> .....                                 | S5  |
| 4.1 UV/Vis absorption spectrometry.....                           | S5  |
| 4.2 Control experiments .....                                     | S6  |
| 4.3 Determination of the Binding Ratio by Job's Plot. ....        | S7  |
| 4.4 Determination of the association constant ( $K_{EDA}$ ) ..... | S8  |
| <b>5. Compound Characterization Data</b> .....                    | S11 |
| <b>6. NMR Spectra</b> .....                                       | S21 |
| <b>7. Computational details</b> .....                             | S63 |
| <b>8. Reference</b> .....                                         | S68 |

## 1. General Information

- Chemicals were purchased from Heowns, Innochem and Bidepharm, and they were used without further purification unless otherwise noted. The starting materials aryl iodides were readily prepared according to the related literatures.<sup>1</sup> Solvents were purified using a solvent-purification system (VSPS-8, Vigor).
- Chromatographic purification of the products was performed on 200-300 mesh silica gel.
- IR spectra were taken on a Vertex 70 spectrophotometer and reported as wave numbers ( $\text{cm}^{-1}$ ).
- UV/vis absorption spectra were acquired on a UV-5 spectrophotometer (METTLER TOLEDO).
- The GC-MS TQ8040 was used in the detection of the reaction mixture.
- The SGW X-4 was used to measure the melting point of solids.
- HRMS were obtained on an IonSpec FT-ICR mass spectrometer with ESI resource. The mass analysis mode of the HRMS was orbitrap.
- <sup>1</sup>H-, <sup>19</sup>F- and <sup>13</sup>C- NMR spectra were recorded at ambient temperature on a Shimadzu Avance 400 Spectrometer and Shimadzu Avance 500 Spectrometer. The chemical shifts are reported in ppm downfield of tetramethylsilane (TMS) and referenced to residual solvent peaks resonance as the internal standard. The order of citation in parentheses is a) multiplicity (s = singlet, d = doublet, t = triplet, q = quartet, dd = doublet of doublet, ddd = doublet of doublet of doublet, m = multiplet), b) coupling constants, c) number of protons. Coupling constants (*J*) are reported in Hertz (Hz).
- Photochemical experiments were performed magnetically stirred in 10 mL glass tubes, sealed with a rubber septum. The tubes were irradiated with blue light (450 nm) using a LED lamp (kelo-A0100s blue LED). The distance from the light source to the irradiation vessel was 2 cm and a fan was used to keep the reaction temperature at  $50 \pm 5$  °C. (The purchase link for LED lamp is <https://item.jd.com/52714507033.html>)

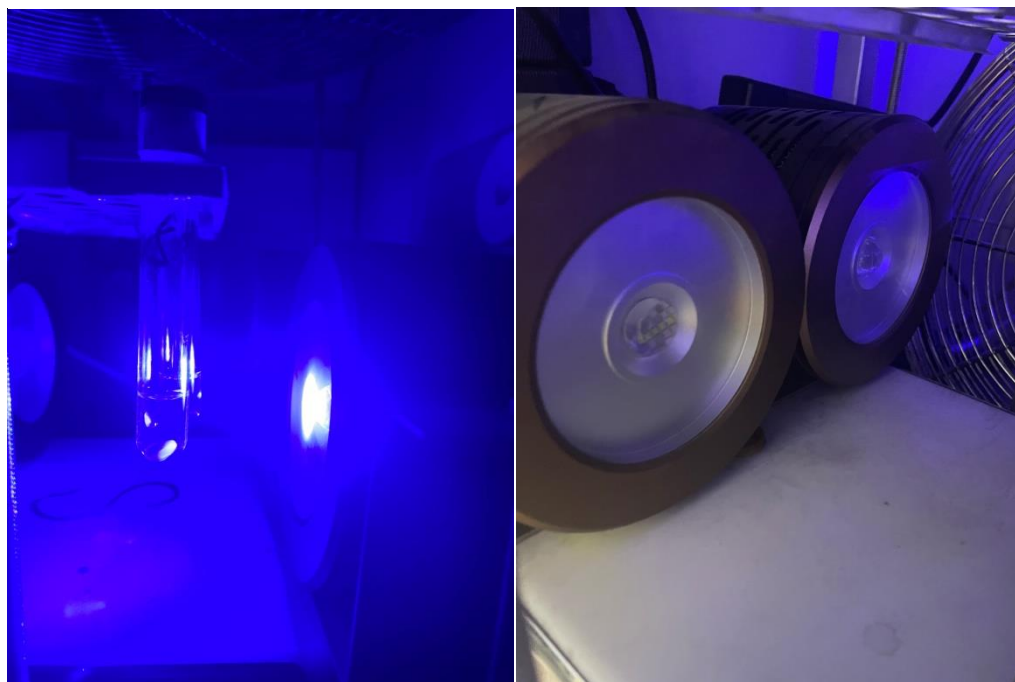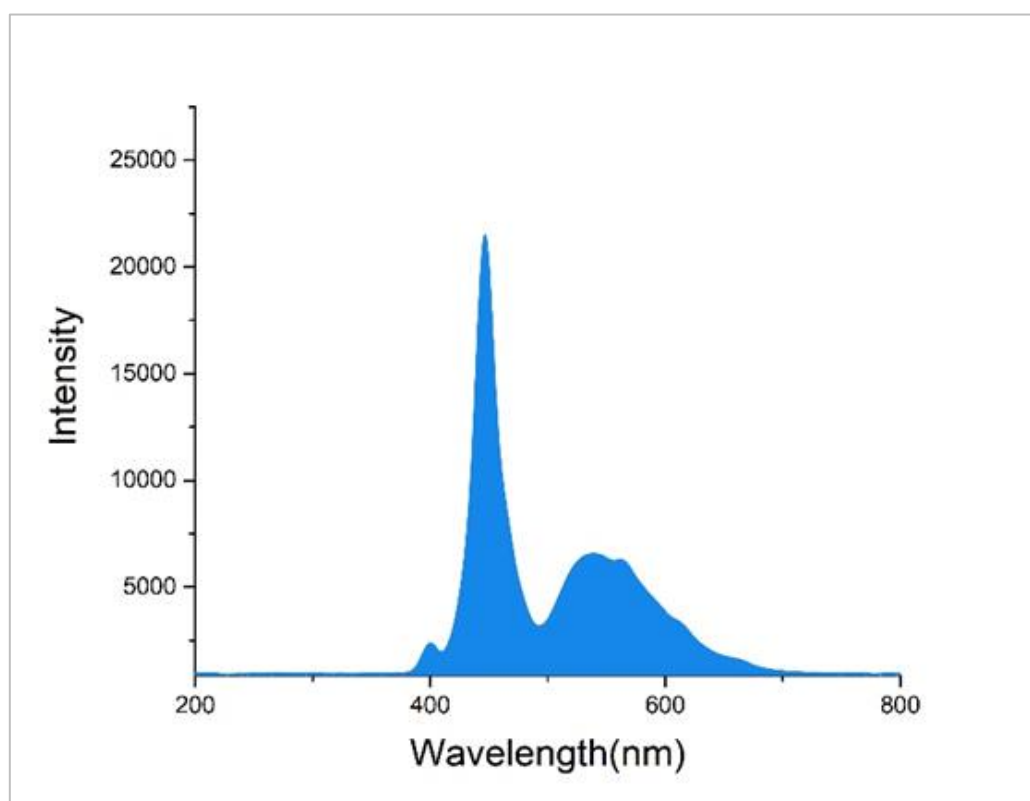

**Figure S1.** The spectra of blue LEDs employed in the reaction.

## 2. Experimental Procedures

### Scheme S1. Optimization of the reaction conditions.

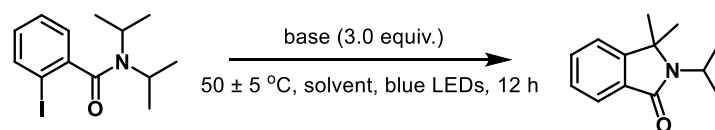

| Entry           | Base                                | Solvent           | Yield/% <sup>a</sup> |
|-----------------|-------------------------------------|-------------------|----------------------|
| 1               | DBU                                 | DMF               | 88                   |
| 2               | DBU                                 | THF               | 85                   |
| 3               | DBU                                 | MeCN              | 75                   |
| 4               | DBU                                 | DMA               | 81                   |
| 5               | DBU                                 | Et <sub>2</sub> O | 31                   |
| 6               | DBU                                 | toluene           | 17                   |
| 7               | DBU                                 | acetone           | trace                |
| 8               | DBU                                 | DCE               | 28                   |
| 9               | TMEDA                               | DMF               | trace                |
| 10              | DIPEA                               | DMF               | 20                   |
| 11              | NEt <sub>3</sub>                    | DMF               | trace                |
| 12              | DABCO                               | DMF               | trace                |
| 13              | K <sub>2</sub> CO <sub>3</sub>      | DMF               | trace                |
| 14              | Na <sub>2</sub> CO <sub>3</sub>     | DMF               | trace                |
| 15              | Cs <sub>2</sub> CO <sub>3</sub>     | DMF               | trace                |
| 16              | K <sub>3</sub> PO <sub>4</sub>      | DMF               | trace                |
| 17              | K <sub>2</sub> HPO <sub>4</sub>     | DMF               | trace                |
| 18              | None                                | DMF               | NR                   |
| 19 <sup>b</sup> | DBU/Cs <sub>2</sub> CO <sub>3</sub> | DMF               | 79                   |
| 20              | 1,2-diphenyldisulfane               | DMF               | trace                |
| 21              | triphenylphosphine                  | DMF               | trace                |
| 22              | triphenylphosphine oxide            | DMF               | trace                |
| 23              | sodium benzenethiolate              | DMF               | 74                   |

<sup>a</sup> Yield of isolated product. <sup>b</sup> 0.2 equiv. of DBU and 3 equiv. of Cs<sub>2</sub>CO<sub>3</sub> were added.

### Scheme S2. Controlled experiments

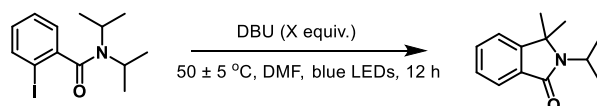

| Entry | X equiv. | Yield/% <sup>a</sup> |
|-------|----------|----------------------|
| 1     | 0        | NR                   |
| 2     | 0.2      | trace                |
| 3     | 1.5      | 61                   |
| 4     | 2.0      | 76                   |

<sup>a</sup> Yield of isolated product.

### 3. General Procedures

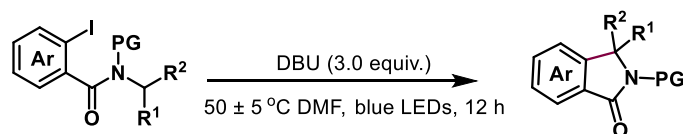

**General procedure A:** In a nitrogen atmosphere, to a dry tube equipped with a stirring bar, the *o*-iodo-benzamide derivatives (0.2 mmol, 66.2 mg), DBU (0.6 mmol, 69.6 mg, 90.3  $\mu$ L) and DMF (2.0 mL) were added, the mixture was stirred under a 100 W blue LED (450 nm) lamp with an interval of 2 cm from the lamp and a fan was used to keep the reaction temperature at 50 ± 5 °C. After 12 hours, the reaction mixture was subjected to silica gel chromatography to afford the desired product (PE/EA = 10:1 – 30:1).

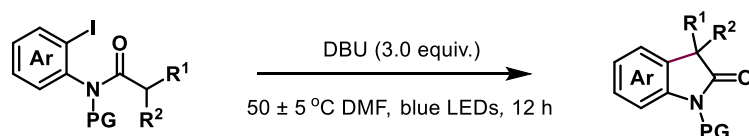

**General procedure B:** In a nitrogen atmosphere, to a dry tube equipped with a stirring bar, the *o*-iodoaniline derivatives (0.2 mmol, 66.2 mg), DBU (0.6 mmol, 69.6 mg, 90.3  $\mu$ L) and DMF (2.0 mL) were added, the mixture was stirred under a 100 W blue LED (450 nm) lamp with an interval of 2 cm from the lamp and a fan was used to keep the reaction temperature at 50 ± 5 °C. After 12 hours, the reaction mixture was subjected to silica gel chromatography to afford the desired product (PE/EA = 10:1 – 30:1).

### 4. Mechanism Studies

#### 4.1 UV/Vis absorption spectrometry

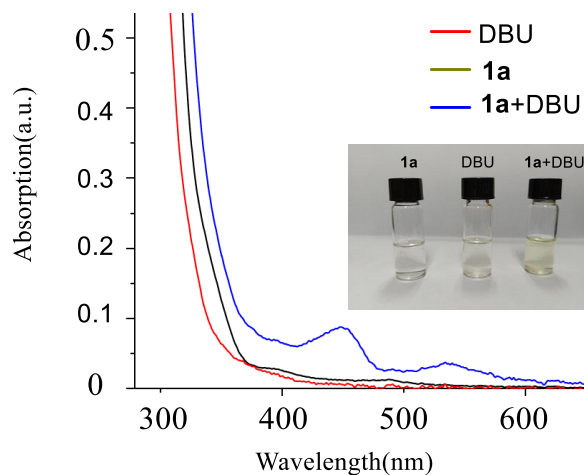

**Figure S2:** Absorption spectra of substrate **1a**, DBU and their mixture. The UV/vis spectra of *N*-(2-iodophenyl)-*N*-isopropylisobutyramide **1a** (0.1 M in DMF), DBU (0.3 M in DMF).

## 4.2 Control experiments

A) radical inhibition study

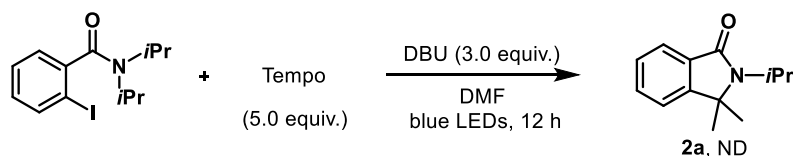

B) crucial role of XB for the generation of aryl radical

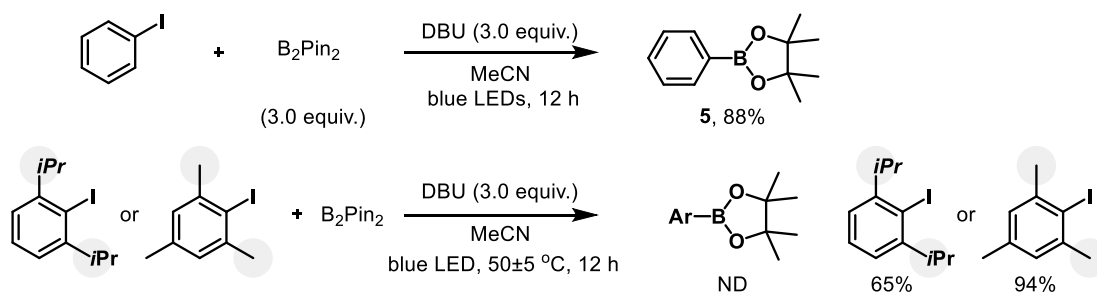

**Figure S3.** A) radical inhibition study; B) control experiment.

In a nitrogen-filled glove box, a 10-mL vial equipped with a magnetic stirring bar was charged the 2-iodo-benzamide (0.2 mmol, 1.0 equiv.), TEMPO (1.0 mmol, 5.0 equiv.) and DMF (2.0 mL). The vial was closed and removed from the glove box. The resulting mixture was allowed to stir at  $50 \pm 5$  °C under blue LED (100 W) irradiation for overnight. The trapped radical species was detected by HRMS (Figure S3A).

**HRMS (ESI):**  $m/z$  [M+H]<sup>+</sup> calcd for  $C_{18}H_{34}ON_3$ : 308.2696; found 308.2692.

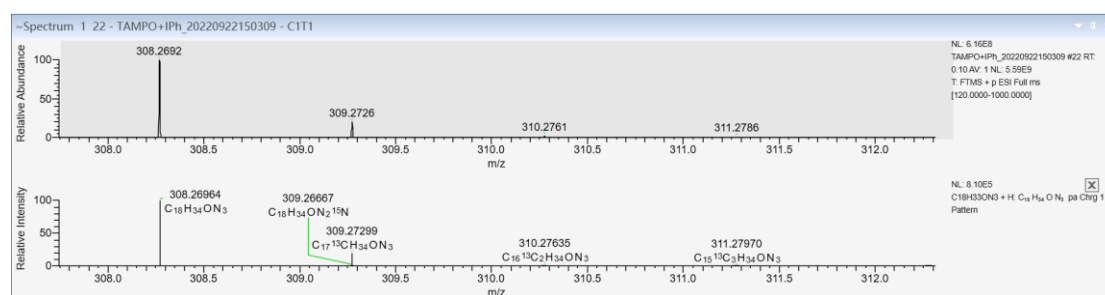

In a nitrogen-filled glove box, a 10-mL vial equipped with a magnetic stirring bar was charged sequentially with iodobenzene (0.2 mmol, 1.0 equiv.), DBU (0.6 mmol, 3.0 equiv.),  $B_2pin_2$  (0.6 mmol, 3.0 equiv.) and DMF (2.0 mL). The vial was closed and removed from the glove box. The resulting mixture was allowed to stir at  $50 \pm 5$  °C under blue LED (100 W) irradiation for overnight. Their products were obtained in 88% yield by H NMR spectroscopy. In a nitrogen-filled glove box, a 10-mL vial equipped with a magnetic stirring bar was charged sequentially with

2-iodo-1,3-diisopropylbenzene or 2-iodo-1,3,5-trimethylbenzene (0.2 mmol, 1.0 equiv.), DBU (0.6 mmol, 3.0 equiv.), B<sub>2</sub>pin<sub>2</sub> (0.6 mmol, 3.0 equiv.) and DMF (2.0 mL). The vial was closed and removed from the glove box. The resulting mixture was allowed to stir at 50 ± 5 °C under blue LED (100 W) irradiation for overnight. The starting material 2-iodo-1,3-diisopropylbenzene or 2-iodo-1,3,5-trimethylbenzene were recovered in 65% and 94% yield respectively. (Figure S3B).

### 4.3 Determination of the Binding Ratio by Job's Plot.

The binding stoichiometry between **1a** and DBU was evaluated using Job's plot analysis<sup>5</sup>: <sup>1</sup>H NMR spectra of ten samples of mixtures of **1a** and DBU acceptor in CDCl<sub>3</sub> were recorded at 298 K. The total volume of the mixture was 0.5 mL, and the total amount of **1a** and DBU was kept constant at 0.1 mmol (0.2 M), while the amount of DBU varied from 0 to 0.1 mmol (0-0.2 M). The molar ratios of DBU / (**1a** + DBU) were 0, 0.1, 0.2, 0.3, 0.4, 0.5, 0.7, 0.8, 0.9, 1.0. <sup>1</sup>H NMR for each sample was recorded and the chemical shifts differences (Δδ) for **1a** were used to draw the plot. The stoichiometry was determined by plotting ratios of [**1a**] × Δδ against ratios of [**1a**] / [**1a** + DBU] to afford a maximum at ratio [**1a**] / [**1a** + DBU] = 0.5, which meant a 1:1 complex ratio between **1a** and DBU. (Figure S3).

|    | [ <b>1a</b> ] (M) | Δδ (ppm) | [ <b>1a</b> ] / [ <b>1a</b> + DBU] | [ <b>1a</b> ] × Δδ (M.ppm) |
|----|-------------------|----------|------------------------------------|----------------------------|
| 1  | 0.10              | 0        | 1.00                               | 0                          |
| 2  | 0.09              | 0.0072   | 0.90                               | 0.001296                   |
| 3  | 0.08              | 0.0089   | 0.80                               | 0.001424                   |
| 4  | 0.07              | 0.0133   | 0.70                               | 0.001862                   |
| 5  | 0.05              | 0.0197   | 0.50                               | 0.001970                   |
| 6  | 0.04              | 0.0200   | 0.40                               | 0.001600                   |
| 7  | 0.03              | 0.0213   | 0.30                               | 0.001278                   |
| 8  | 0.02              | 0.0266   | 0.20                               | 0.001064                   |
| 9  | 0.01              | 0.0279   | 0.10                               | 0.000558                   |
| 10 | 0                 | 0        | 0                                  | 0                          |

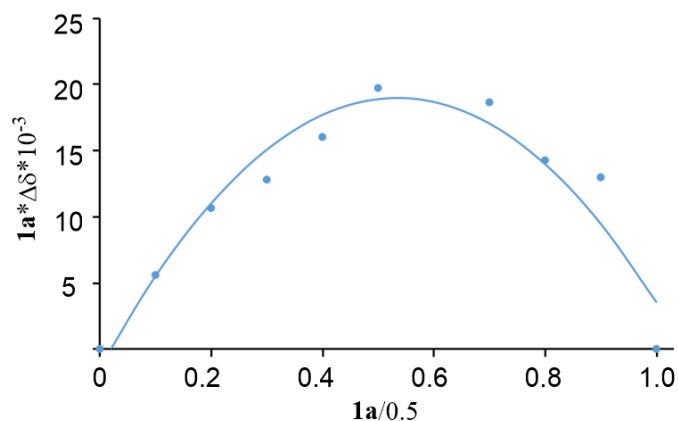

**Figure S3.** Job plot was used to determine binding stoichiometry between **1a** and DBU.

#### 4.4 Determination of the association constant ( $K_{EDA}$ )

The association constant ( $K_{EDA}$ ) was calculated using Hanna and Ashbaugh's<sup>2-5</sup>.  $^1\text{H NMR}$  spectra of ten samples of mixtures of **1a** and DBU in  $\text{CDCl}_3$  were recorded at 298 K. The total volume of the mixture was 0.5 mL, the amount of **1a** was kept constant at 0.02 mmol (6.62 mg), while that of DBU varied from 0.04 to 0.4 mmol.  $^1\text{H NMR}$  for each sample was recorded and the chemical shifts differences ( $\Delta\delta$ ) for **1a** were used to draw the plot. While TMEDA and DIPEA made the curves according to the above method.

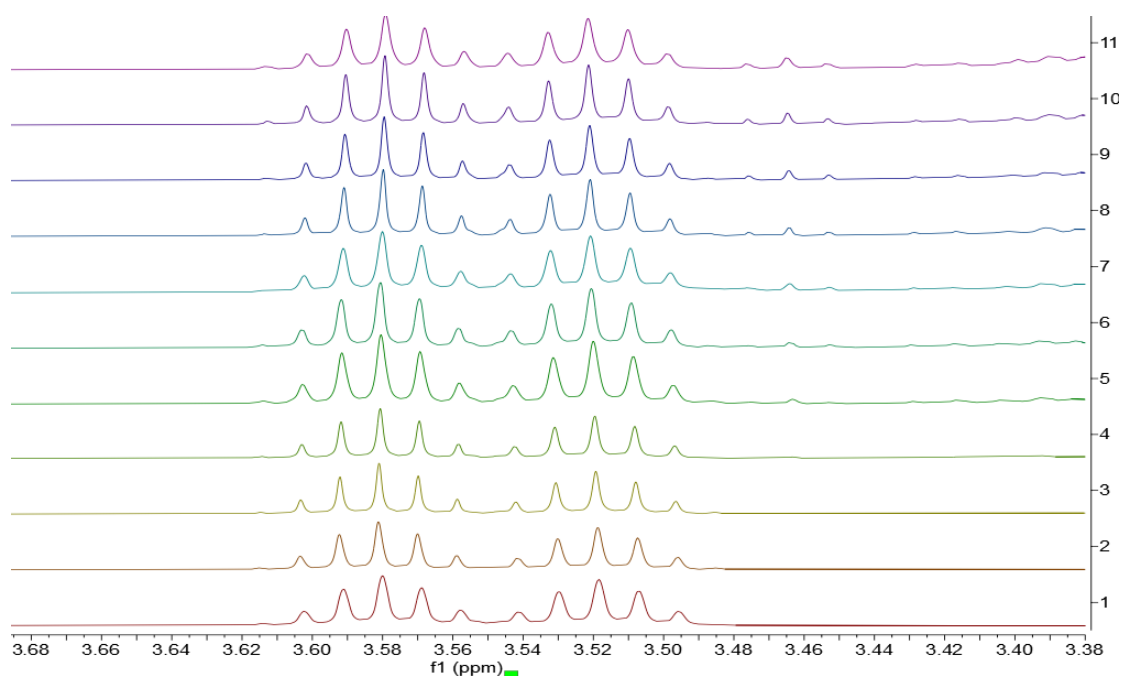

**Figure S4.**  $^1\text{H NMR}$  spectra recorded during the titration of **1a** ( $4 \times 10^{-2}$  M) with variable concentrations (0-10 equiv.) of DBU in Chloroform-*d*.



Filter: NMR 1:1 Fit Summary Save

## Details

Time to fit 0.3064 s  
 SSR 2.7434e-7  
 Fitted datapoints 10  
 Fitted params 2

## Parameters

| Parameter (bounds) | Optimised            | Error      | Initial              |
|--------------------|----------------------|------------|----------------------|
| K (0 → ∞)          | 1.08 M <sup>-1</sup> | ± 9.5972 % | 1.00 M <sup>-1</sup> |

Back

Next

Welcome! BindFit is currently under

Fits Molefractions Details

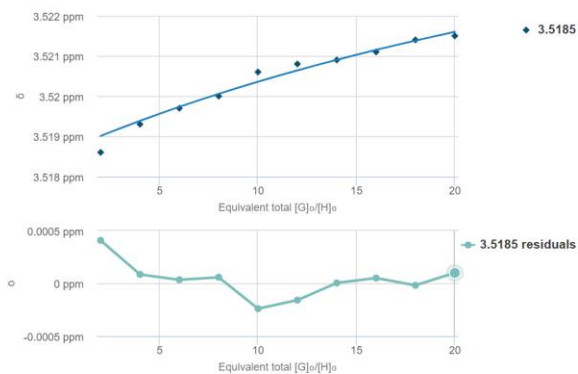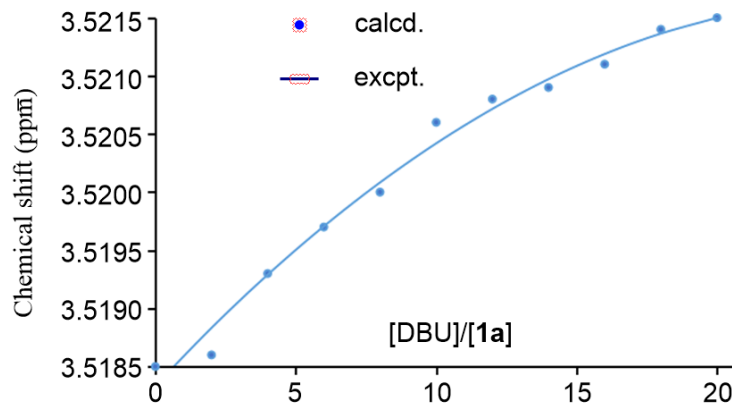

Filter: NMR 1:1 Fit Summary Save

## Details

Time to fit 0.2881 s  
 SSR 3.1421e-4  
 Fitted datapoints 10  
 Fitted params 2

## Parameters

| Parameter (bounds) | Optimised               | Error      | Initial               |
|--------------------|-------------------------|------------|-----------------------|
| K (0 → ∞)          | 3.78e-5 M <sup>-1</sup> | ± 1.6237 % | 12.00 M <sup>-1</sup> |

Back

Next

Welcome! BindFit is currently under development. Although we do our best to test

Fits Molefractions Details

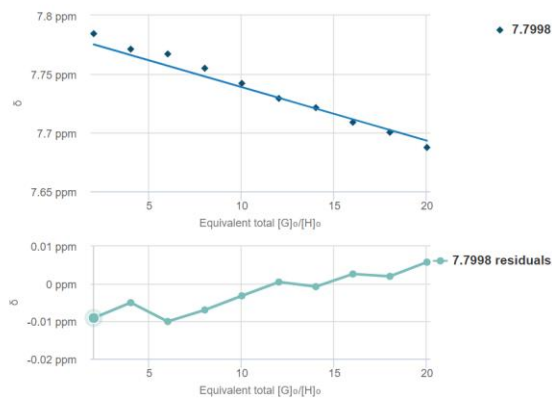

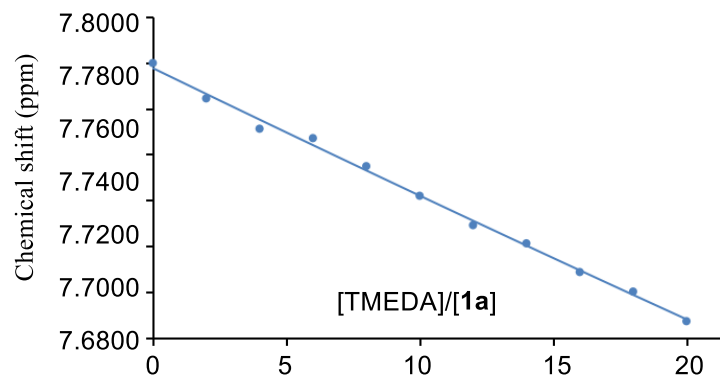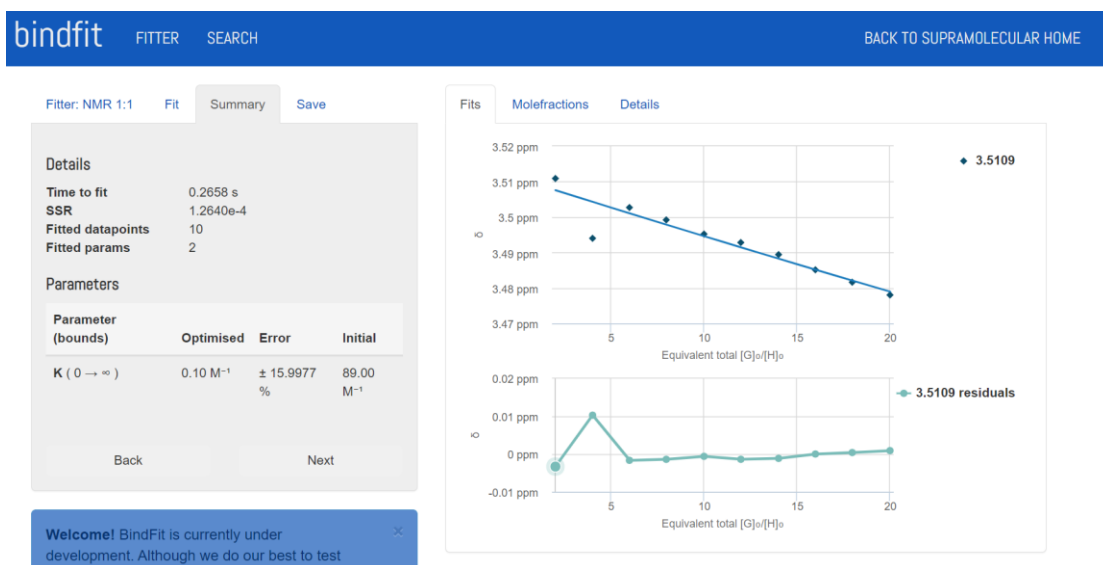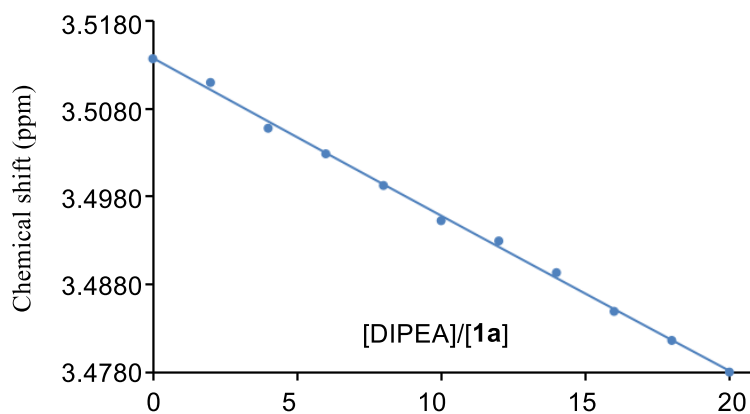

**Figure S5.** The curve fitting of the  $^1\text{H}$  NMR titration data by Bindfit program, available online (<http://supramolecular.org/>); fitting output from Bindfit.

| Base  | $K_a$ ( $\text{M}^{-1}$ ) | Yield/% |
|-------|---------------------------|---------|
| TMEDA | $3.78 \times 10^{-5}$     | trace   |
| DIPEA | 0.10                      | 21      |
| DBU   | 1.08                      | 88      |

**Scheme S6.**  $K_a$  values and yields for TMEDA, DIPEA and DBU.

## 5. Compound Characterization Data

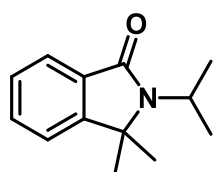

**2a**

**2-isopropyl-3,3-dimethylisoindolin-1-one (2a):** Following the general procedure A, the title product was obtained after purification by column chromatography (PE/EA = 10:1-30:1) as a white solid (36 mg, 0.177 mmol, 88%).  $^1\text{H NMR}$  (500 MHz, Chloroform-*d*)  $\delta$  7.77 (d,  $J$  = 7.5 Hz, 1H), 7.50 – 7.48 (m, 1H), 7.42 – 7.38 (m, 1H), 7.34 (d,  $J$  = 7.5 Hz, 1H), 3.67 – 3.60 (m, 1H), 1.56 (d,  $J$  = 6.8 Hz, 6H), 1.47 (s, 6H).  $^{13}\text{C NMR}$  (126 MHz, Chloroform-*d*)  $\delta$  167.3, 151.3, 132.1, 131.3, 127.9, 123.3, 120.7, 63.4, 44.6, 25.5, 20.6. These data are in agreement with those reported previously in the literature.<sup>6</sup>

For the large-scale reaction, 2-isopropyl-3,3-dimethylisoindolin-1-one (1.1g, 3.3 mmol) was added to a dry schlenk which was then evacuated and filled with argon (three times). After the addition of DMF (10.0 mL) to the mixture via gastight syringe, DBU (0.495g, 9.9 mmol, 3 equiv.) was added. After the reaction completion (overnight) the product was obtained after purification by column chromatography (PE/EA = 10:1 - 30:1) as a white solid (649 mg, 3.2 mmol, 97% yield) and characterized as described above.

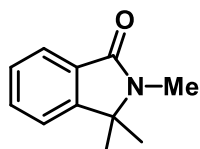

**2b**

**2,3,3-trimethylisoindolin-1-one (2b):** Following the general procedure A, the title product was obtained after purification by column chromatography (PE/EA = 10:1-30:1) as a white solid (29 mg, 0.166 mmol, 83%).  $^1\text{H NMR}$  (500 MHz, Chloroform-*d*)  $\delta$  7.82 (d,  $J$  = 7.5 Hz, 1H), 7.55 – 7.50 (m, 1H), 7.44 – 7.40 (m, 2H), 3.03 (s, 3H), 1.45 (s, 6H).  $^{13}\text{C NMR}$  (126 MHz, Chloroform-*d*)  $\delta$  167.4, 151.6, 131.6, 131.0, 128.1, 123.7, 120.8, 62.2, 27.0, 25.1, 24.0. These data are in agreement with those reported previously in the literature.<sup>6</sup>

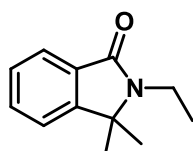

**2c**

**2-ethyl-3,3-dimethylisoindolin-1-one (2c):** Following the general procedure A, the title product was obtained after purification by column chromatography (PE/EA = 10:1-30:1) as a white solid (31 mg, 0.166 mmol, 83%).  $^1\text{H NMR}$  (500 MHz, Chloroform-*d*)  $\delta$  7.81 (d,  $J$  = 7.5 Hz, 1H), 7.54 – 7.50 (m, 1H), 7.43 – 7.39 (m, 1H), 7.37 (d,  $J$  = 7.6 Hz, 1H), 3.55 – 3.50 (m, 2H), 1.49 (s, 6H), 1.31 (t,  $J$  = 7.2 Hz, 3H).  $^{13}\text{C NMR}$  (126 MHz, Chloroform-*d*)  $\delta$  177.5, 143.8, 140.6, 140.1, 130.7, 128.4, 99.8, 36.2, 31.9, 20.6, 20.1, 19.7. These data are in agreement with those reported previously in the literature.<sup>7</sup>

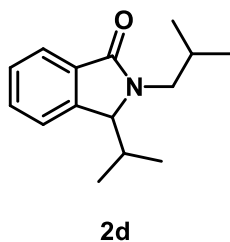

**2-isobutyl-3-isopropylisoindolin-1-one (2d):** Following the general procedure A, the title product was obtained after purification by column chromatography (PE/EA = 10:1–30:1) as a white solid (33 mg, 0.142 mmol, 71%). <sup>1</sup>H NMR (400 MHz, Chloroform-*d*) δ 7.89 – 7.84 (m, 1H), 7.53 – 7.43(m, 3H), 4.47 (d, *J* = 3.3 Hz, 1H), 3.89 (dd, *J* = 14.0, 10.1 Hz, 1H), 2.92 (dd, *J* = 13.9, 5.1 Hz, 1H), 2.47 – 2.36 (m, 1H), 2.08 – 1.95 (m, 1H), 1.24 (d, *J* = 7.1 Hz, 3H), 1.00 (d, *J* = 6.9 Hz, 3H), 0.86 (d, *J* = 6.9 Hz, 3H), 0.47 (d, *J* = 6.8 Hz, 3H). <sup>13</sup>C NMR (126 MHz, Chloroform-*d*) δ 168.8, 143.4, 133.5, 130.8, 128.1, 123.8, 123.2, 64.2, 47.1, 28.8, 27.4, 20.7, 19.9, 19.2, 14.9. These data are in agreement with those reported previously in the literature.<sup>6</sup>

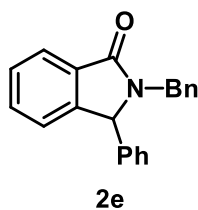

**2-benzyl-3-phenylisoindolin-1-one (2e):** Following the general procedure A, the title product was obtained after purification by column chromatography (PE/EA = 10:1–30:1) as a white solid (36 mg, 0.120 mmol, 60%). <sup>1</sup>H NMR (400 MHz, Chloroform-*d*) δ 8.00 – 7.89 (m, 2H), 7.51 – 7.42 (m, 2H), 7.37 – 7.34(m, 3H), 7.31 – 7.25 (m, 3H), 7.19 – 7.17(m, 2H), 7.13 – 7.05 (m, 3H), 5.41 (d, *J* = 14.8 Hz, 1H), 5.24 (s, 1H), 3.73 (d, *J* = 14.9 Hz, 1H). <sup>13</sup>C NMR (101 MHz, Chloroform-*d*) δ 43.9, 63.7, 123.3, 123.9, 127.7, 127.9, 128.5, 128.6, 128.8, 129.3, 131.5, 132.0, 136.9, 137.2, 146.5, 168.7. These data are in agreement with those reported previously in the literature.<sup>8</sup>

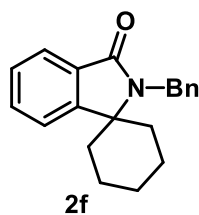

**2'-benzylspiro[cyclohexane-1,1'-isoindolin]-3'-one (2f):** Following the general procedure A, the title product was obtained after purification by column chromatography (PE/EA = 10:1–30:1) as a white solid (42 mg, 0.144 mmol, 72%). <sup>1</sup>H NMR (500 MHz, Chloroform-*d*) δ 7.95 (d, *J* = 7.3 Hz, 1H), 7.79 (d, *J* = 7.0 Hz, 1H), 7.54 – 7.46 (m, 2H), 7.31 (d, *J* = 6.7 Hz, 2H), 7.26 (d, *J* = 9.3 Hz, 2H), 7.22 – 7.18 (m, 1H), 4.78 (s, 2H), 1.93 – 1.82 (m, 5H), 1.78 (d, *J* = 15.0 Hz, 2H), 1.40 (d, *J* = 11.3 Hz, 2H), 1.30 – 1.23 (m, 1H). <sup>13</sup>C NMR (126 MHz, Chloroform-*d*) δ 168.2, 150.9, 138.9, 131.4, 131.0, 128.6, 128.0, 127.2, 127.1, 124.2, 123.8, 65.9, 42.6, 34.4, 24.8, 22.6. These data are in agreement with those reported previously in the literature.<sup>6</sup>

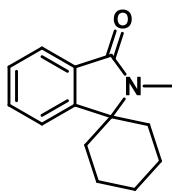

**2g**

**2'-methylspiro[cyclohexane-1,1'-isoindolin]-3'-one (2f):** Following the general procedure A, the title product was obtained after purification by column chromatography (PE/EA = 10:1-30:1) as a white solid (27 mg, 0.126 mmol, 63%). <sup>1</sup>H NMR (500 MHz, Chloroform-*d*) δ 7.89 (d, *J* = 6.7 Hz, 1H), 7.80 (d, *J* = 7.5 Hz, 1H), 7.53 – 7.49 (m, 1H), 7.48 – 7.44 (m, 1H), 3.05 (s, 3H), 1.95 (d, *J* = 9.7 Hz, 5H), 1.92 – 1.86 (m, 2H), 1.44 (d, *J* = 9.8 Hz, 2H), 1.41 – 1.34 (m, 1H). <sup>13</sup>C NMR (126 MHz, Chloroform-*d*) δ 167.6, 150.7, 131.8, 130.7, 128.0, 123.9, 123.5, 64.5, 33.0, 24.9, 24.4, 22.5. These data are in agreement with those reported previously in the literature.<sup>6</sup>

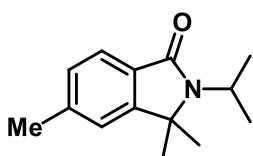

**2h**

**2-isopropyl-3,3,5-trimethylisoindolin-1-one (2g):** Following the general procedure A, the title product was obtained after purification by column chromatography (PE/EA = 10:1-30:1) as a colorless oil (36 mg, 0.166 mmol, 83%). <sup>1</sup>H NMR (500 MHz, Chloroform-*d*) δ 7.64 (d, *J* = 7.7 Hz, 1H), 7.19 (d, *J* = 6.9 Hz, 1H), 7.12 (s, 1H), 2.43 (s, 3H), 1.55 (s, 3H), 1.53 (s, 3H), 1.45 (s, 6H). <sup>13</sup>C NMR (126 MHz, Chloroform-*d*) δ 167.5, 151.7, 141.8, 129.6, 128.9, 123.1, 121.2, 63.2, 44.6, 25.58, 22.0, 20.6. These data are in agreement with those reported previously in the literature.<sup>6</sup>

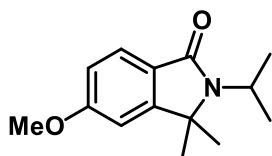

**2i**

**2-isopropyl-5-methoxy-3,3-dimethylisoindolin-1-one (2h):** Following the general procedure A, the title product was obtained after purification by column chromatography (PE/EA = 10:1-30:1) as a white solid (29 mg, 0.124 mmol, 62%). <sup>1</sup>H NMR (500 MHz, Chloroform-*d*) δ 7.67 (d, *J* = 8.3 Hz, 1H), 6.92 – 6.90 (m, 1H), 6.80 (d, *J* = 2.2 Hz, 1H), 3.86 (s, 3H), 3.61 (p, *J* = 6.9 Hz, 1H), 1.54 (d, *J* = 6.8 Hz, 6H), 1.45 (s, 6H). <sup>13</sup>C NMR (126 MHz, Chloroform-*d*) δ 167.2, 162.7, 153.6, 124.8, 124.7, 114.0, 106.0, 63.0, 55.7, 44.6, 25.7, 20.7. These data are in agreement with those reported previously in the literature.<sup>6</sup>

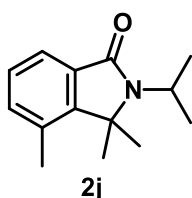

**2j**

**2-isopropyl-3,3,4-trimethylisoindolin-1-one (2j):** Following the general procedure A, the title product was obtained after purification by column chromatography (PE/EA = 10:1-30:1) as a white solid (17 mg, 0.078 mmol, 39%). <sup>1</sup>H NMR (400 MHz, Chloroform-*d*) δ 7.64 (d, *J* = 6.9 Hz, 1H), 7.33 – 7.29 (m, 1H), 7.26 (d, *J* = 7.5 Hz, 1H), 3.67 – 3.60 (m, 1H), 2.49 (s, 3H), 1.57 (d, *J*

= 6.9 Hz, 6H), 1.55 (s, 6H).  $^{13}\text{C NMR}$  (151 MHz, Chloroform-*d*)  $\delta$  167.3, 148.2, 133.8, 132.8, 131.6, 128.0, 121.0, 64.3, 44.4, 23.0, 20.6, 18.8. These data are in agreement with those reported previously in the literature.<sup>9</sup>

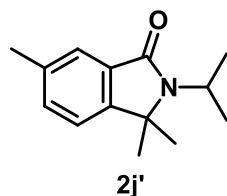

**2-isopropyl-3,3,6-trimethylisoindolin-1-one (2j')**: Following the general procedure A, the title product was obtained after purification by column chromatography (PE/EA = 10:1–30:1) as a white solid (8 mg, 0.037 mmol, 18%).  $^1\text{H NMR}$  (600 MHz, Chloroform-*d*)  $\delta$  7.57 (s, 1H), 7.31 (d,  $J$  = 7.7 Hz, 1H), 7.23 (d,  $J$  = 7.7 Hz, 1H), 3.65 – 3.61(m, 1H), 2.42 (s, 3H), 1.55 (d,  $J$  = 6.9 Hz, 6H), 1.46 (s, 6H).  $^{13}\text{C NMR}$  (151 MHz, Chloroform-*d*)  $\delta$  167.4, 148.7, 137.9, 132.3, 123.5, 120.5, 63.2, 44.6, 25.6, 21.4, 20.6. These data are in agreement with those reported previously in the literature.<sup>9</sup>

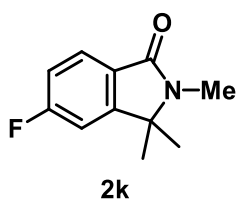

**5-fluoro-2,3,3-trimethylisoindolin-1-one (2i)** Following the general procedure A, the title product was obtained after purification by column chromatography (PE/EA = 10:1–30:1) as a yellow solid (22 mg, 0.114 mmol, 57%).  $^1\text{H NMR}$  (500 MHz, Chloroform-*d*)  $\delta$  7.82 – 7.80(m, 1H), 7.09 – 7.05(m, 2H), 3.02 (s, 3H), 1.45 (s, 6H).  $^{13}\text{C NMR}$  (126 MHz, )  $\delta$  166.4, 165.4 (d,  $J$  = 250.8 Hz), 154.2 (d,  $J$  = 8.9 Hz), 127.2, 125.8 (d,  $J$  = 9.7 Hz), 115.9 (d,  $J$  = 23.3 Hz), 108.4 (d,  $J$  = 23.9 Hz), 62.0, 25.1, 24.2.  $^{19}\text{F NMR}$  (471 MHz, Chloroform-*d*)  $\delta$  -107.50 – -107.64 (m, 1F). **IR (ATR)**  $\nu$  3050, 2972, 1677, 1392, 1186, 692,  $\text{cm}^{-1}$ . **HRMS (ESI):**  $m/z$  [M+H]<sup>+</sup> calcd for  $\text{C}_{11}\text{H}_{13}\text{FON}^+$ : 194.0976; found: 194.0975. **Melting Point** (Experimental): 125 °C – 126 °C.

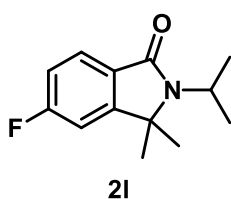

**5-fluoro-2-isopropyl-3,3-dimethylisoindolin-1-one (2j)**: Following the general procedure A, the title product was obtained after purification by column chromatography (PE/EA = 10:1–30:1) as a white solid (35 mg, 0.150 mmol, 75%).  $^1\text{H NMR}$  (500 MHz, Chloroform-*d*)  $\delta$  7.48 – 7.41 (m, 1H), 7.11 (d,  $J$  = 7.5 Hz, 1H), 7.03 – 6.98 (m, 1H), 3.60 (p,  $J$  = 6.8 Hz, 1H), 1.54 (d,  $J$  = 6.8 Hz, 6H), 1.46 (s, 6H).  $^{13}\text{C NMR}$  (126 MHz, Chloroform-*d*)  $\delta$  166.3, 165.2 (d,  $J$  = 250.5 Hz), 153.8 (d,  $J$  = 9.0 Hz), 128.1, 125.4 (d,  $J$  = 9.6 Hz), 115.6 (d,  $J$  = 23.4 Hz), 108.1 (d,  $J$  = 23.7 Hz), 63.1, 44.8, 25.5, 20.6.  $^{19}\text{F NMR}$  (471 MHz, Chloroform-*d*)  $\delta$  -107.91 – -107.99 (m, 1F). These data are in agreement with those reported previously in the literature.<sup>6</sup>

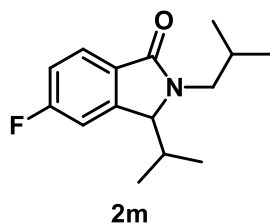

**5-fluoro-2-isobutyl-3-isopropylisoindolin-1-one (2k):** Following the general procedure A, the title product was obtained after purification by column chromatography (PE/EA = 10:1-30:1) as a white solid (33 mg, 0.142 mmol, 71%). **<sup>1</sup>H NMR** (500 MHz, Chloroform-*d*)  $\delta$  7.82 (s, 1H), 7.15 (d, *J* = 8.5 Hz, 2H), 4.44 – 4.41 (m, 1H), 3.88 – 3.82 (m, 1H), 2.94 – 2.87 (m, 1H), 2.40 (dd, *J* = 6.8, 3.5 Hz, 1H), 2.03 – 1.96 (m, 1H), 1.22 (d, *J* = 7.1 Hz, 3H), 1.01 – 0.97 (m, 3H), 0.84 (d, *J* = 6.7 Hz, 3H), 0.49 (d, *J* = 6.8 Hz, 3H). **<sup>13</sup>C NMR** (126 MHz, Chloroform-*d*)  $\delta$  167.9, 164.7 (d, *J* = 250.1 Hz), 145.7 (d, *J* = 9.7 Hz), 125.7 (d, *J* = 9.7 Hz), 115.8 (d, *J* = 23.4 Hz), 110.7 (d, *J* = 24.3 Hz), 64.0, 47.2, 28.7, 27.4, 20.7, 19.9, 19.1, 14.9. **<sup>19</sup>F NMR** (471 MHz, Chloroform-*d*)  $\delta$  -108.34 – -107.42 (m, 1F). **IR (ATR)**  $\nu$  2961, 2931, 2874, 1685, 1625, 1416, 1244, 1094, 770,  $\text{cm}^{-1}$ . **HRMS** (ESI): *m/z* [M+Na]<sup>+</sup> calcd for C<sub>15</sub>H<sub>19</sub>FONNa<sup>+</sup>: 271.1343; found: 271.1342. **Melting Point** (Experimental): 55 °C – 56 °C.

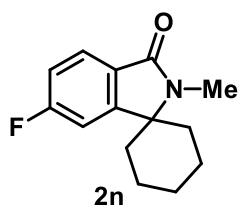

**6'-fluoro-2'-methylspiro[cyclopentane-1,1'-isoindolin]-3'-one (2l):** Following the general procedure A, the title product was obtained after purification by column chromatography (PE/EA = 10:1-30:1) as a white solid (25 mg, 0.116 mmol, 58%). **<sup>1</sup>H NMR** (500 MHz, Chloroform-*d*)  $\delta$  7.86 – 7.82 (m, 1H), 7.49 – 7.45 (m, 1H), 7.18 – 7.13 (m, 1H), 3.03 (s, 3H), 1.97 – 1.87 (m, 7H), 1.46 – 1.34 (m, 3H). **<sup>13</sup>C NMR** (126 MHz, Chloroform-*d*)  $\delta$  166.8, 164.5 (d, *J* = 249.5 Hz), 153.0 (d, *J* = 9.7 Hz), 128.0, 125.9 (d, *J* = 9.7 Hz), 115.6 (d, *J* = 23.3 Hz), 111.5 (d, *J* = 24.8 Hz), 64.4, 33.0, 24.9, 24.6, 22.7. **<sup>19</sup>F NMR** (471 MHz, Chloroform-*d*)  $\delta$  -108.03 – -107.12 (m, 1F). **IR (ATR)**  $\nu$  2933, 2855, 1683, 1404, 1231, 1052, 693,  $\text{cm}^{-1}$ . **HRMS** (ESI): *m/z* [M+H]<sup>+</sup> calcd for C<sub>14</sub>H<sub>17</sub>FON<sup>+</sup>: 235.1322; found: 235.1320. **Melting Point** (Experimental): 92 °C – 93 °C.

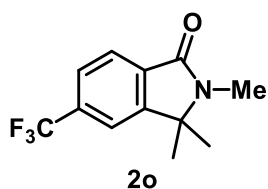

**2,3,3-trimethyl-5-(trifluoromethyl)isoindolin-1-one (2m):** Following the general procedure A, the title product was obtained after purification by column chromatography (PE/EA = 10:1-30:1) as a yellow solid (30 mg, 0.124 mmol, 62%). **<sup>1</sup>H NMR** (500 MHz, Chloroform-*d*)  $\delta$  7.94 (d, *J* = 7.9 Hz, 1H), 7.71 (d, *J* = 9.3 Hz, 1H), 7.67 (s, 1H), 3.06 (s, 3H), 1.50 (s, 6H). **<sup>13</sup>C NMR** (126 MHz, Chloroform-*d*)  $\delta$  165.9, 151.9, 134.3, 133.5 (q, *J* = 64.4, 32.4 Hz), 125.5 (q, *J* = 3.4 Hz), 124.3, 122.9 (q, *J* = 273.3 Hz), 118.2 (q, *J* = 3.8 Hz), 62.5, 24.9, 24.2. **<sup>19</sup>F NMR** (471 MHz, Chloroform-*d*)  $\delta$  -62.11 (s, 3F). **IR (ATR)**  $\nu$  1683, 1434, 1326, 1167, 1116, 1060, 1030, 795, 697,  $\text{cm}^{-1}$ . **HRMS** (ESI): *m/z* [M+H]<sup>+</sup> calcd for C<sub>12</sub>H<sub>13</sub>FON<sup>+</sup>: 244.0944; found: 244.0942. **Melting Point** (Experimental): 95 °C – 96 °C.

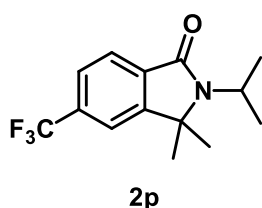

**2-isopropyl-3,3-dimethyl-5-(trifluoromethyl)isoindolin-1-one**

**(2n):** Following the general procedure A, the title product was obtained after purification by column chromatography (PE/EA = 10:1-30:1) as a colorless oil (45 mg, 0.167 mmol, 84%). <sup>1</sup>H NMR (500 MHz, Chloroform-*d*) δ 7.86 (d, *J* = 8.0 Hz, 1H), 7.67 (d, *J* = 7.9 Hz, 1H), 7.59 (s, 1H), 3.70 – 3.60 (m, 1H), 1.55 (d, *J* = 6.8 Hz, 6H), 1.50 (s, 6H). <sup>13</sup>C NMR (126 MHz, Chloroform-*d*) δ 165.9, 151.7, 135.4, 133.3 (q, *J* = 32.1 Hz), 125.4 (q, *J* = 3.8 Hz), 123.9, 122.9 (q, *J* = 273.3 Hz), 118.1 (q, *J* = 3.8 Hz), 63.6, 45.0, 25.4, 20.5. <sup>19</sup>F NMR (471 MHz, Chloroform-*d*) δ -62.10(s, 3F).

These data are in agreement with those reported previously in the literature.<sup>6</sup>

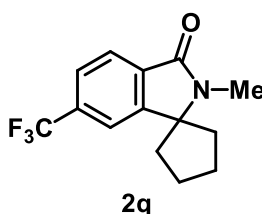

**2'-methyl-6'-(trifluoromethyl)spiro[cyclopentane-1,1'-**

**isoindolin]-3'-one (20):** Following the general procedure A, the title product was obtained after purification by column chromatography (PE/EA = 10:1-30:1) as a white solid (32 mg, 0.119 mmol, 59%). <sup>1</sup>H NMR (500 MHz, Chloroform-*d*) δ 7.89 (d, *J* = 8.0 Hz, 1H), 7.68 (d, *J* = 7.9

Hz, 1H), 7.63 (s, 1H), 3.06 (s, 3H), 2.12 – 2.07 (m, 2H), 2.06 – 2.01 (m, 4H), 1.97 (dd, *J* = 12.9, 5.3 Hz, 2H). <sup>13</sup>C NMR (126 MHz, Chloroform-*d*) δ 166.1, 153.4, 133.9, 133.8 (q, *J* = 34.4Hz), 125.1 (q, *J* = 3.8 Hz), 123.9, 124.0 (q, *J* = 3.8 Hz), 118.0 (q, *J* = 3.9 Hz), 72.2, 36.0, 26.7, 24.9. <sup>19</sup>F NMR (471 MHz, Chloroform-*d*) δ -62.07(s, 3F). **IR (ATR)** ν 2959, 2877, 1699, 1435, 1331, 1159, 1108, 842, cm<sup>-1</sup>. **HRMS (ESI):** *m/z* [M+H]<sup>+</sup> calcd for C<sub>14</sub>H<sub>15</sub>FON<sup>+</sup>: 270.1100; found: 270.1095. **Melting Point (Experimental):** 115 °C – 116 °C.

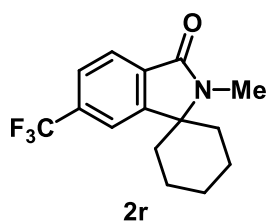

**2'-methyl-6'-(trifluoromethyl)spiro[cyclohexane-1,1'-**

**isoindolin]-3'-one (2p):** Following the general procedure A, the title product was obtained after purification by column chromatography (PE/EA = 10:1-30:1) as a white solid (32 mg, 0.112 mmol, 57%). <sup>1</sup>H NMR (500 MHz, Chloroform-*d*) δ 8.03 – 7.96 (m, 2H), 7.74 (d, *J* = 9.5

Hz, 1H), 3.07 (s, 3H), 1.99 (dd, *J* = 12.3, 4.8 Hz, 2H), 1.93 (m, *J* = 10.0, 3.9 Hz, 5H), 1.50 – 1.36 (m, 3H). <sup>13</sup>C NMR (126 MHz, Chloroform-*d*) δ 166.1, 150.9, 135.0, 132.5 (q, *J* = 32.0 Hz), 125.4 (q, *J* = 3.7 Hz), 124.1 (q, *J* = 273.7 Hz), 120.4 (q, *J* = 4.2 Hz), 120.4, 64.8, 32.8, 24.7, 24.6, 22.6. <sup>19</sup>F NMR (471 MHz, Chloroform-*d*) δ -67.27(s, 3F). **IR (ATR)** ν 2938, 2873, 1685, 1326, 1166, 1123, 1064, 697, cm<sup>-1</sup>. **HRMS (ESI):** *m/z* [M+H]<sup>+</sup> calcd for C<sub>15</sub>H<sub>17</sub>F<sub>3</sub>ON<sup>+</sup>: 284.1257; found: 284.1254. **Melting Point (Experimental):** 115 °C – 116 °C.



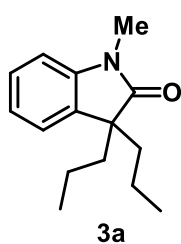

**1-methyl-3,3-dipropylindolin-2-one (3a):** Following the general procedure B, the title product was obtained after purification by column chromatography (PE/EA = 10:1-30:1) as a white solid (33 mg, 0.142 mmol, 71%).  $^1\text{H NMR}$  (500 MHz, Chloroform-*d*)  $\delta$  7.28 – 7.24 (m, 1H), 7.14 (d,  $J$  = 7.6 Hz, 1H), 7.08 – 7.05 (m, 1H), 6.82 (d,  $J$  = 7.8 Hz, 1H), 3.20 (s, 3H), 1.89 – 1.83 (m, 2H), 1.71 (dd,  $J$  = 12.9, 8.6 Hz, 2H), 1.01 – 0.95 (m, 2H), 0.84 – 0.80 (m, 2H), 0.77 (d,  $J$  = 7.0 Hz, 6H).  $^{13}\text{C NMR}$  (126 MHz, Chloroform-*d*)  $\delta$  180.5, 144.2, 132.9, 127.6, 122.8, 122.5, 107.8, 53.5, 40.4, 26.1, 17.6, 14.3. These data are in agreement with those reported previously in the literature.<sup>10</sup>

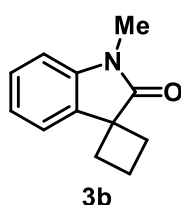

**1'-methylspiro[cyclobutane-1,3'-indolin]-2'-one (3b):** Following the general procedure B, the title product was obtained after purification by column chromatography (PE/EA = 10:1-30:1) a colorless oil (29 mg, 0.155 mmol, 78%).  $^1\text{H NMR}$  (500 MHz, Chloroform-*d*)  $\delta$  7.51 (dd,  $J$  = 7.4, 1.2 Hz, 1H), 7.25 (d,  $J$  = 7.9 Hz, 1H), 7.12 – 7.07 (m, 1H), 6.83 – 6.74 (m, 1H), 3.19 (s, 3H), 2.68 – 2.62 (m, 2H), 2.39 – 2.23 (m, 4H).  $^{13}\text{C NMR}$  (126 MHz, Chloroform-*d*)  $\delta$  180.3, 143.1, 134.5, 127.9, 122.7, 122.4, 107.7, 48.2, 31.4, 26.3, 16.9. These data are in agreement with those reported previously in the literature.<sup>6</sup>

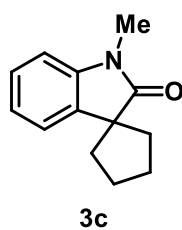

**1'-methylspiro[cyclopentane-1,3'-indolin]-2'-one (3c):** Following the general procedure B, the title product was obtained after purification by column chromatography (PE/EA = 10:1-30:1) as a colorless oil (19 mg, 0.095 mmol, 48%).  $^1\text{H NMR}$  (500 MHz, Chloroform-*d*)  $\delta$  7.24 (d,  $J$  = 8.9 Hz, 1H), 7.20 (d,  $J$  = 7.4 Hz, 1H), 7.06 – 7.02 (m, 1H), 6.82 (d,  $J$  = 7.7 Hz, 1H), 3.21 (s, 3H), 2.14 (dd,  $J$  = 11.9, 6.6 Hz, 2H), 2.11 – 2.04 (m, 2H), 1.98 (d,  $J$  = 6.8 Hz, 2H), 1.84 (dd,  $J$  = 11.8, 7.1 Hz, 2H).  $^{13}\text{C NMR}$  (126 MHz, Chloroform-*d*)  $\delta$  182.1, 143.0, 137.0, 127.5, 122.6, 122.4, 107.8, 54.0, 38.5, 26.8, 26.4. These data are in agreement with those reported previously in the literature.<sup>6</sup>

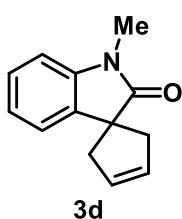

**1'-methylspiro[cyclopentane-1,3'-indolin]-3-en-2'-one (3d):** Following the general procedure B, the title product was obtained after purification by column chromatography (PE/EA = 10:1-30:1) as a white solid (18 mg, 0.090 mmol, 45%).  $^1\text{H NMR}$  (500 MHz, Chloroform-*d*)  $\delta$  7.26 (d,  $J$  = 1.5 Hz, 1H),

7.25 (d,  $J = 1.8$  Hz, 1H), 7.04 – 7.00(m, 1H), 6.83 (d,  $J = 7.1$  Hz, 1H), 5.84 (s, 2H), 3.23 (s, 3H), 3.04 – 2.97 (m, 2H), 2.59 (d,  $J = 14.9$  Hz, 2H).  $^{13}\text{C NMR}$  (126 MHz, Chloroform- $d$ )  $\delta$  181.6, 142.7, 137.5, 129.1, 127.8, 123.0, 121.7, 107.9, 52.2, 45.1, 26.5. These data are in agreement with those reported previously in the literature.<sup>6</sup>

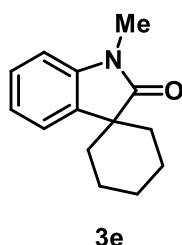

**1'-methylspiro[cyclohexane-1,3'-indolin]-2'-one (3e):** Following the general procedure B, the title product was obtained after purification by column chromatography (PE/EA = 10:1–30:1) as a white solid (23 mg, 0.106 mmol, 53%).  $^1\text{H NMR}$  (500 MHz, Chloroform- $d$ )  $\delta$  7.46 (d,  $J = 7.4$  Hz, 1H), 7.30 – 7.26 (m, 1H), 7.07 – 7.02 (m, 1H), 6.85 (d,  $J = 7.7$  Hz, 1H), 3.20 (s, 3H), 1.97 – 1.91 (m, 2H), 1.87 – 1.81 (m, 2H), 1.79 – 1.71 (m, 3H), 1.69 – 1.59 (m, 2H), 1.59 – 1.53 (m, 2H).  $^{13}\text{C NMR}$  (126 MHz, Chloroform- $d$ )  $\delta$  180.9, 142.9, 135.5, 127.6, 124.0, 122.0, 108.0, 47.6, 33.1, 26.3, 25.3, 21.3. These data are in agreement with those reported previously in the literature.<sup>6</sup>

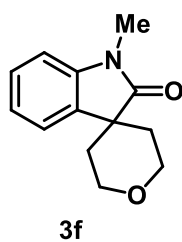

**1-methyl-2',3',5',6'-tetrahydrospiro[indoline-3,4'-pyran]-2-one (3f):** Following the general procedure B, the title product was obtained after purification by column chromatography (PE/EA = 10:1–30:1) as a white solid (34 mg, 0.156 mmol, 78%).  $^1\text{H NMR}$  (500 MHz, Chloroform- $d$ )  $\delta$  7.38 (d,  $J = 7.4$  Hz, 1H), 7.32 – 7.24 (m, 1H), 7.11 – 7.06 (m, 1H), 6.86 (d,  $J = 9.0$  Hz, 1H), 4.30 – 4.23 (m, 2H), 3.95 – 3.90 (m, 2H), 3.21 (s, 3H), 1.89 – 1.84 (m, 4H).  $^{13}\text{C NMR}$  (126 MHz, Chloroform- $d$ )  $\delta$  179.8, 142.9, 134.2, 128.1, 123.2, 122.6, 108.2, 63.1, 44.4, 33.0, 26.2. These data are in agreement with those reported previously in the literature.<sup>6</sup>

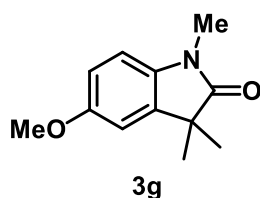

**5-methoxy-1,3,3-trimethylindolin-2-one (3g):** Following the general procedure B, the title product was obtained after purification by column chromatography (PE/EA = 10:1–30:1) as a white solid (19 mg, 0.092 mmol, 46%).  $^1\text{H NMR}$  (500 MHz, Chloroform- $d$ )  $\delta$  6.83 (d,  $J = 2.4$  Hz, 1H), 6.79 (d,  $J = 10.9$  Hz, 1H), 6.75 (d,  $J = 8.4$  Hz, 1H), 3.81 (s, 3H), 3.20 (s, 3H), 1.36 (s, 6H).  $^{13}\text{C NMR}$  (126 MHz, Chloroform- $d$ )  $\delta$  181.2, 156.2, 137.4, 136.3, 111.7, 110.2, 108.4, 56.0, 44.8, 26.4, 24.5. These data are in agreement with those reported previously in the literature.<sup>6</sup>

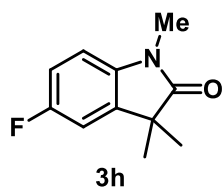

**5-fluoro-1,3,3-trimethylindolin-2-one (3h):** Following the general procedure B, the title product was obtained after purification by column chromatography (PE/EA = 10:1-30:1) as a colorless oil (26 mg, 0.135 mmol, 68%).  $^1\text{H NMR}$  (400 MHz, Chloroform-*d*)  $\delta$  6.99 – 6.93 (m, 2H), 6.79 – 6.74 (m, 1H), 3.21 (s, 3H), 1.37 (s, 6H).  $^{13}\text{C NMR}$  (101 MHz, Chloroform-*d*)  $\delta$  181.1, 159.5 (d,  $J$  = 240.4 Hz), 138.6, 137.5 (d,  $J$  = 7.7 Hz), 113.8 (d,  $J$  = 23.5 Hz), 110.6 (d,  $J$  = 24.6 Hz), 108.5 (d,  $J$  = 8.2 Hz), 44.8, 26.4, 24.4.  $^{19}\text{F NMR}$  (376 MHz, Chloroform-*d*)  $\delta$  -120.77. These data are in agreement with those reported previously in the literature.<sup>6</sup>

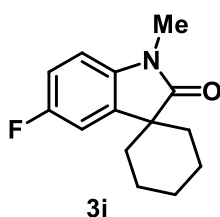

**5'-fluoro-1'-methylspiro[cyclohexane-1,3'-indolin]-2'-one (3i):** Following the general procedure B, the title product was obtained after purification by column chromatography (PE/EA = 10:1-30:1) as a light yellow oil (27 mg, 0.116 mmol, 58%).  $^1\text{H NMR}$  (500 MHz, Chloroform-*d*)  $\delta$  7.22 – 7.18 (m, 1H), 7.00 – 6.94 (m, 1H), 6.76 – 6.73 (m, 1H), 3.19 (s, 3H), 1.98 – 1.90 (m, 2H), 1.88 – 1.81 (m, 2H), 1.76 – 1.70 (m, 2H), 1.70 – 1.62 (m, 2H), 1.57 – 1.51 (m, 2H).  $^{13}\text{C NMR}$  (126 MHz, Chloroform-*d*)  $\delta$  180.5, 159.0 (d,  $J$  = 239.2 Hz), 138.9, 137.0 (d,  $J$  = 7.7 Hz), 113.5 (d,  $J$  = 23.2 Hz), 112.4 (d,  $J$  = 24.9 Hz), 108.2 (d,  $J$  = 8.3 Hz), 48.1, 33.0, 26.4, 25.2, 21.2.  $^{19}\text{F NMR}$  (471 MHz, Chloroform-*d*)  $\delta$  -121.08 – -121.17 (m, 1F). These data are in agreement with those reported previously in the literature.<sup>10</sup>

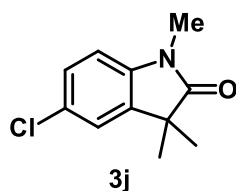

**1,3,3,5-tetramethylindolin-2-one (3j):** Following the general procedure B, the title product was obtained after purification by column chromatography (PE/EA = 10:1-30:1) as a white solid (24 mg, 0.115 mmol, 57%).  $^1\text{H NMR}$  (500 MHz, Chloroform-*d*)  $\delta$  7.23 (dd,  $J$  = 8.2, 2.1 Hz, 1H), 7.17 (d,  $J$  = 2.1 Hz, 1H), 6.76 (d,  $J$  = 8.2 Hz, 1H), 3.20 (s, 3H), 1.36 (s, 6H).  $^{13}\text{C NMR}$  (126 MHz, Chloroform-*d*)  $\delta$  181.0, 141.4, 137.7, 128.0, 127.7, 123.1, 109.1, 44.6, 26.5, 24.4. These data are in agreement with those reported previously in the literature.<sup>6</sup>

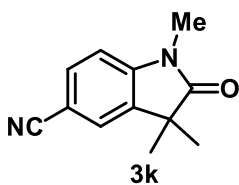

**1,3,3-trimethyl-2-oxindoline-5-carbonitrile (3k):** Following the general procedure B, the title product was obtained after purification by column chromatography (PE/EA = 10:1-30:1) as a white solid (34 mg, 0.179 mmol, 85%).  $^1\text{H NMR}$  (500 MHz, Chloroform-*d*)  $\delta$  7.61 (d,  $J$  = 8.1 Hz, 1H), 7.46 (s, 1H), 6.94 (d,  $J$  = 8.2 Hz, 1H), 3.26 (s, 3H), 1.40 (s, 6H).  $^{13}\text{C NMR}$  (126 MHz,

Chloroform-*d*)  $\delta$  181.0, 146.6, 136.8, 133.2, 125.8 119.3, 108.6, 105.6, 44.0, 26.5, 24.2. These data are in agreement with those reported previously in the literature.<sup>6</sup>

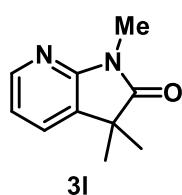

**1,3,3-trimethyl-1,3-dihydro-2H-pyrrolo[2,3-b]pyridin-2-one (3I):**

Following the general procedure B, the title product was obtained after purification by column chromatography (PE/EA = 10:1–30:1) as a white solid (17 mg, 0.096 mmol, 48%). <sup>1</sup>H NMR (500 MHz, Chloroform-*d*)  $\delta$  8.18 – 8.15 (m, 1H), 7.43 – 7.40 (m, 1H), 6.97 – 9.93 (m, 1H), 3.29 (s, 3H), 1.38 (s, 6H). <sup>13</sup>C NMR (126 MHz, Chloroform-*d*)  $\delta$  181.0, 156.4, 146.7, 130.2, 129.7, 118.2, 44.0, 25.5, 24.0. These data are in agreement with those reported previously in the literature.<sup>6</sup>

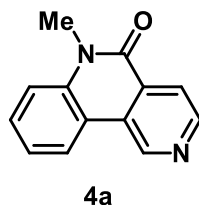

**6-methylbenzo[c][2,6]naphthyridin-5(6H)-one (4a):**

Following the general procedure A, the title product was obtained after purification by column chromatography (PE/EA = 10:1–30:1) as a white solid (20 mg, 0.095 mmol, 48%). <sup>1</sup>H NMR (500 MHz, Chloroform-*d*)  $\delta$  9.70 (s, 1H), 8.82 (d, *J* = 5.2 Hz, 1H), 8.41 (d, *J* = 9.5 Hz, 1H), 8.30 (d, *J* = 5.2 Hz, 1H), 7.65 – 7.60 (m, *J* = 7.1 Hz, 1H), 7.47 (d, *J* = 7.5 Hz, 1H), 7.42 – 7.38 (m, 1H), 3.83 (s, 3H). <sup>13</sup>C NMR (126 MHz, Chloroform-*d*)  $\delta$  160.5, 148.2, 145.8, 138.4, 130.8, 130.7, 128.0, 123.4, 123.0, 121.0, 117.4, 115.5, 30.4. These data are in agreement with those reported previously in the literature.<sup>6</sup>

## 6. NMR Spectra

<sup>1</sup>H NMR of compound **2a** (500 MHz in CDCl<sub>3</sub>)

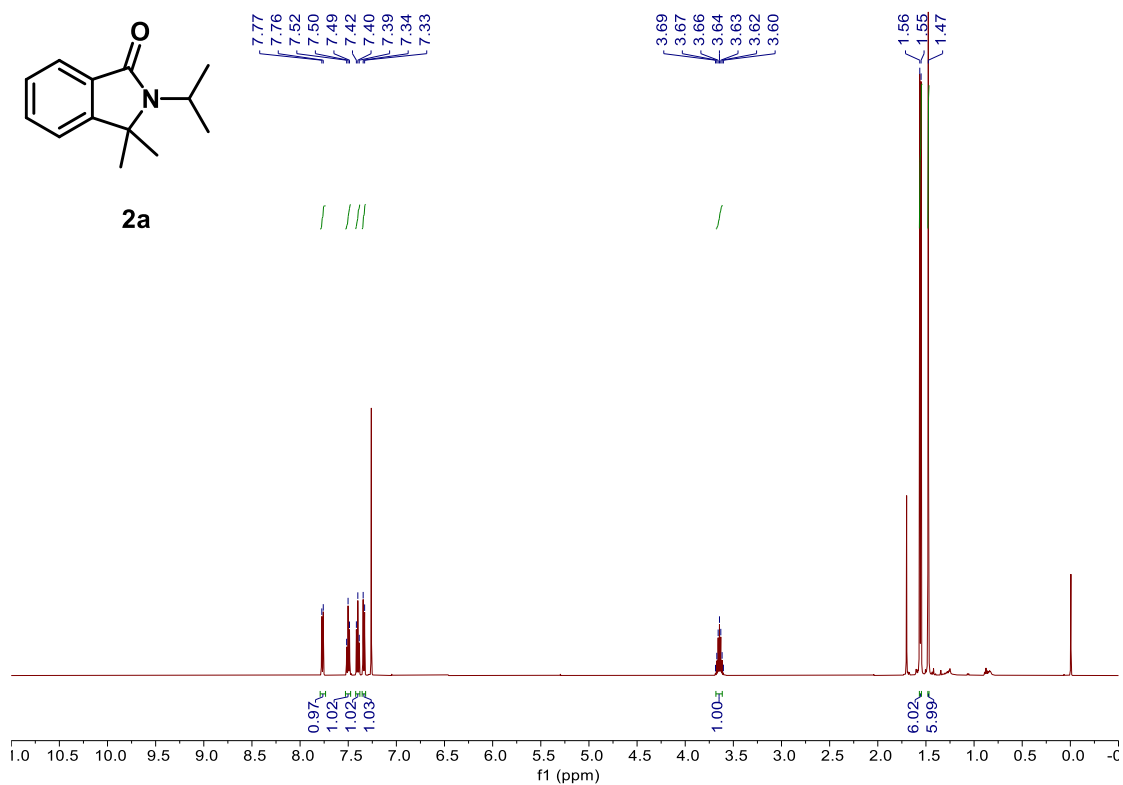

<sup>13</sup>C NMR of compound **2a** (126 MHz in CDCl<sub>3</sub>)

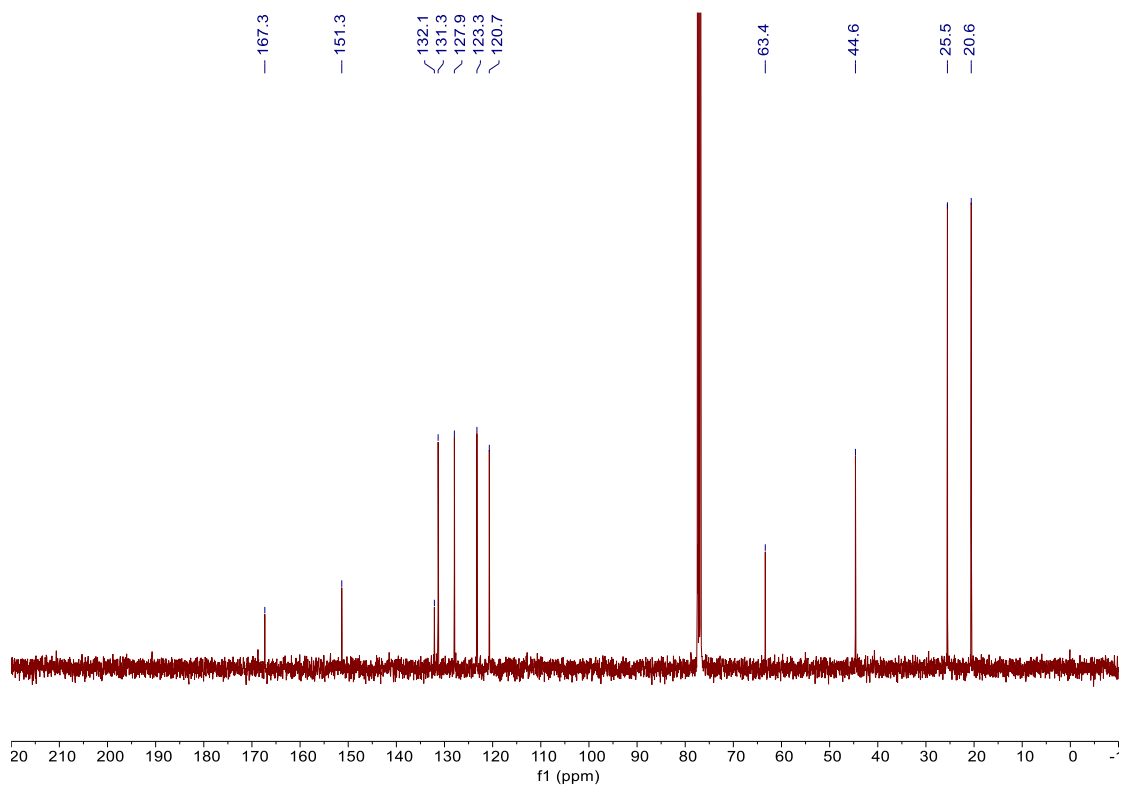

**<sup>1</sup>H NMR of compound 2b (500 MHz in CDCl<sub>3</sub>)**

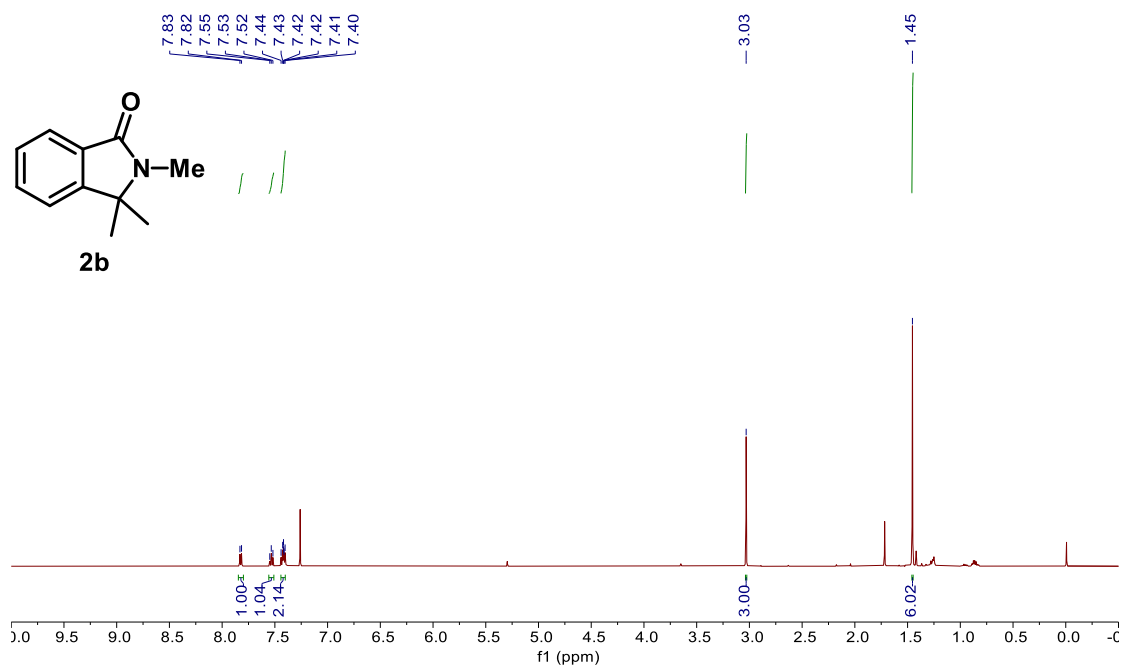

**<sup>13</sup>C NMR of compound 2b (126 MHz in CDCl<sub>3</sub>)**

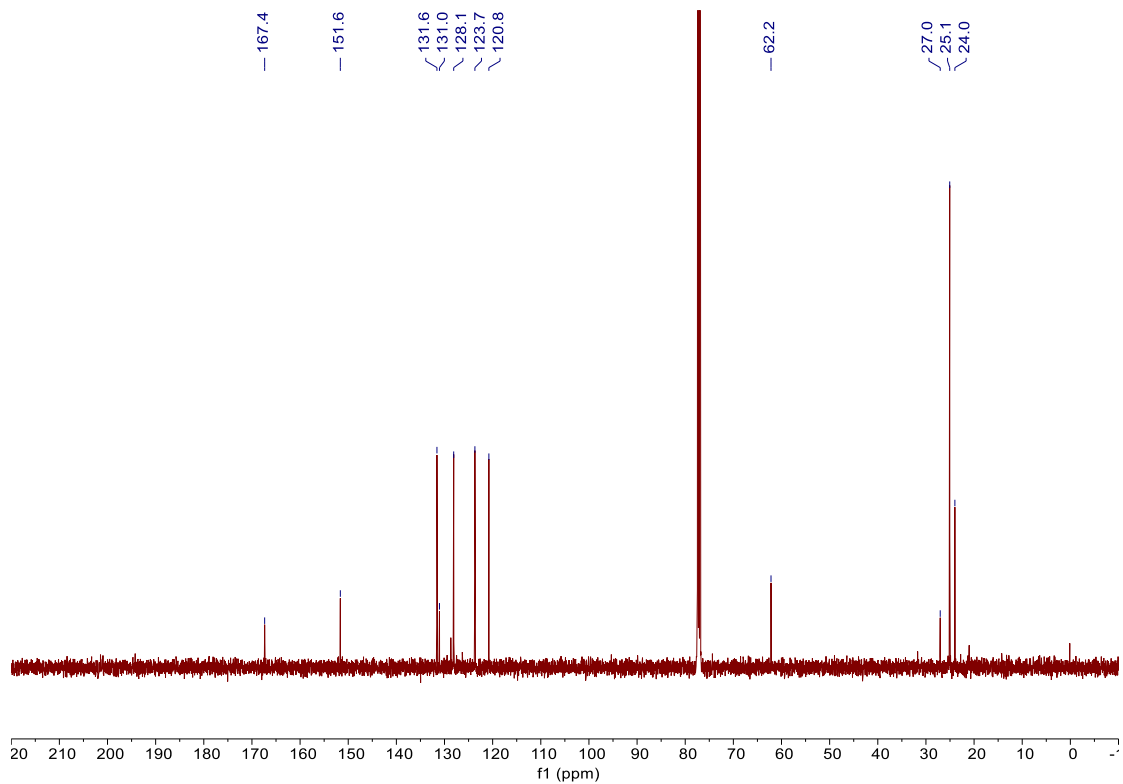

<sup>1</sup>H NMR of compound **2c** (500 MHz in CDCl<sub>3</sub>)

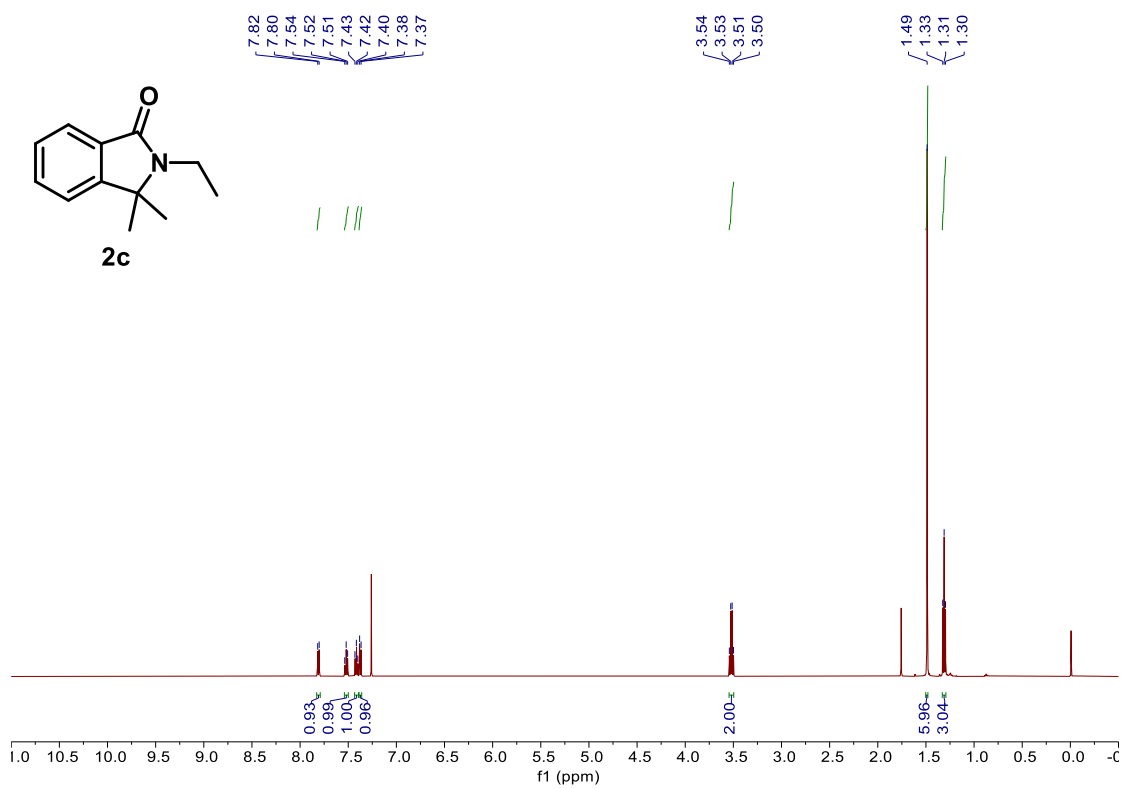

<sup>13</sup>C NMR of compound **2c** (126 MHz in CDCl<sub>3</sub>)

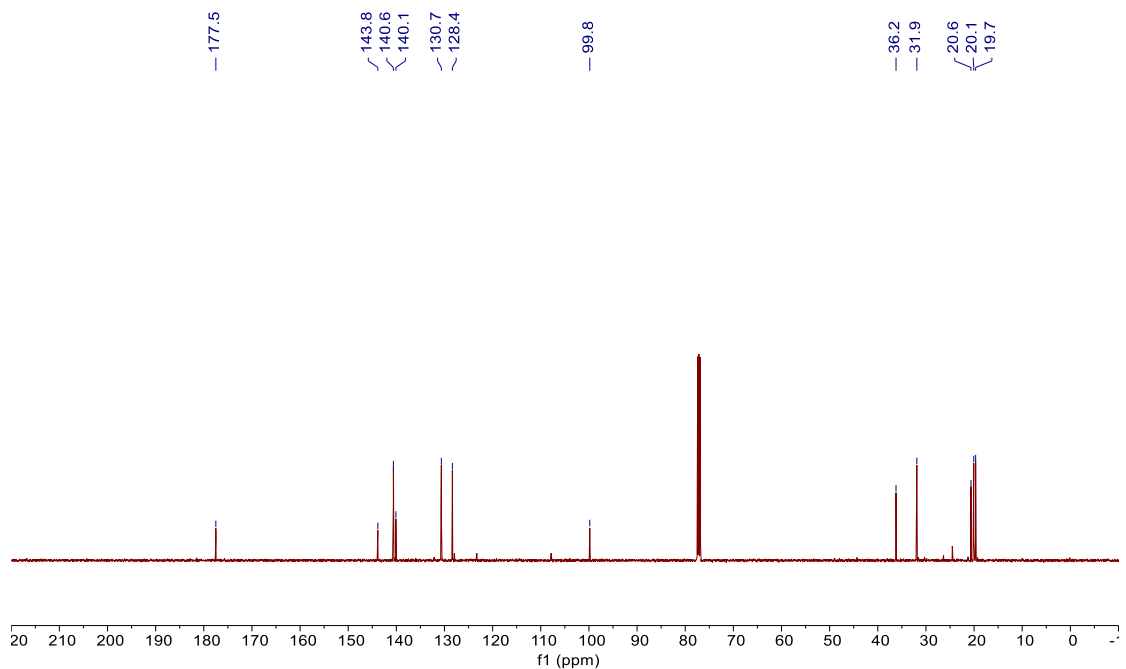

**<sup>1</sup>H NMR of compound 2d (500 MHz in CDCl<sub>3</sub>)**

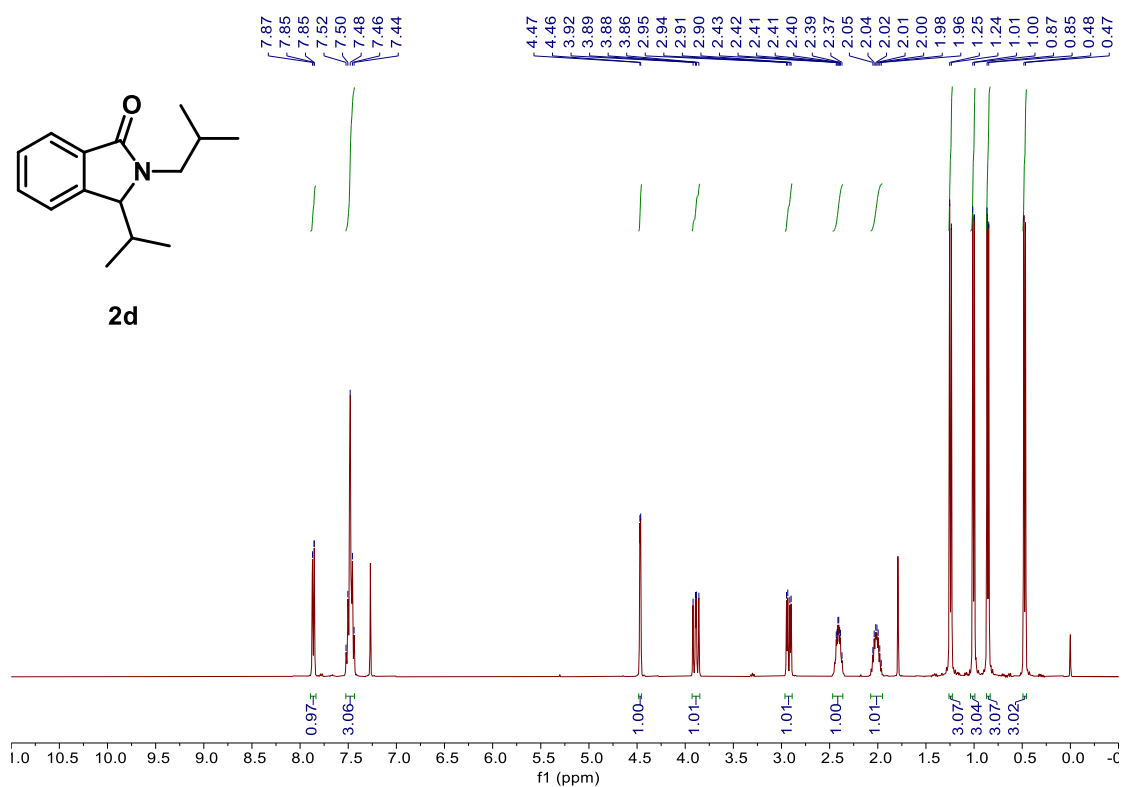

**<sup>13</sup>C NMR of compound 2d (126 MHz in CDCl<sub>3</sub>)**

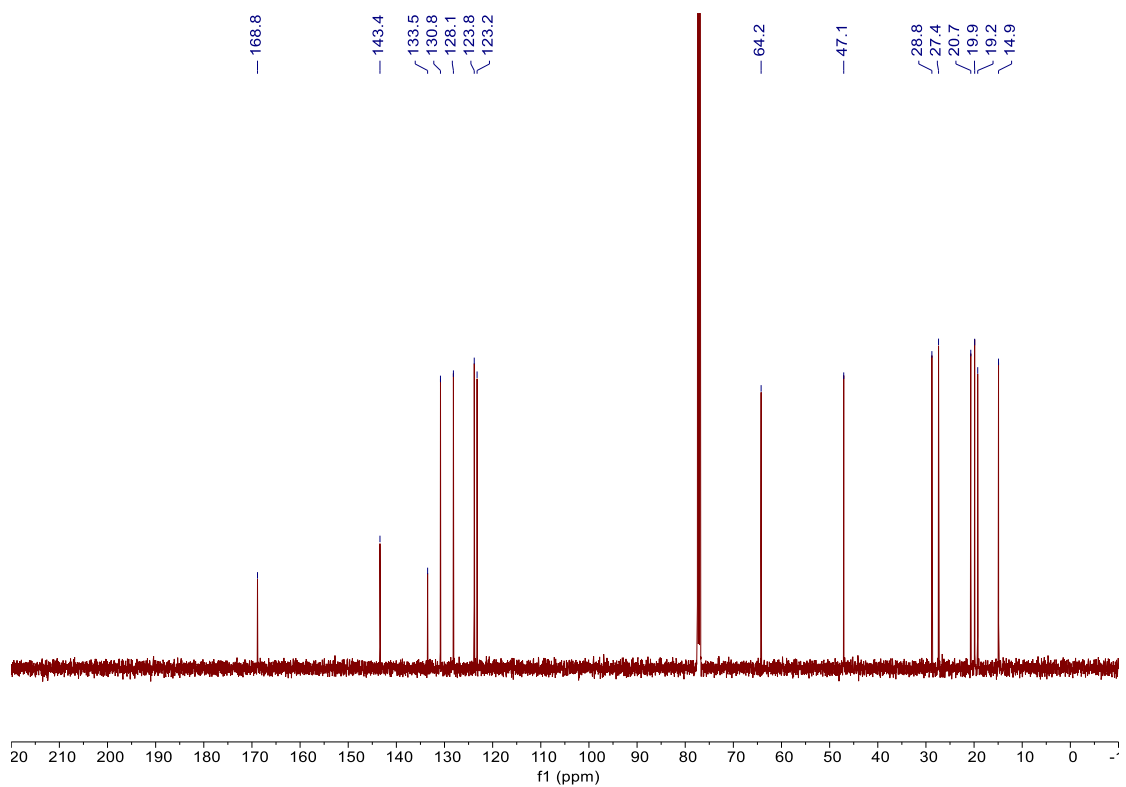



**<sup>1</sup>H NMR of compound 2e (400 MHz in CDCl<sub>3</sub>)**

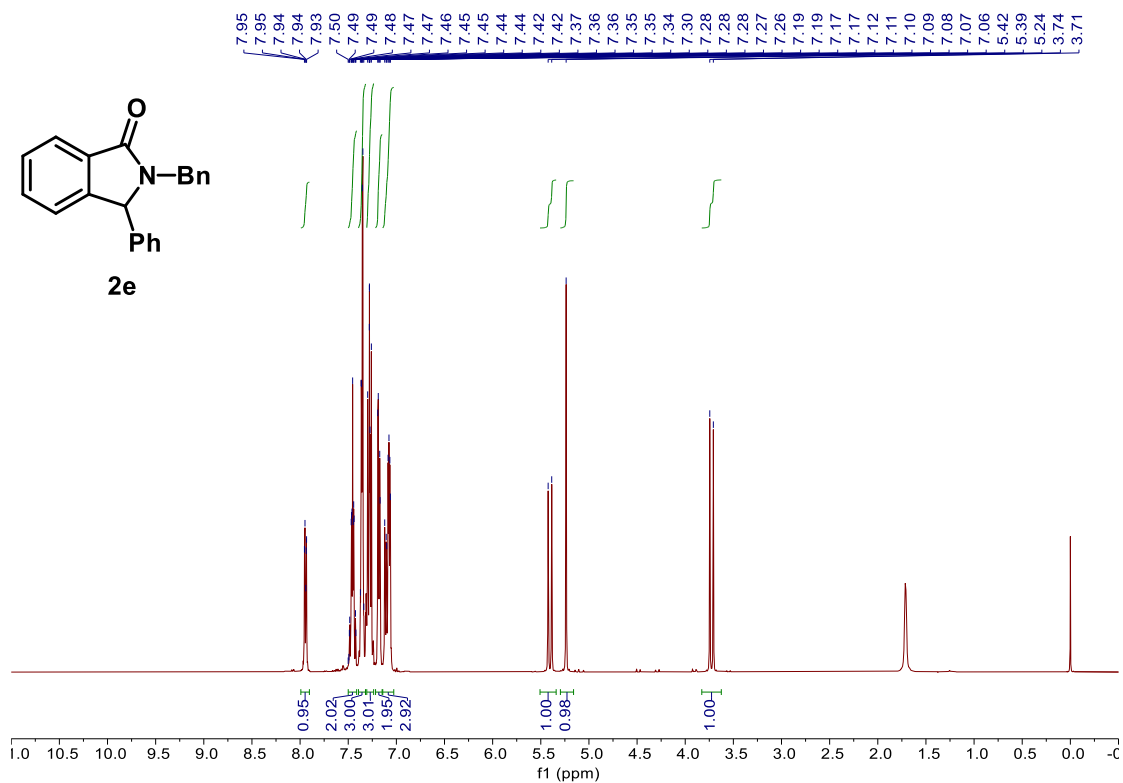

**<sup>13</sup>C NMR of compound 2e (400 MHz in CDCl<sub>3</sub>)**

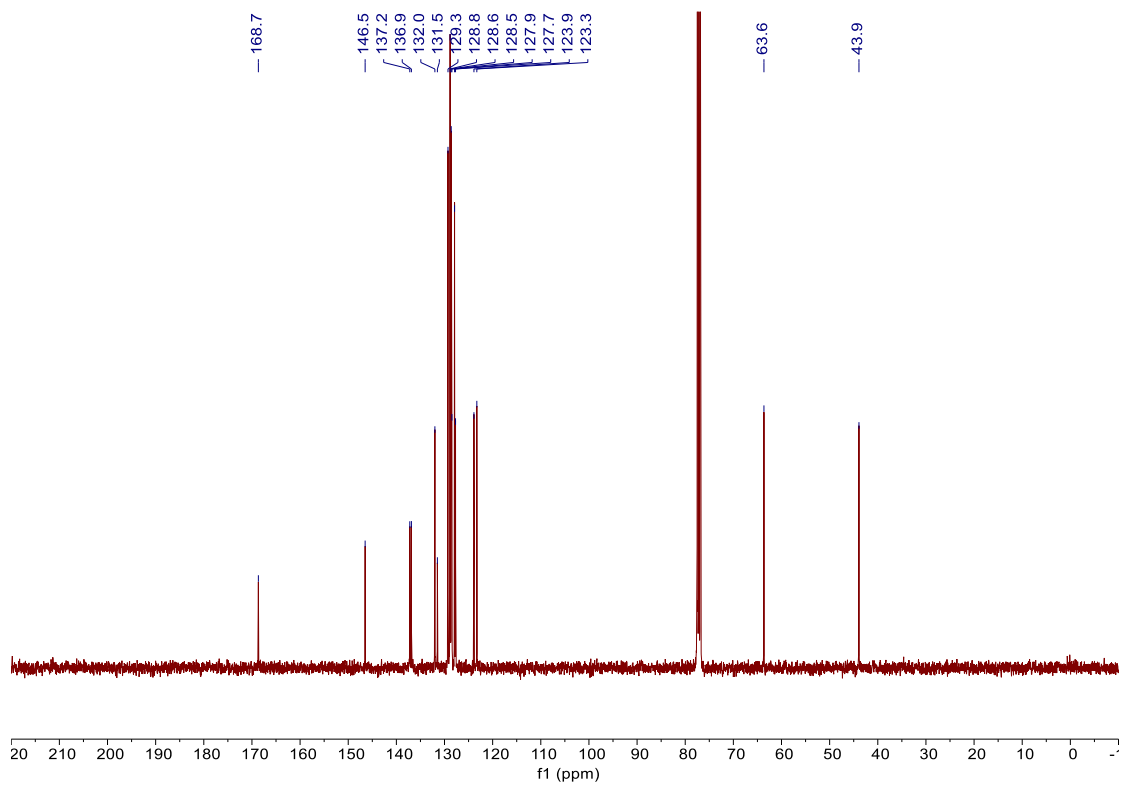

**<sup>1</sup>H NMR of compound 2e (500 MHz in CDCl<sub>3</sub>)**

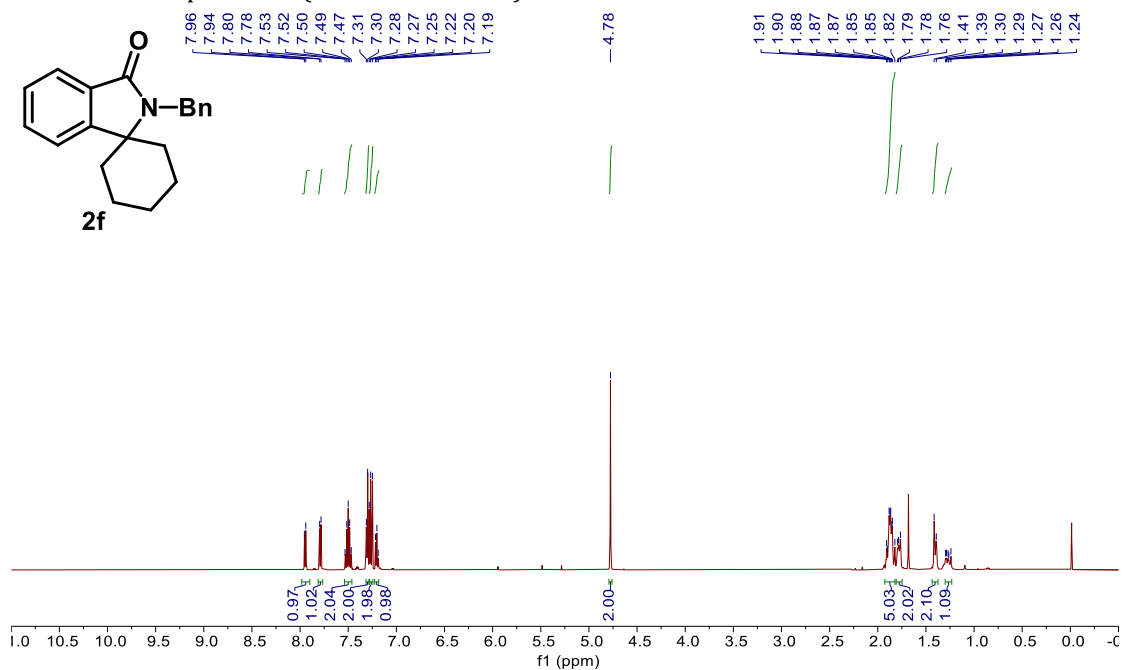

**<sup>13</sup>C NMR of compound 2e (126 MHz in CDCl<sub>3</sub>)**

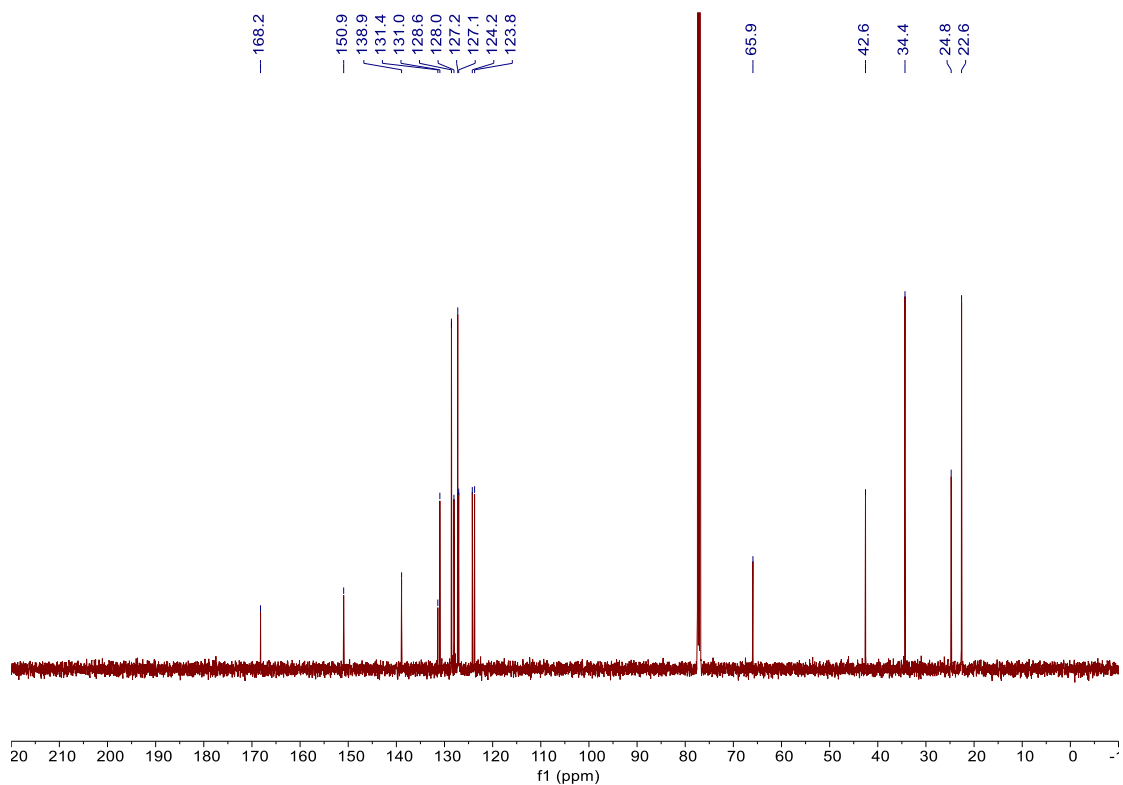

**<sup>1</sup>H NMR of compound 2g (500 MHz in CDCl<sub>3</sub>)**

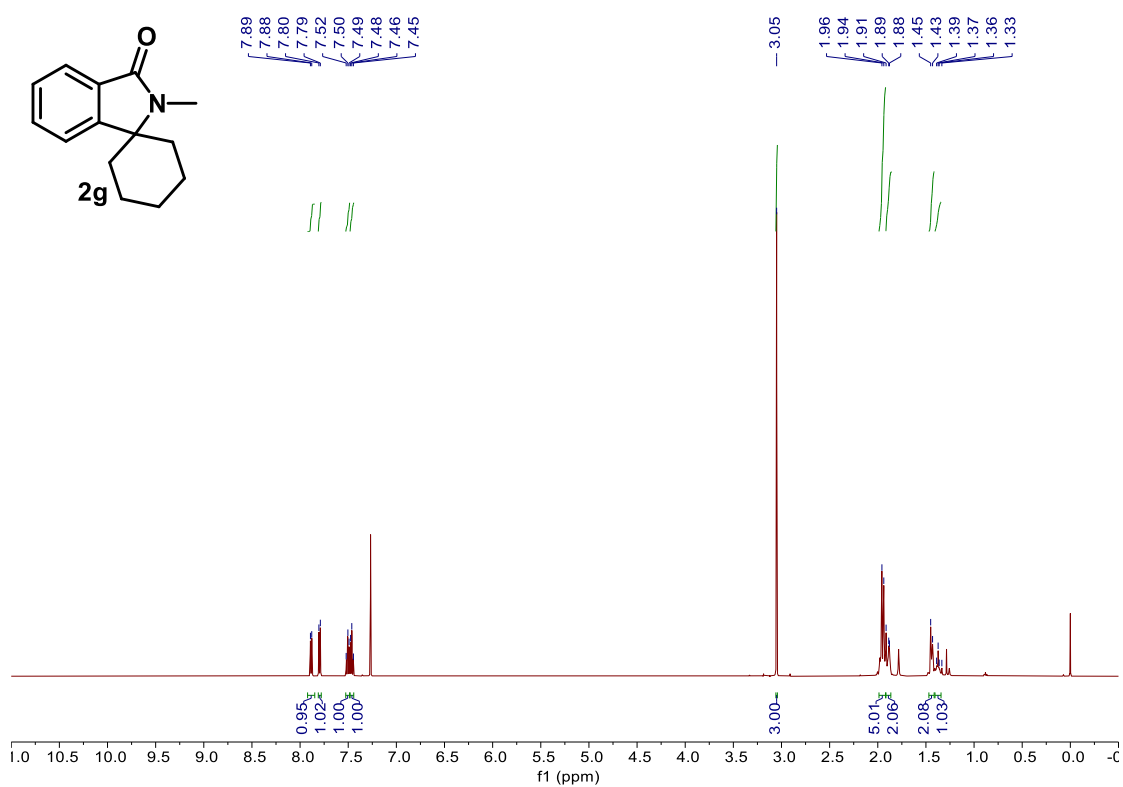

**<sup>13</sup>C NMR of compound 2g (126 MHz in CDCl<sub>3</sub>)**

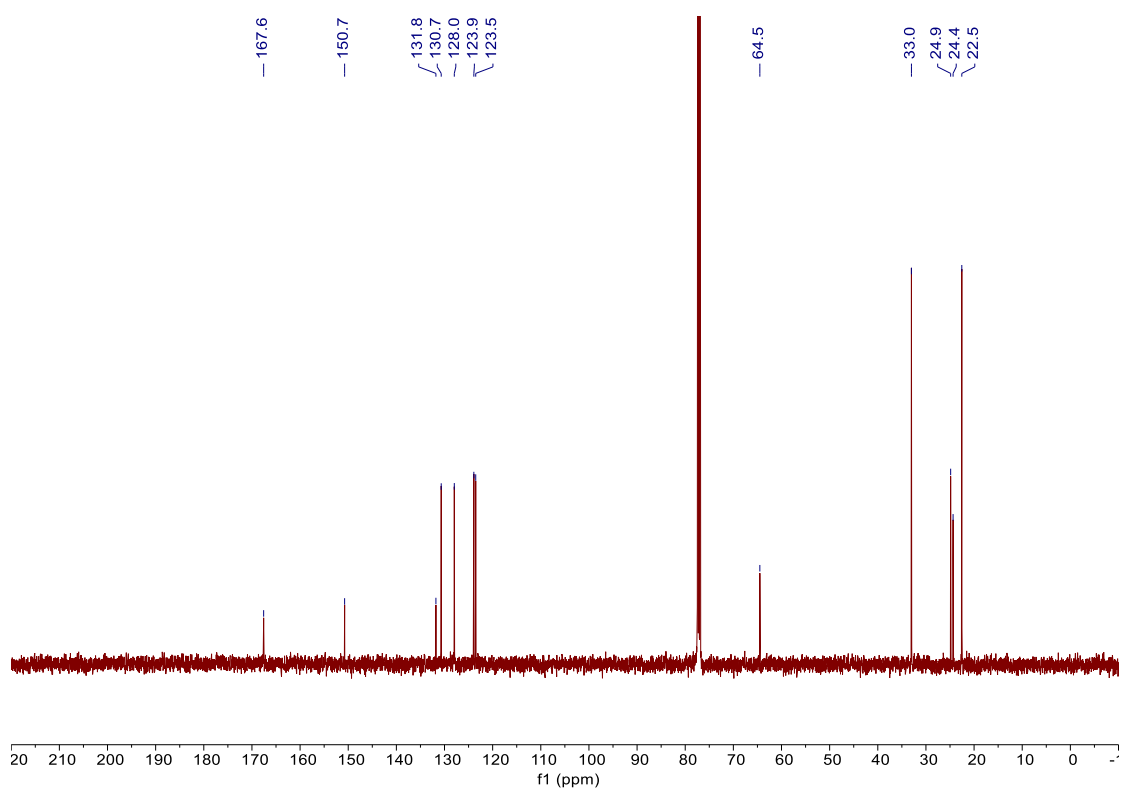

**<sup>1</sup>H NMR of compound 2h (500 MHz in CDCl<sub>3</sub>)**

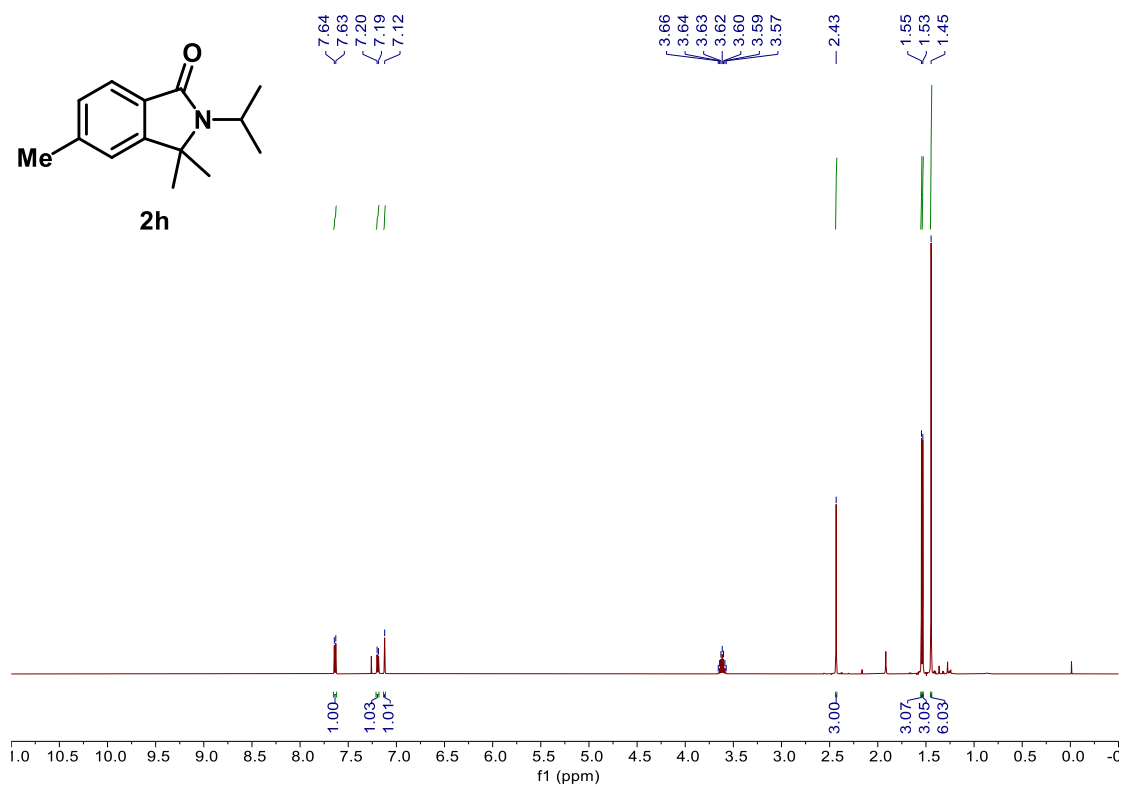

**<sup>13</sup>C NMR of compound 2h (126 MHz in CDCl<sub>3</sub>)**

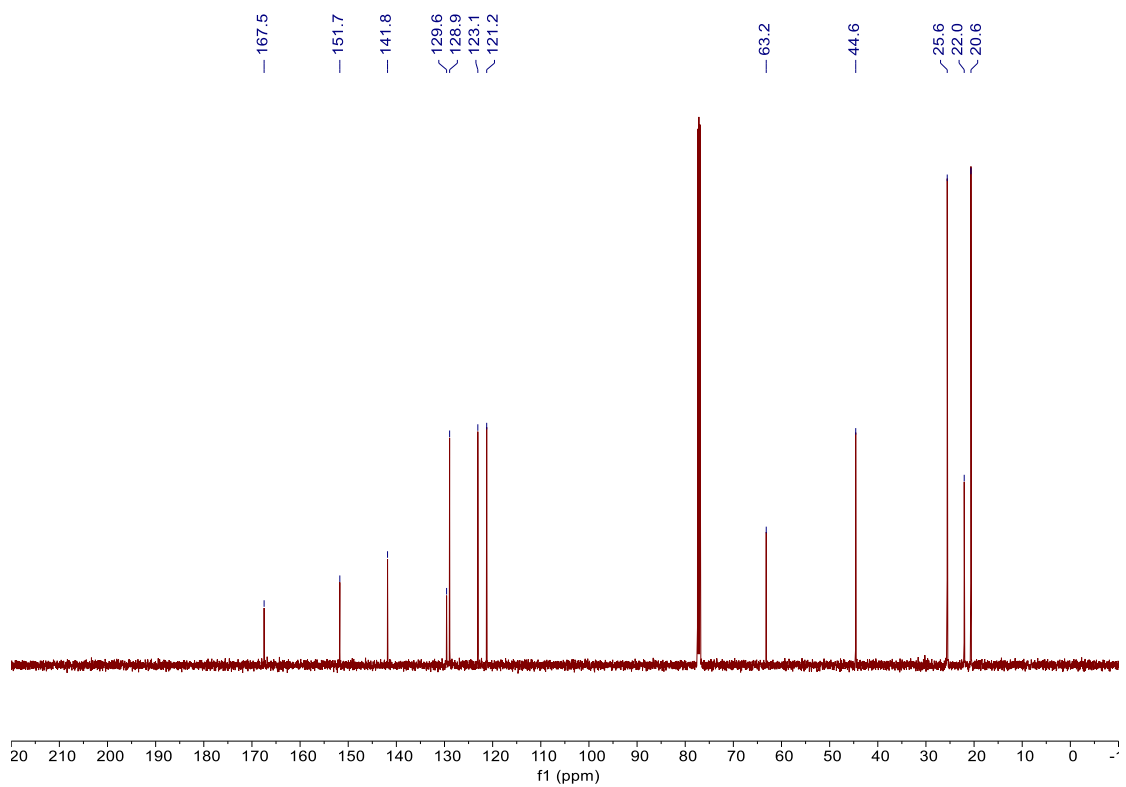

**<sup>1</sup>H NMR of compound 2i (500 MHz in CDCl<sub>3</sub>)**

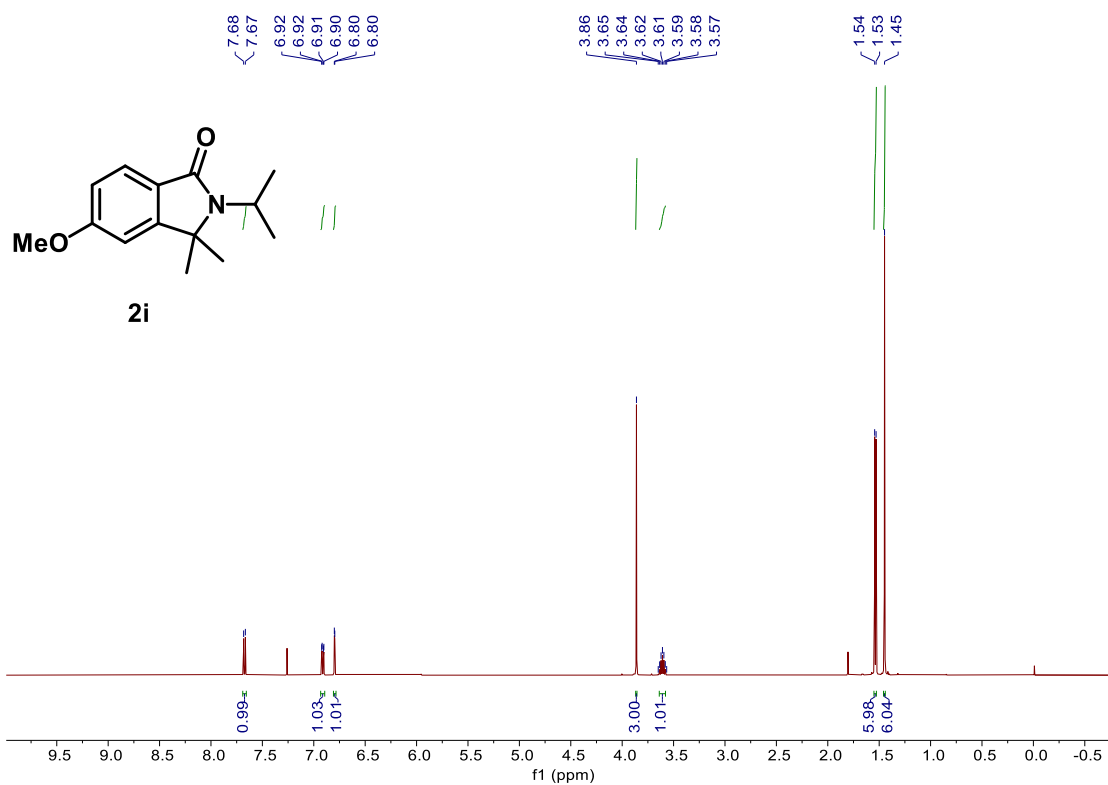

**<sup>13</sup>C NMR of compound 2i (126 MHz in CDCl<sub>3</sub>)**

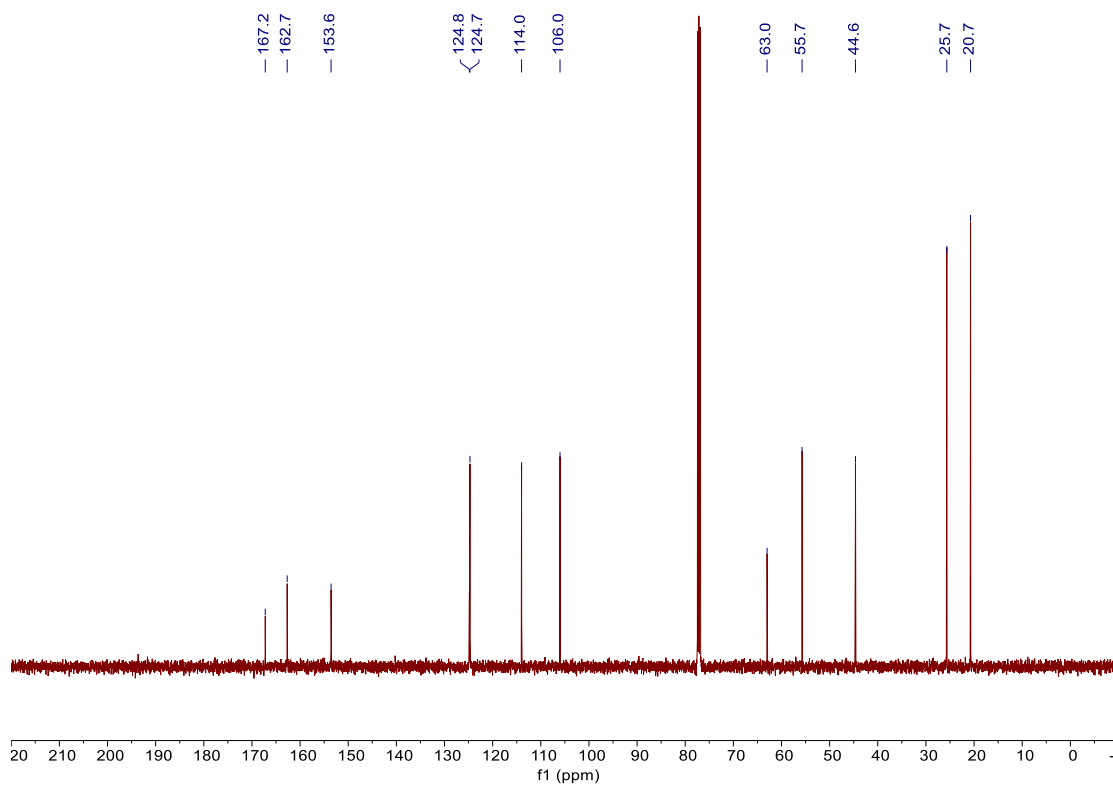

**<sup>1</sup>H NMR of compound 2j (500 MHz in CDCl<sub>3</sub>)**

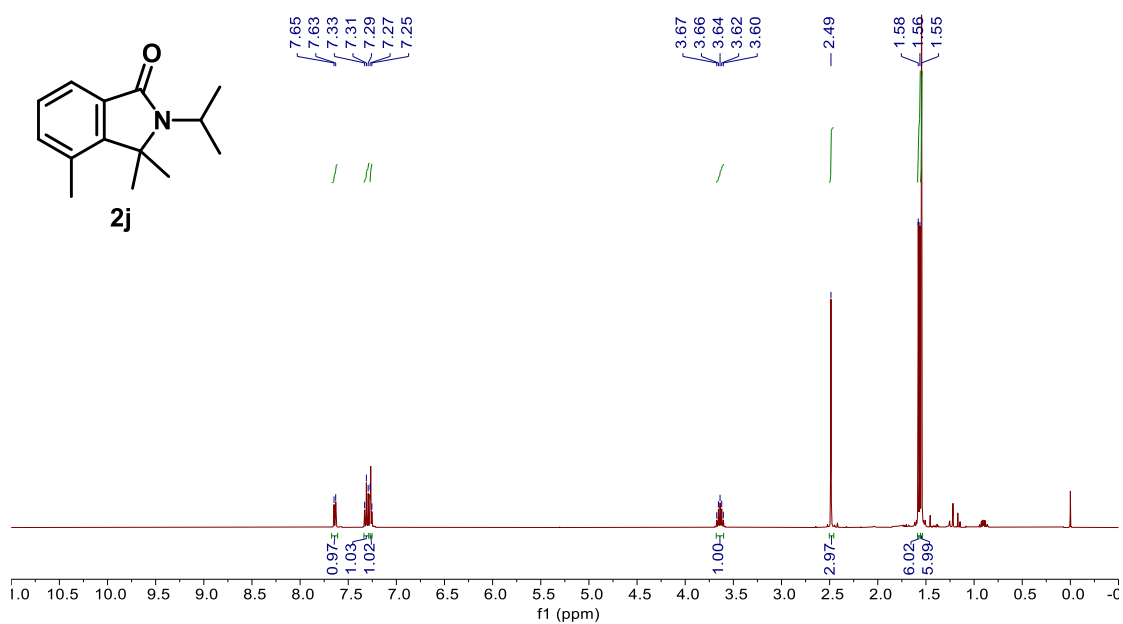

**<sup>13</sup>C NMR of compound 2j (151 MHz in CDCl<sub>3</sub>)**

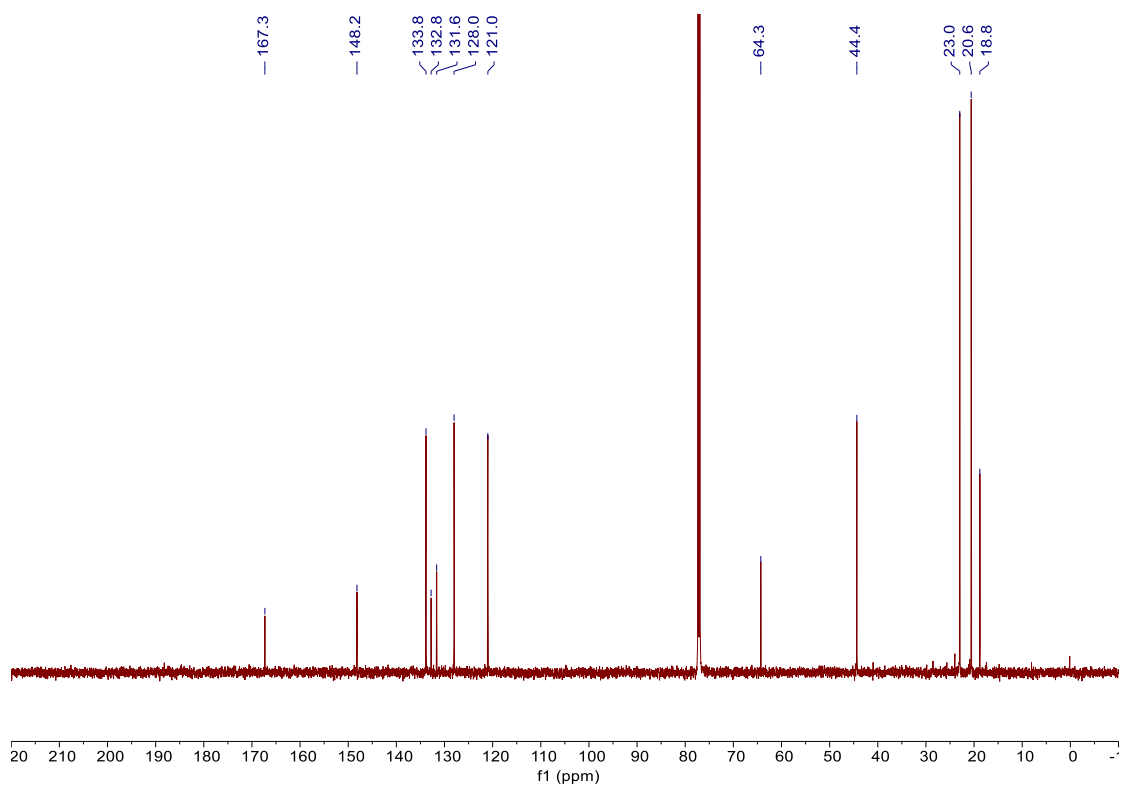

**<sup>1</sup>H NMR of compound 2j' (600 MHz in CDCl<sub>3</sub>)**

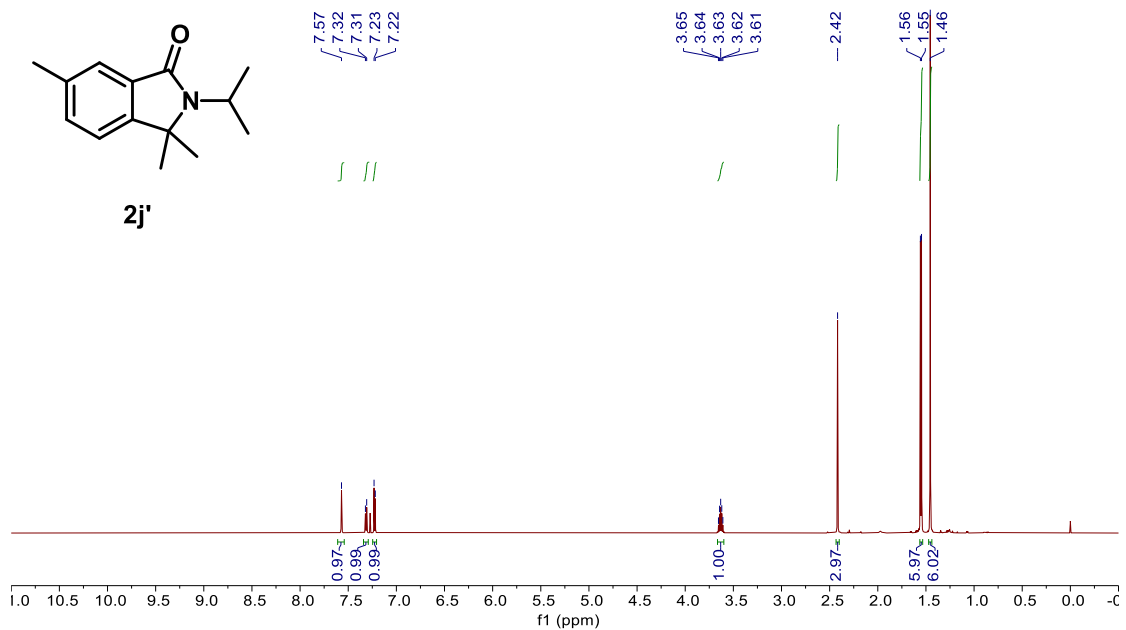

**<sup>13</sup>C NMR of compound 2j' (600 MHz in CDCl<sub>3</sub>)**

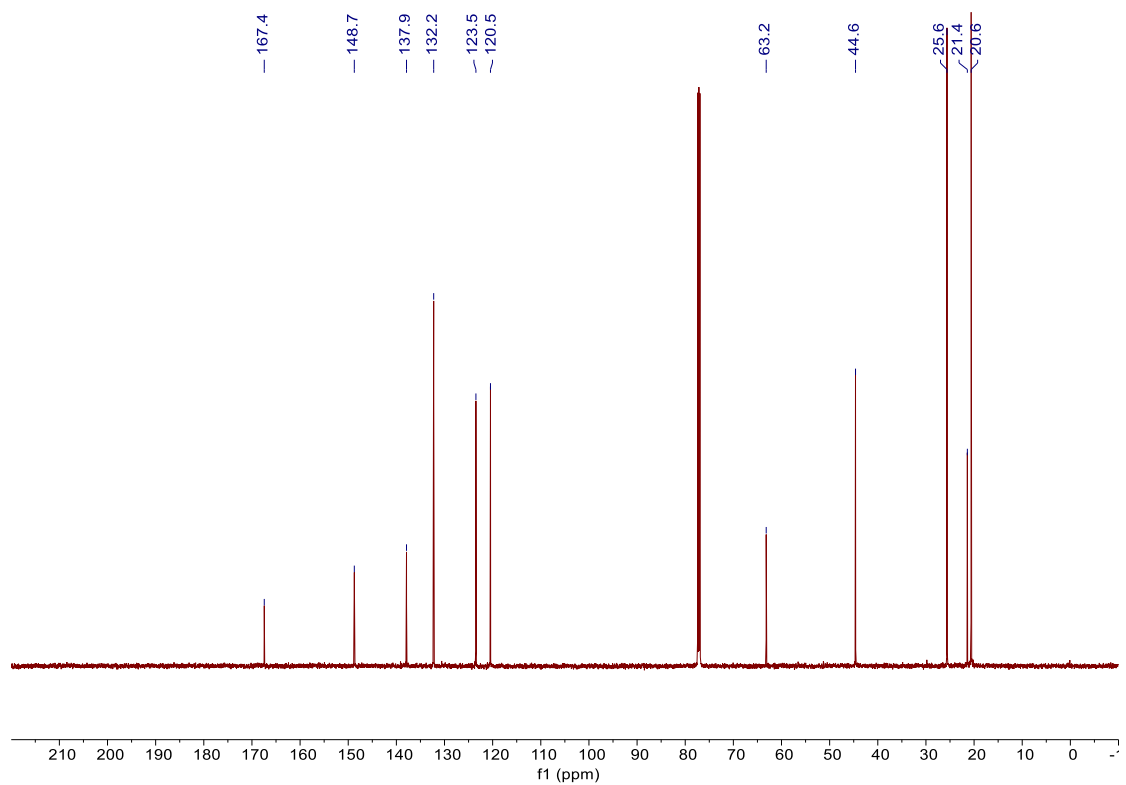

<sup>1</sup>H NMR of compound **2k** (500 MHz in CDCl<sub>3</sub>)

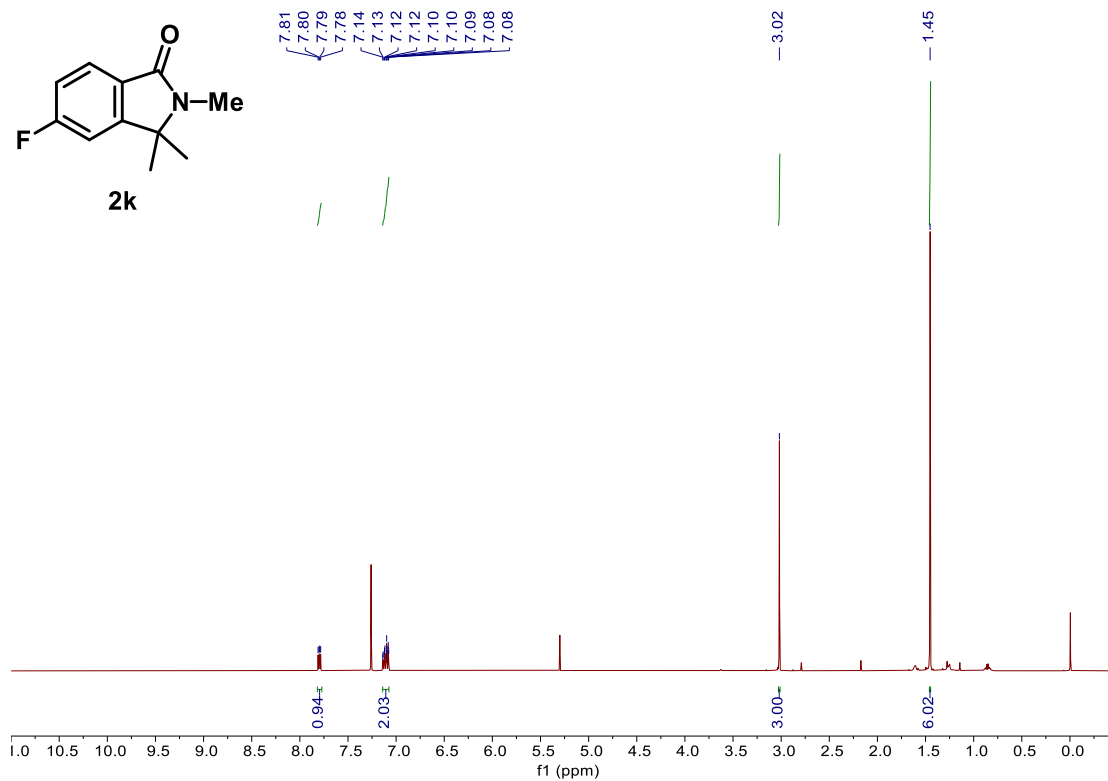

<sup>13</sup>C NMR of compound **2k** (126 MHz in CDCl<sub>3</sub>)

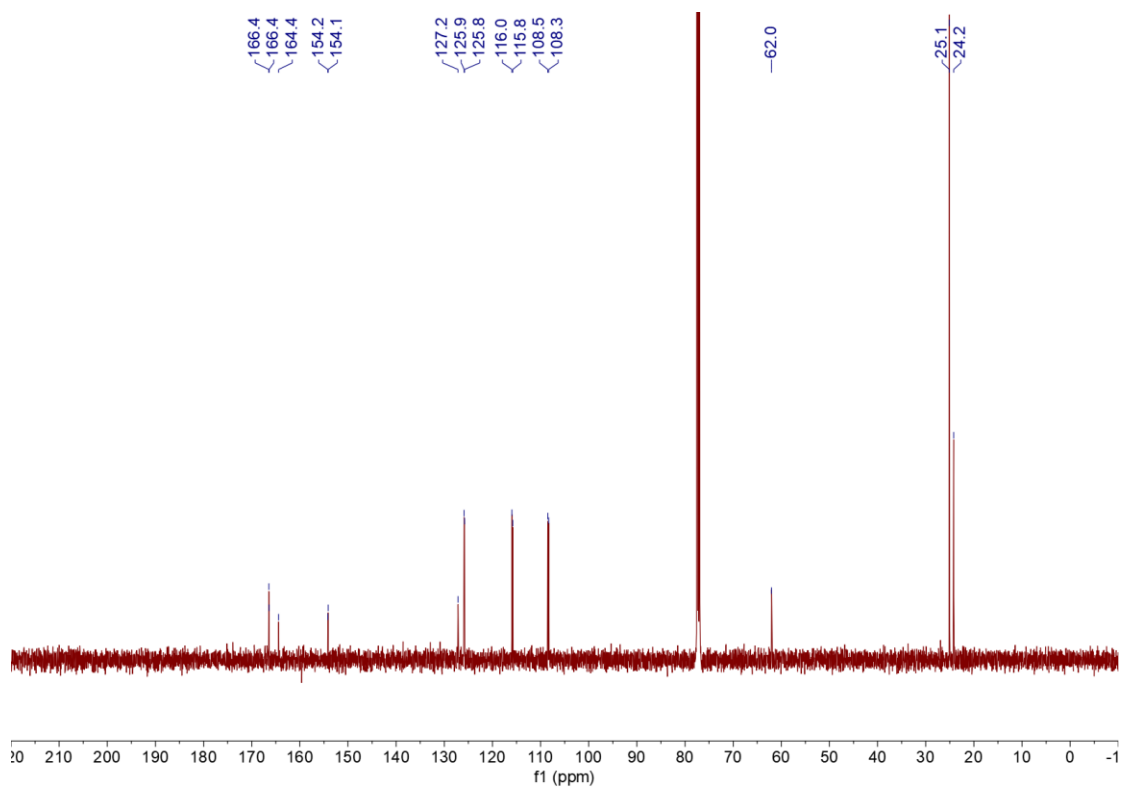



**<sup>19</sup>F NMR of compound 2k (471 MHz in CDCl<sub>3</sub>)**

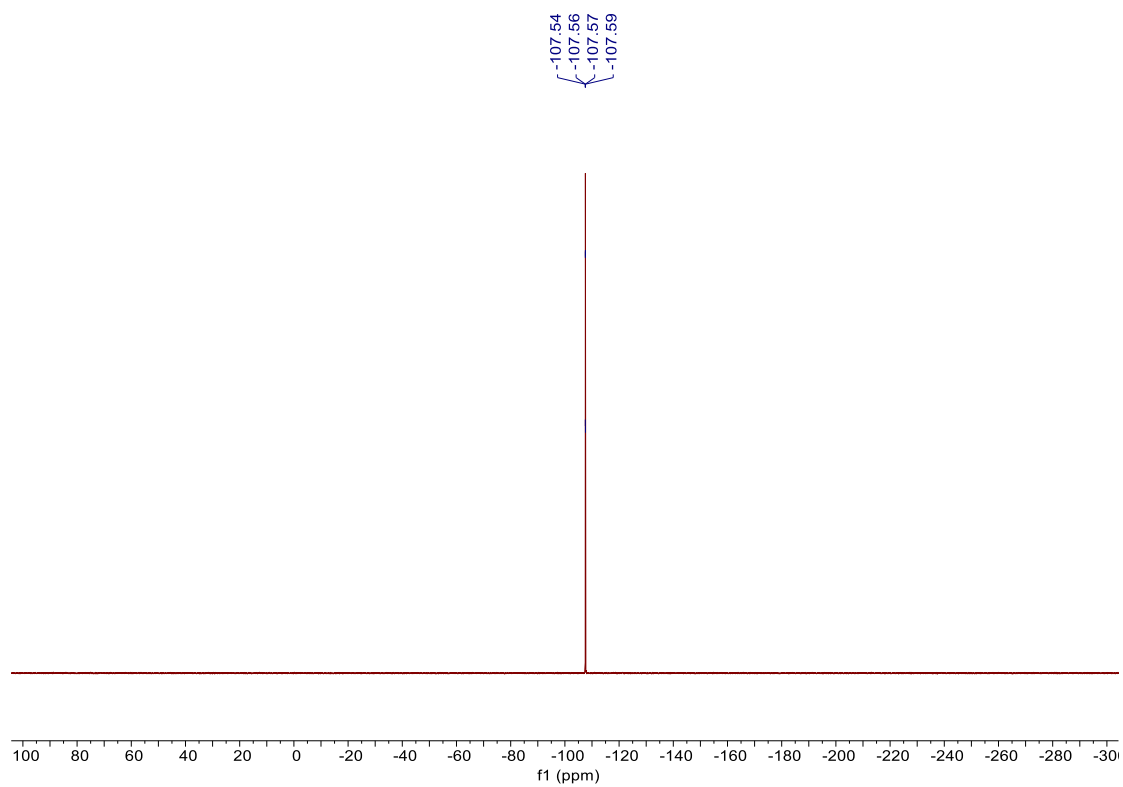

**<sup>1</sup>H NMR of compound 2I (500 MHz in CDCl<sub>3</sub>)**

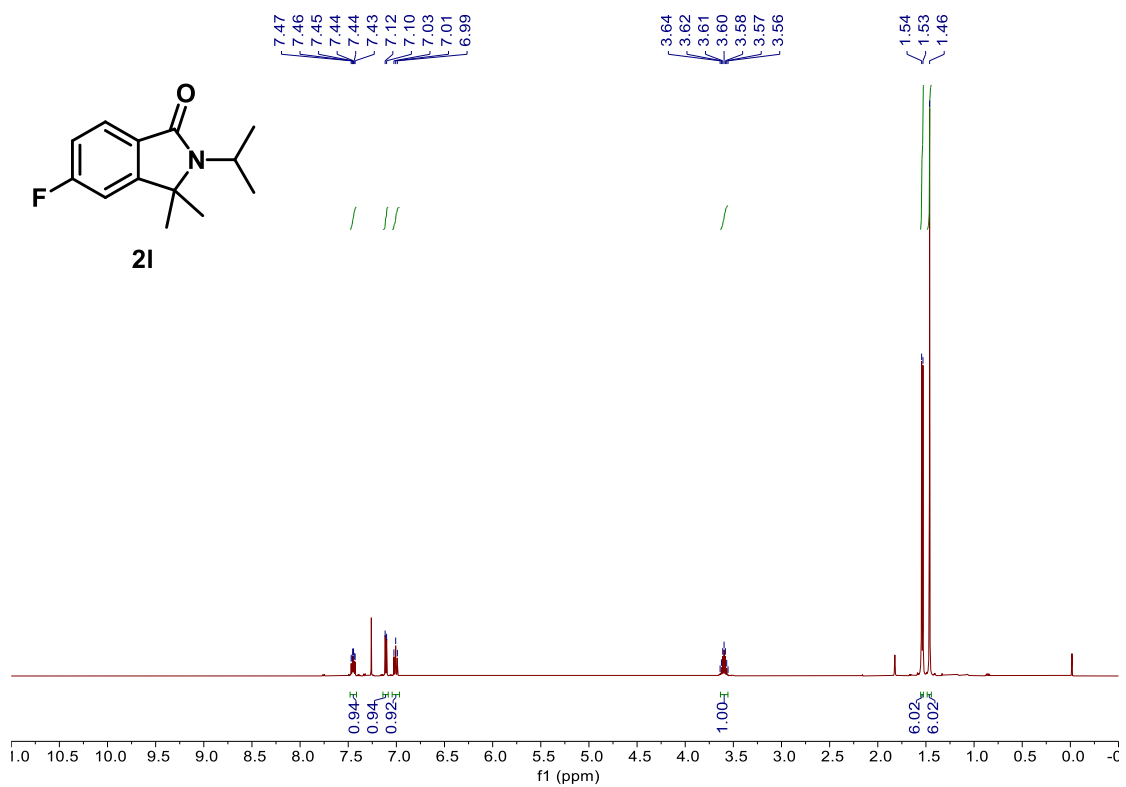

**<sup>13</sup>C NMR of compound 2I (126 MHz in CDCl<sub>3</sub>)**

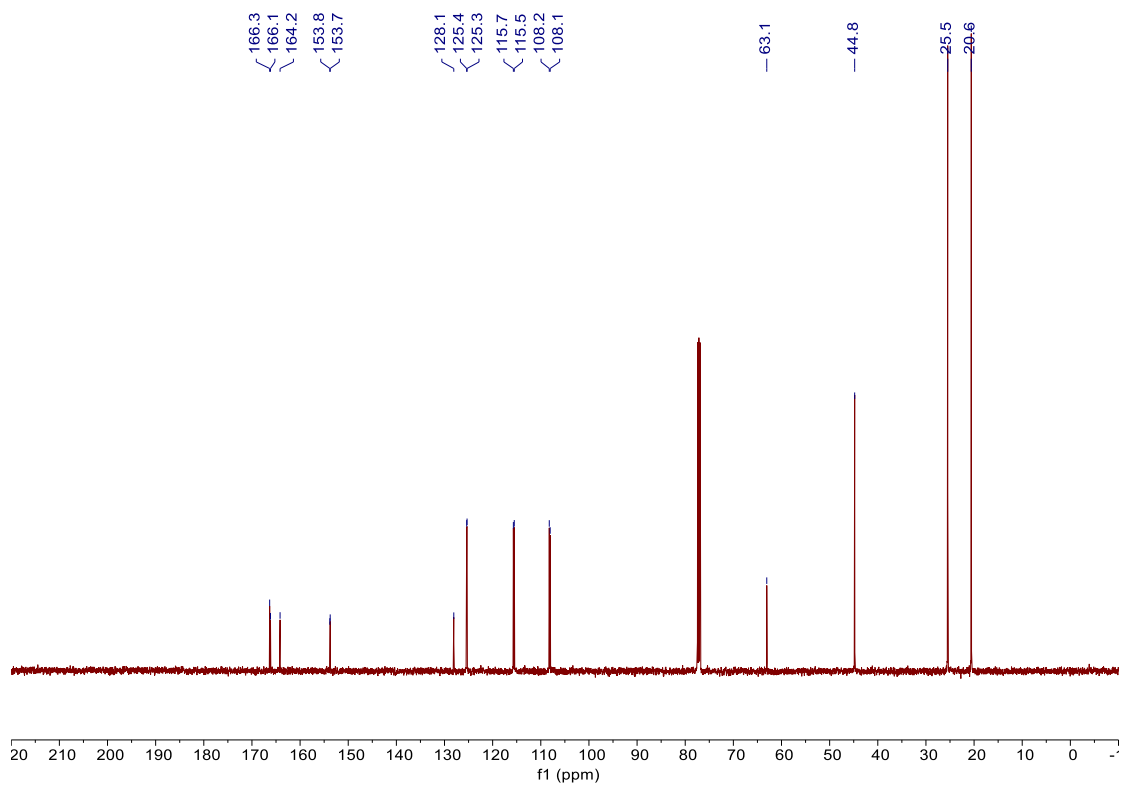

**<sup>19</sup>F NMR of compound 2I (471 MHz in CDCl<sub>3</sub>)**

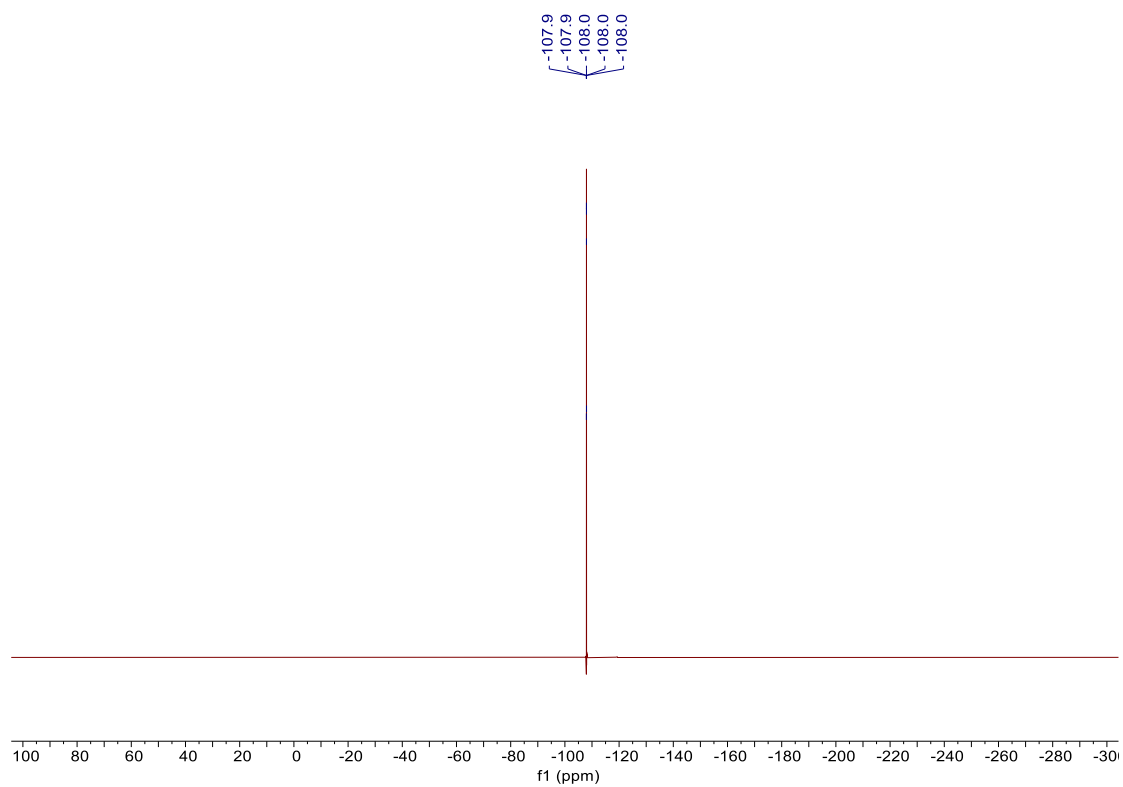

**<sup>1</sup>H NMR of compound 2m (500 MHz in CDCl<sub>3</sub>)**

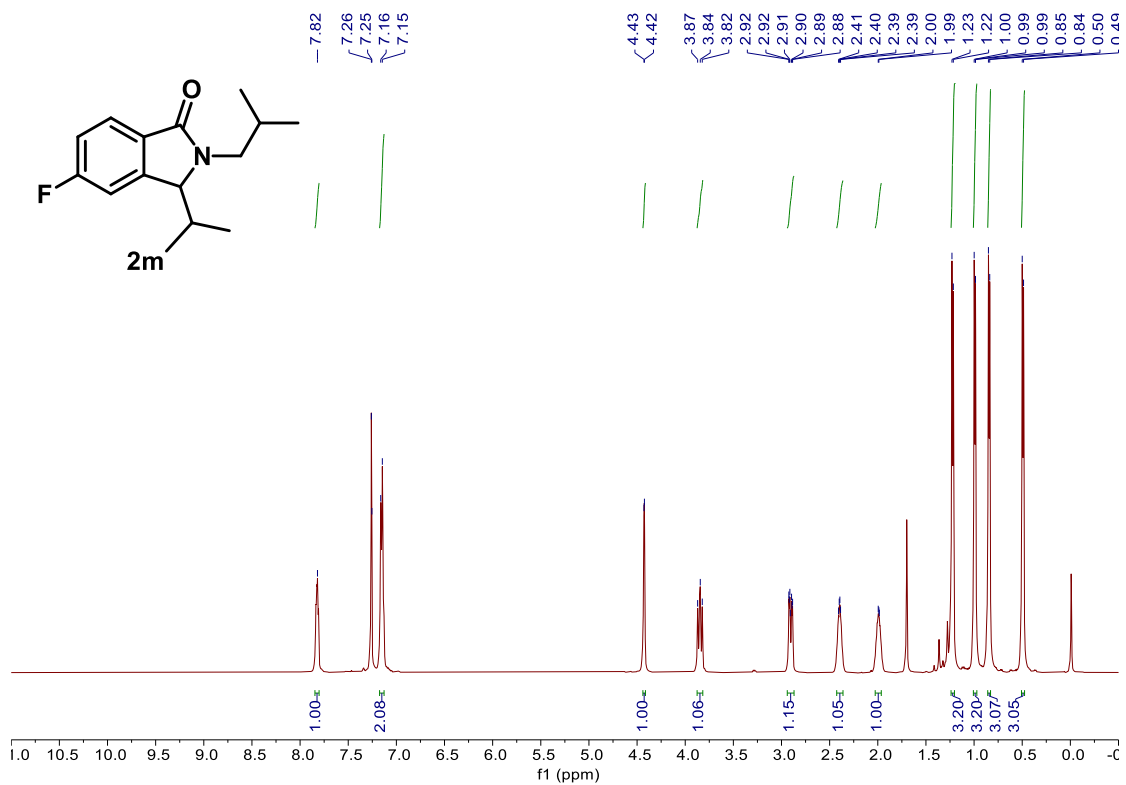

**<sup>13</sup>C NMR of compound 2m (126 MHz in CDCl<sub>3</sub>)**

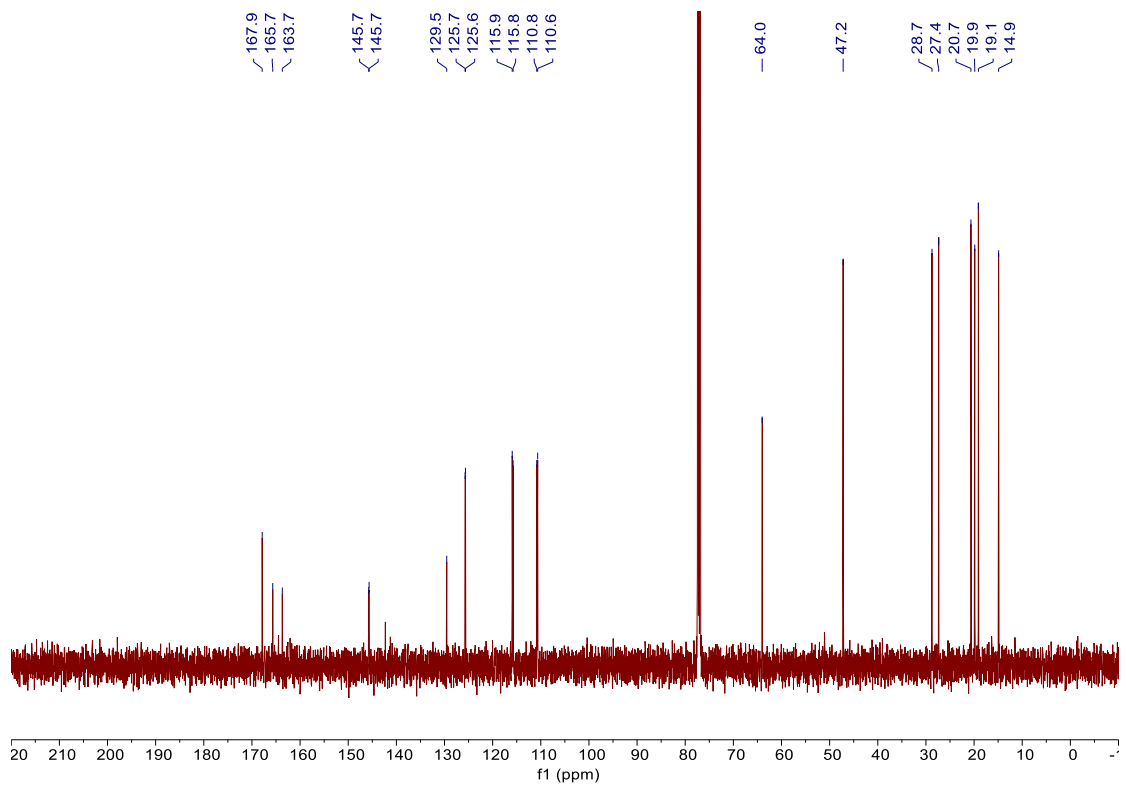

**<sup>19</sup>F NMR** of compound **2m** (471 MHz in CDCl<sub>3</sub>)

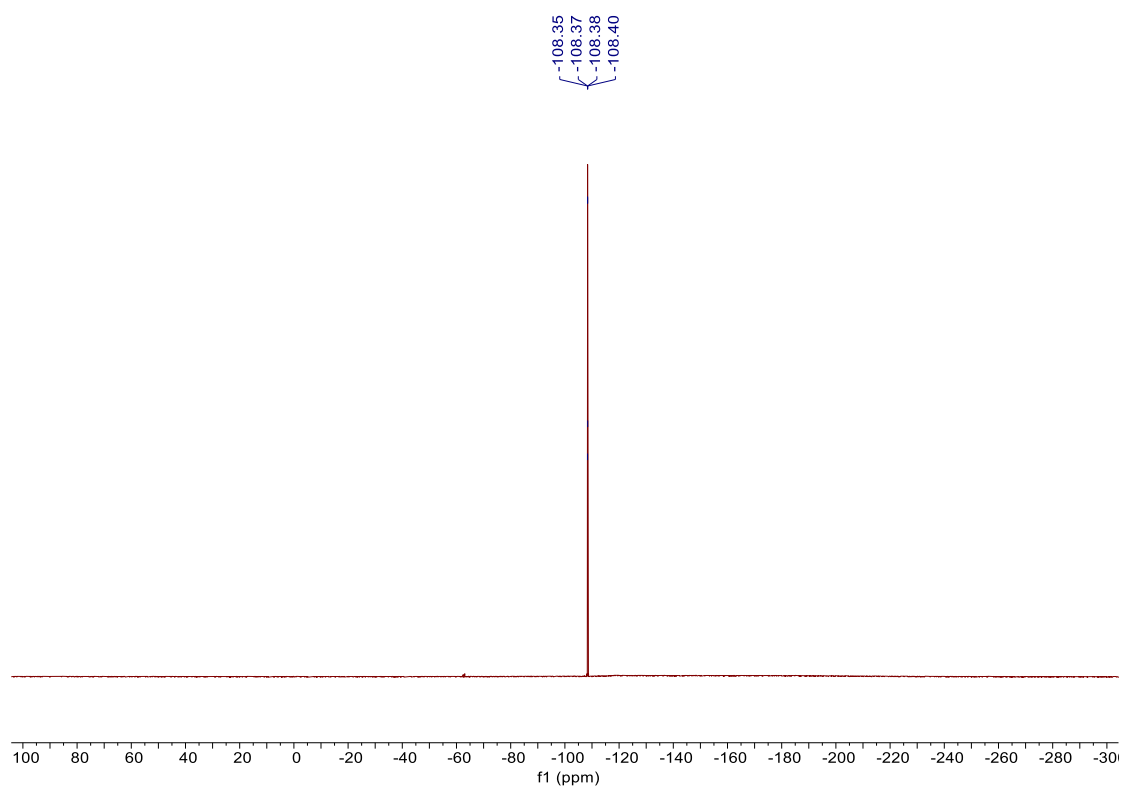

**<sup>1</sup>H NMR of compound 2n (500 MHz in CDCl<sub>3</sub>)**

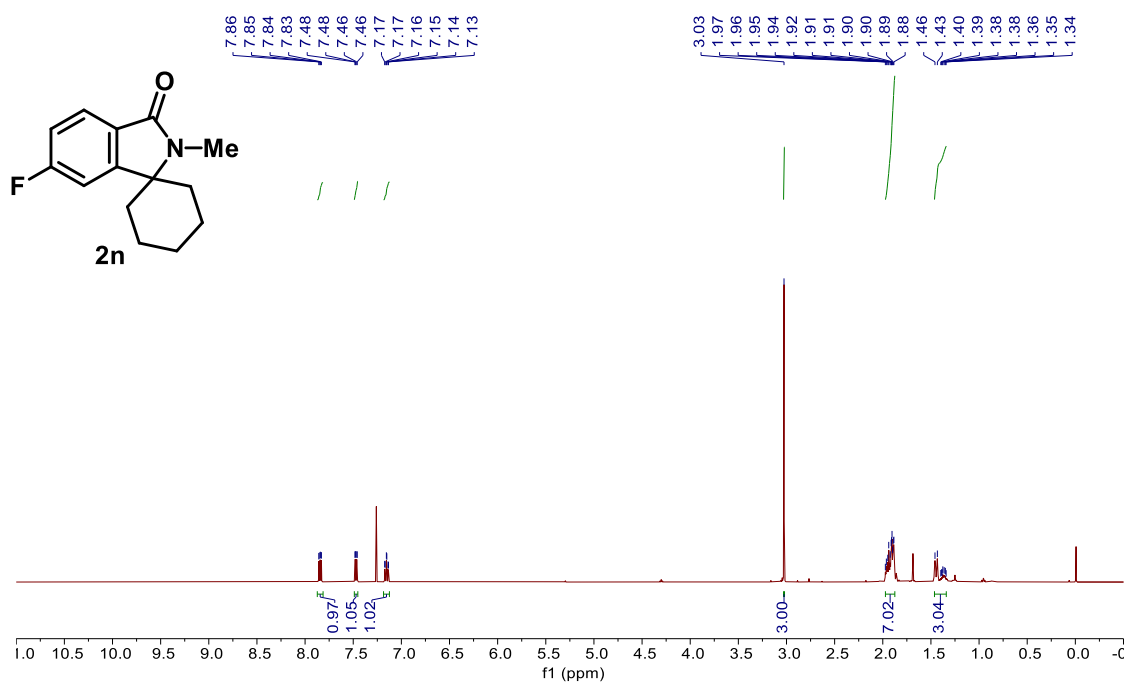

**<sup>13</sup>C NMR of compound 2n (126 MHz in CDCl<sub>3</sub>)**

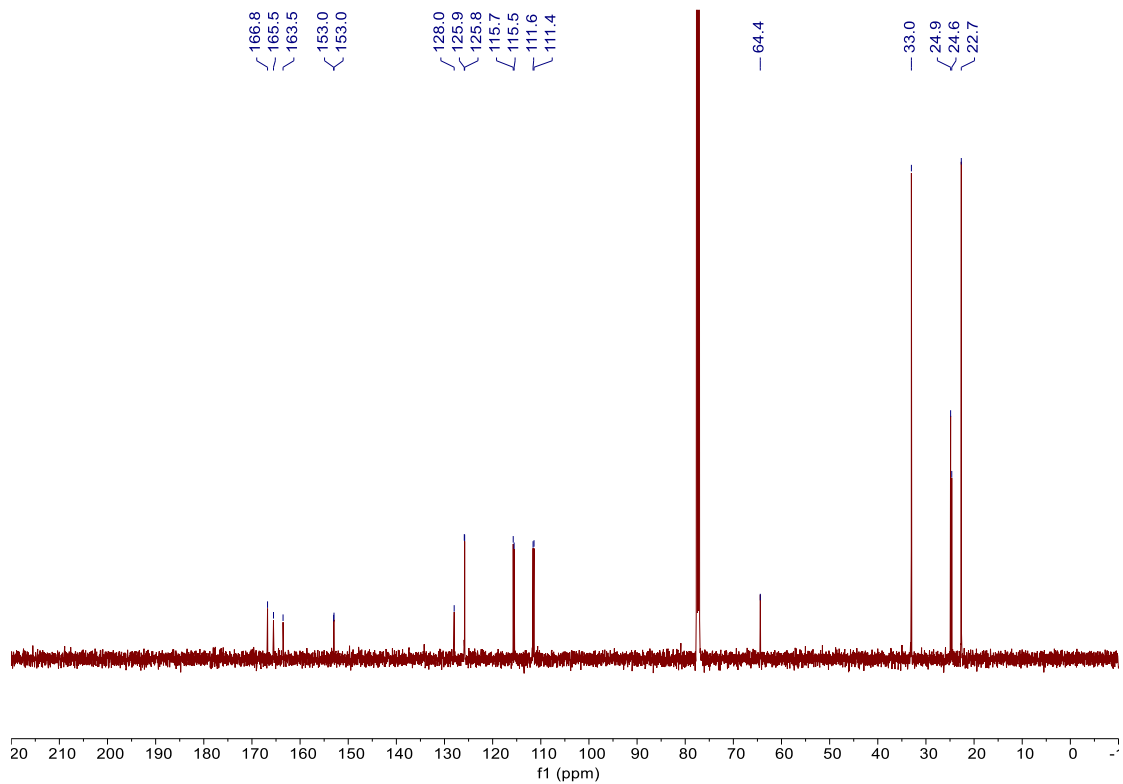

**<sup>19</sup>F NMR** of compound **2n** (471 MHz in CDCl<sub>3</sub>)

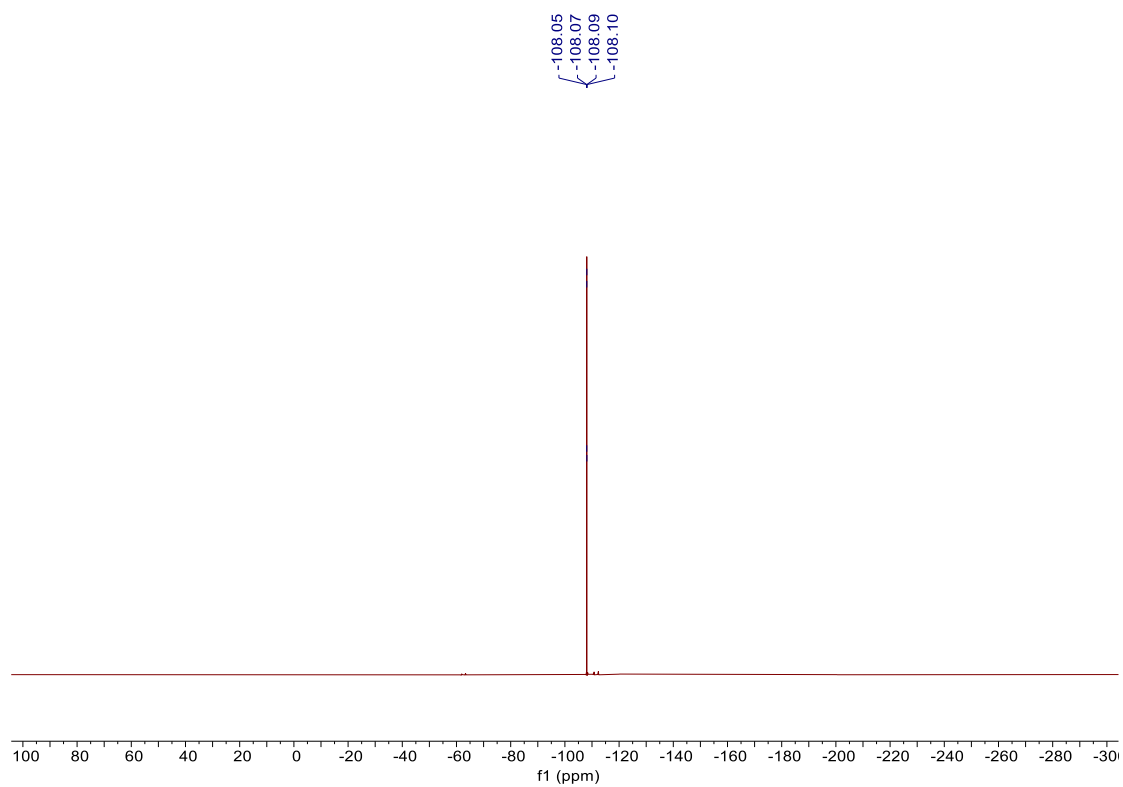

<sup>1</sup>H NMR of compound **2o** (500 MHz in CDCl<sub>3</sub>)

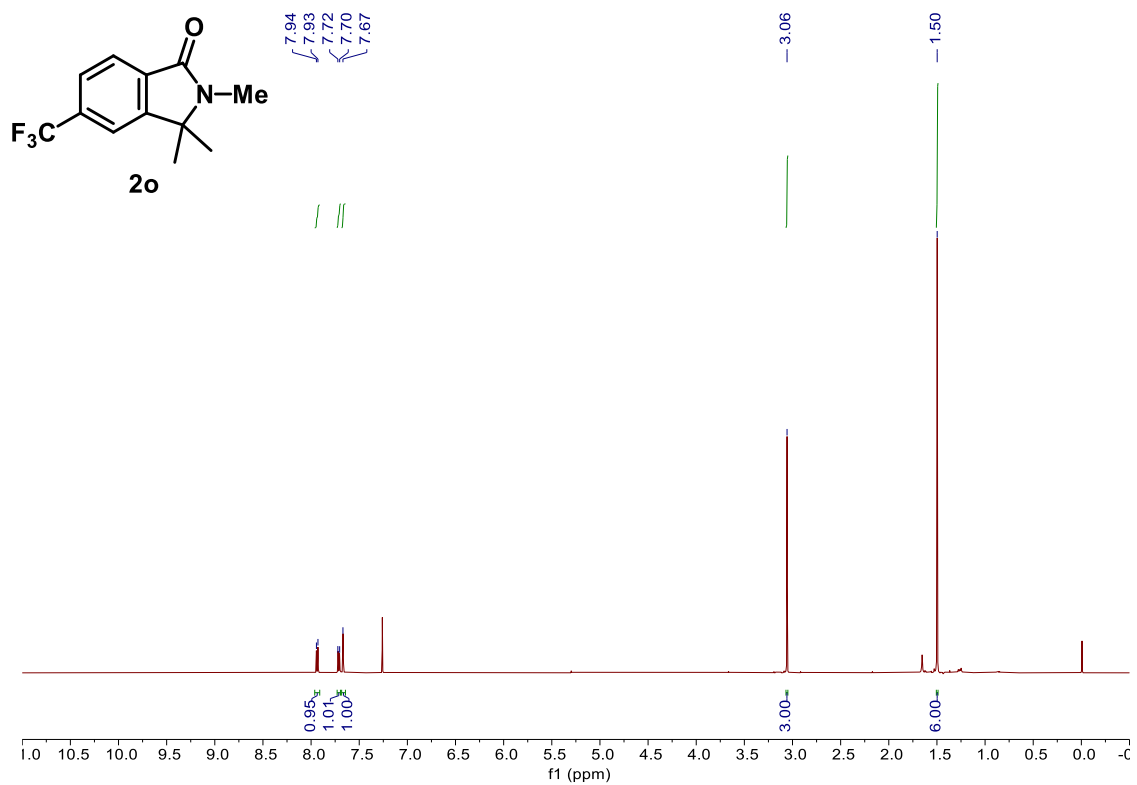

<sup>13</sup>C NMR of compound **2o** (126 MHz in CDCl<sub>3</sub>)

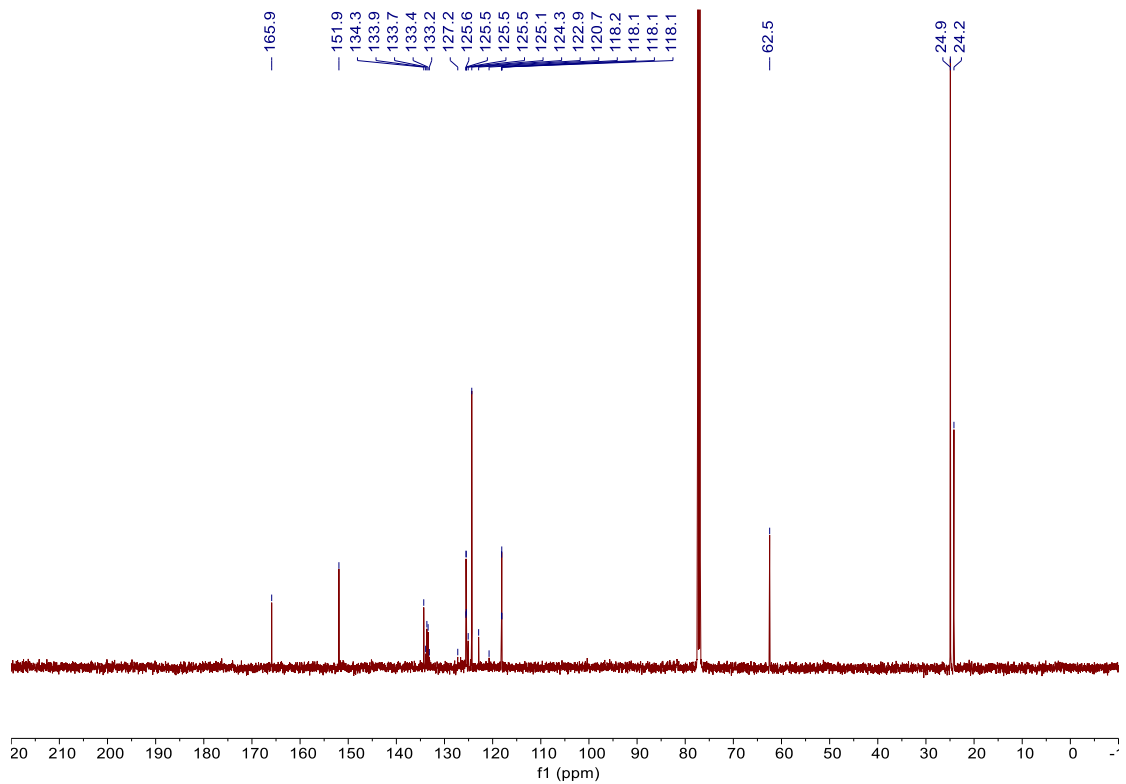



**$^{19}\text{F}$  NMR of compound **2o** (471 MHz in  $\text{CDCl}_3$ )**

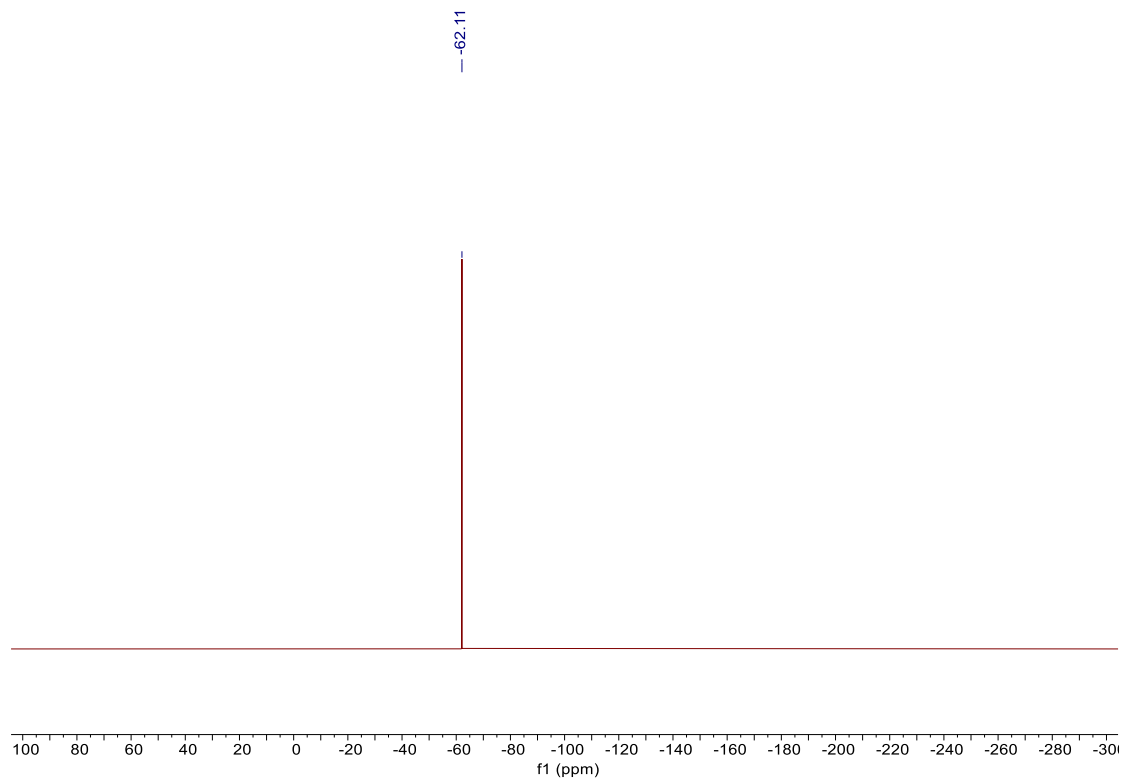

**<sup>1</sup>H NMR of compound 2p (500 MHz in CDCl<sub>3</sub>)**

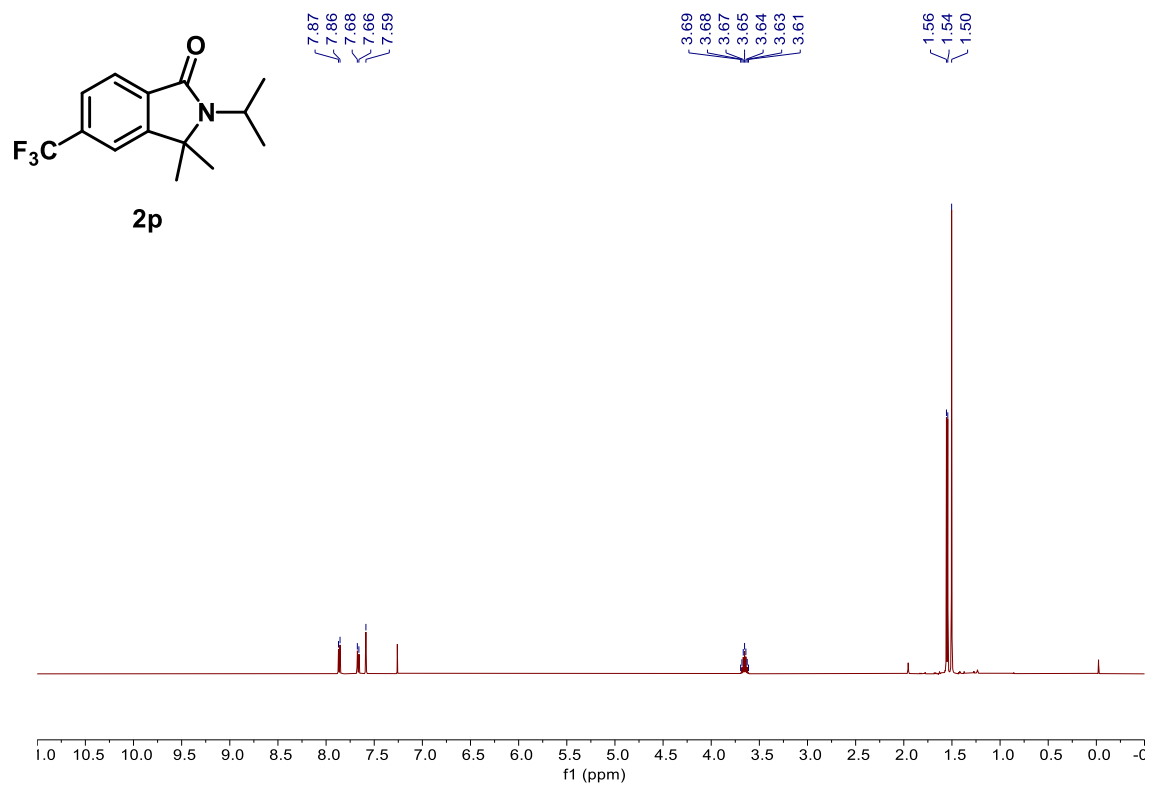

**<sup>13</sup>C NMR of compound 2p (126 MHz in CDCl<sub>3</sub>)**

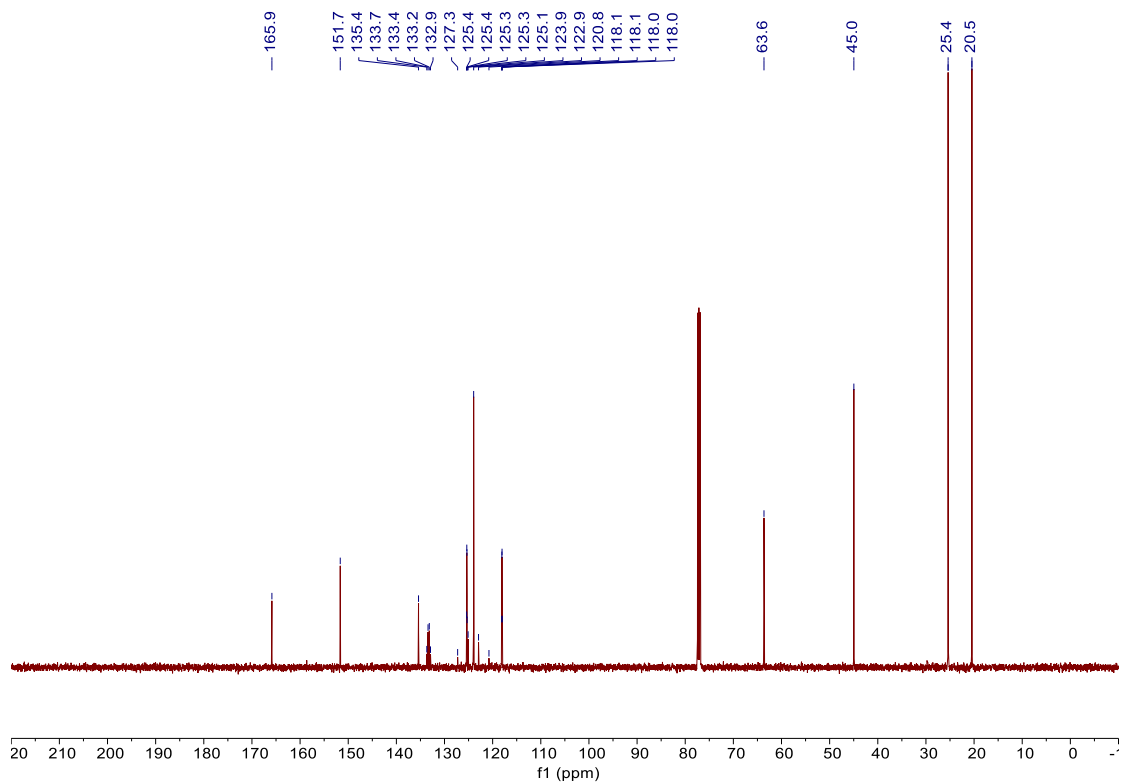

**<sup>19</sup>F NMR of compound 2p (471 MHz in CDCl<sub>3</sub>)**

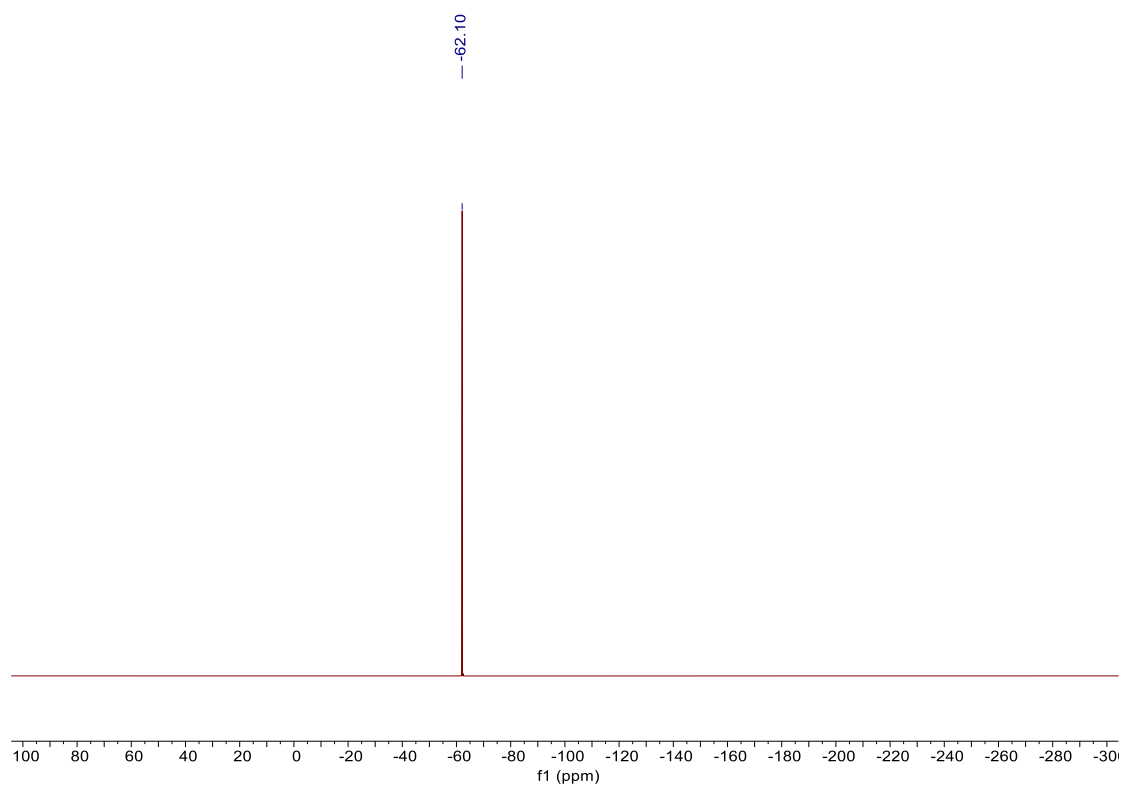

**<sup>1</sup>H NMR of compound 2q (500 MHz in CDCl<sub>3</sub>)**

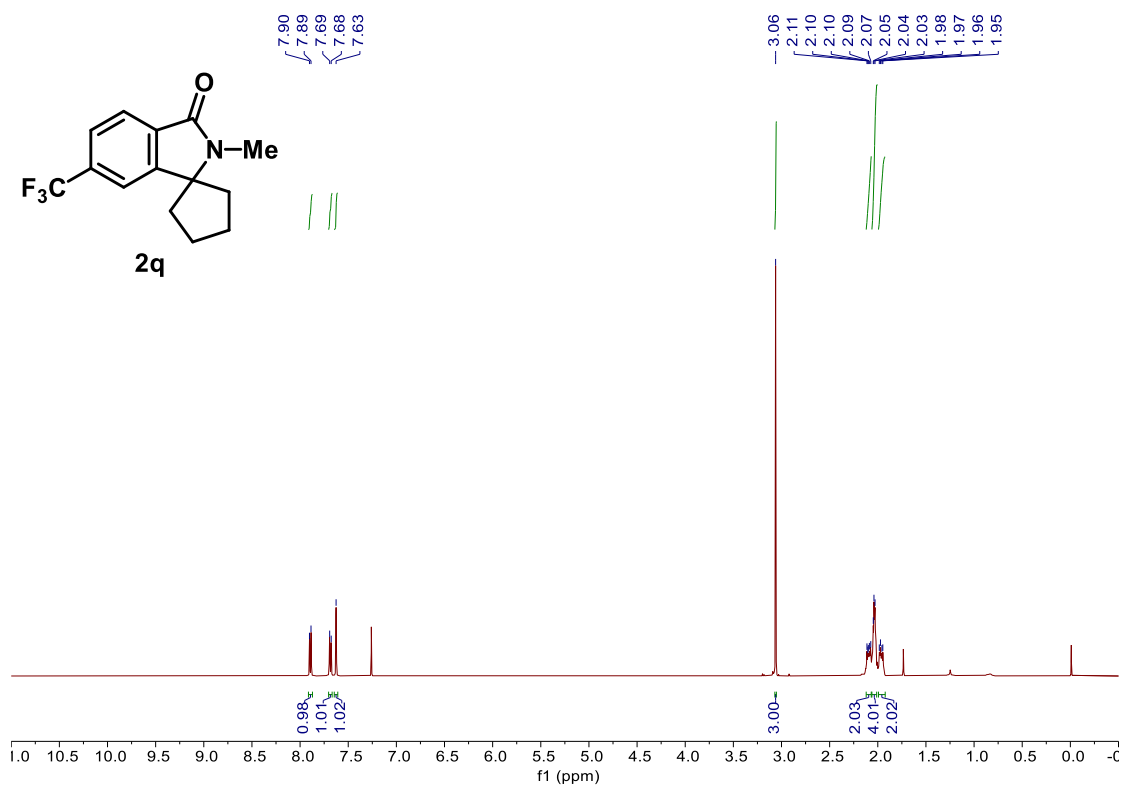

**<sup>13</sup>C NMR of compound 2q (126 MHz in CDCl<sub>3</sub>)**

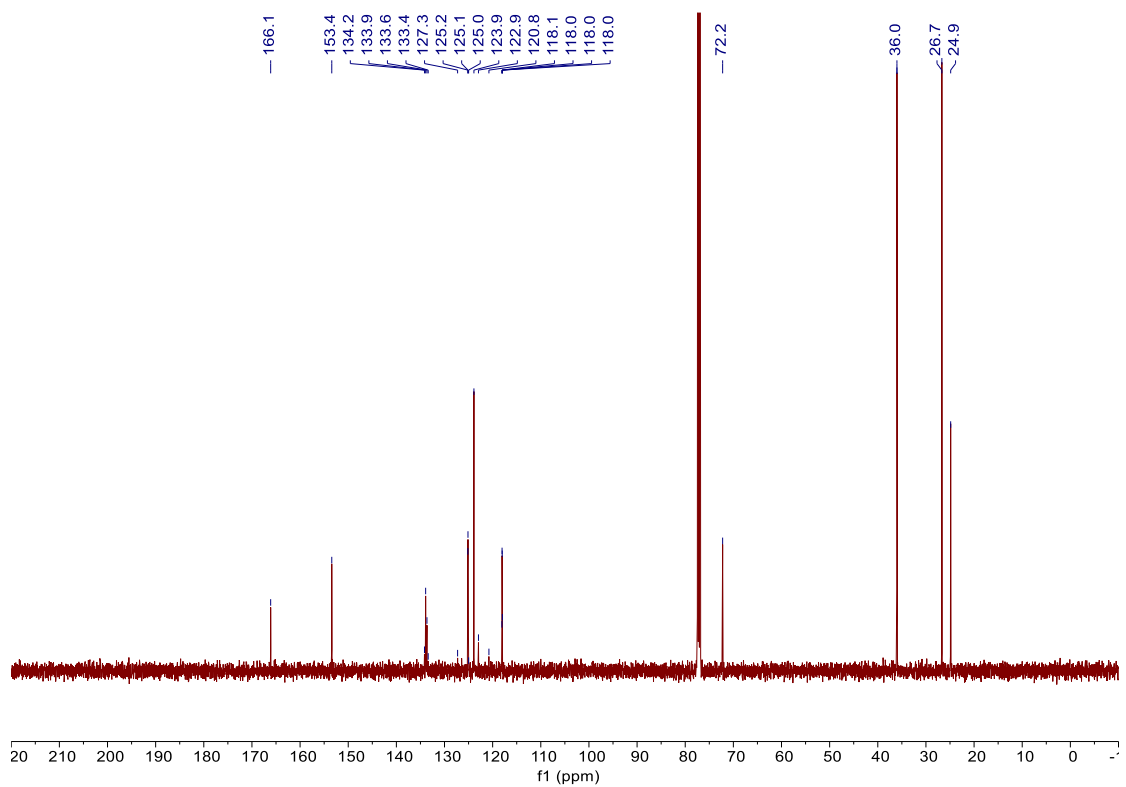

**<sup>19</sup>F NMR of compound 2q (471 MHz in CDCl<sub>3</sub>)**

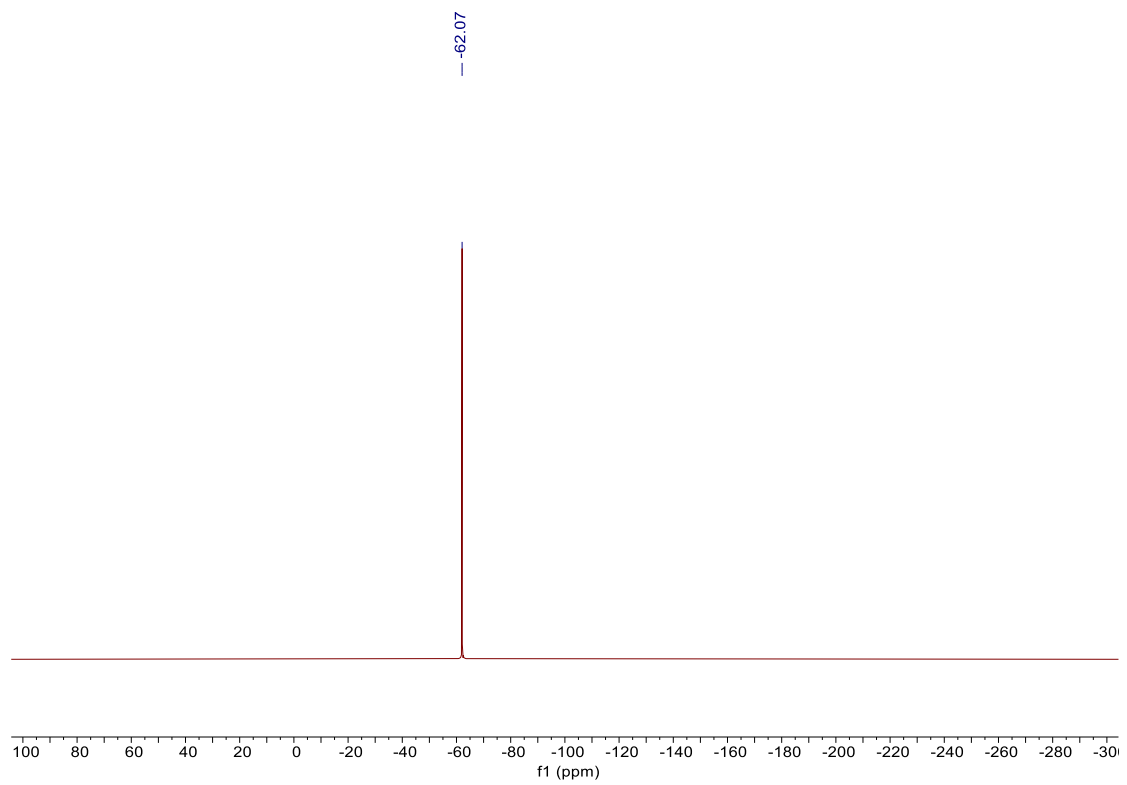

**<sup>1</sup>H NMR of compound 2r (400 MHz in CDCl<sub>3</sub>)**

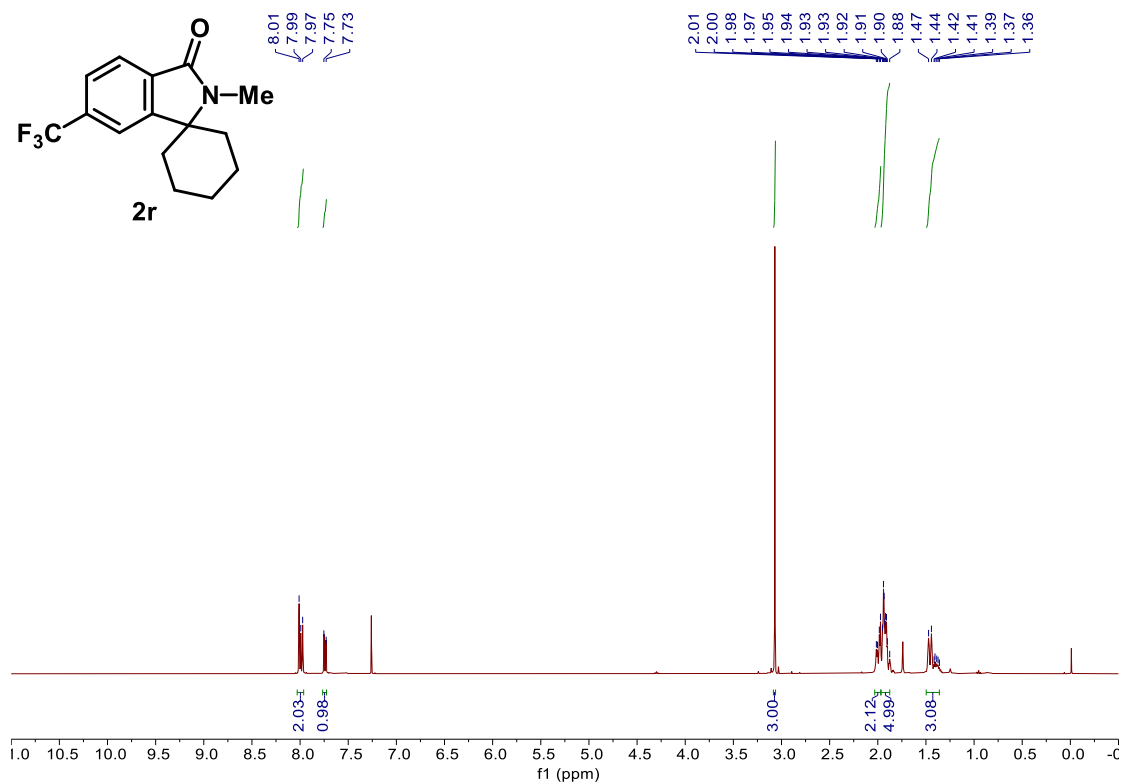

**<sup>13</sup>C NMR of compound 2r (126 MHz in CDCl<sub>3</sub>)**

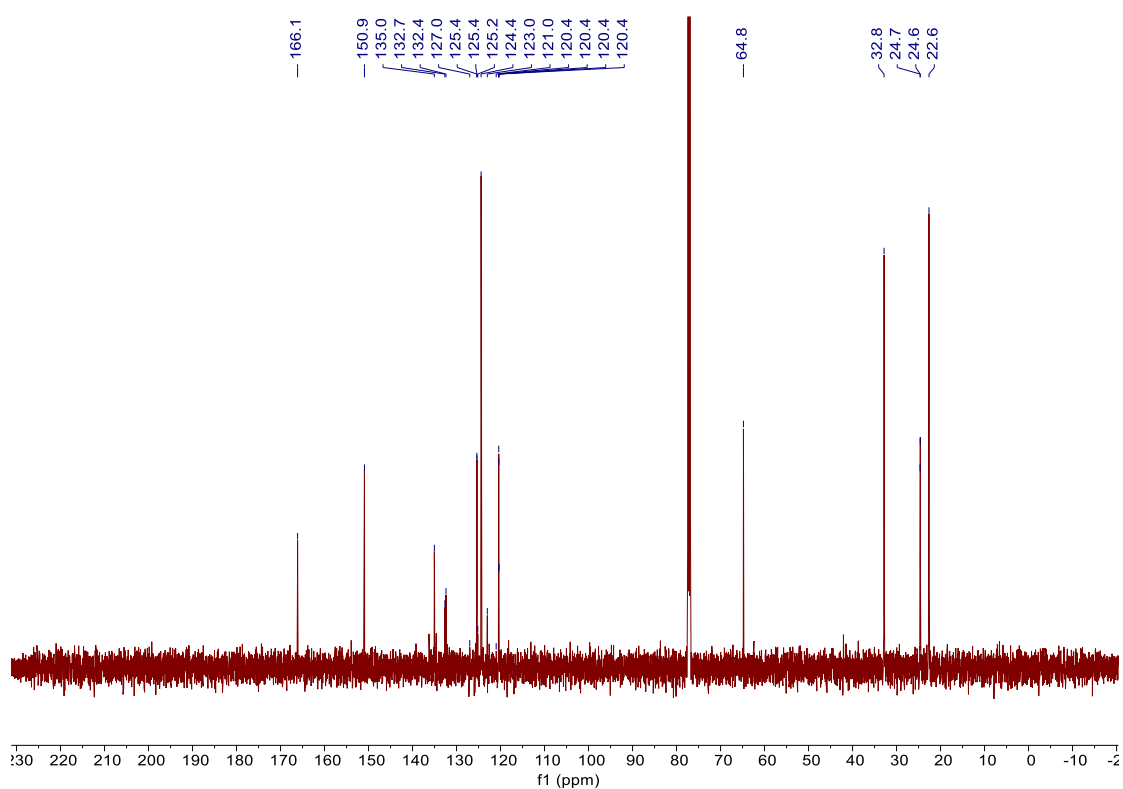

**<sup>19</sup>F NMR of compound 2r (471 MHz in CDCl<sub>3</sub>)**

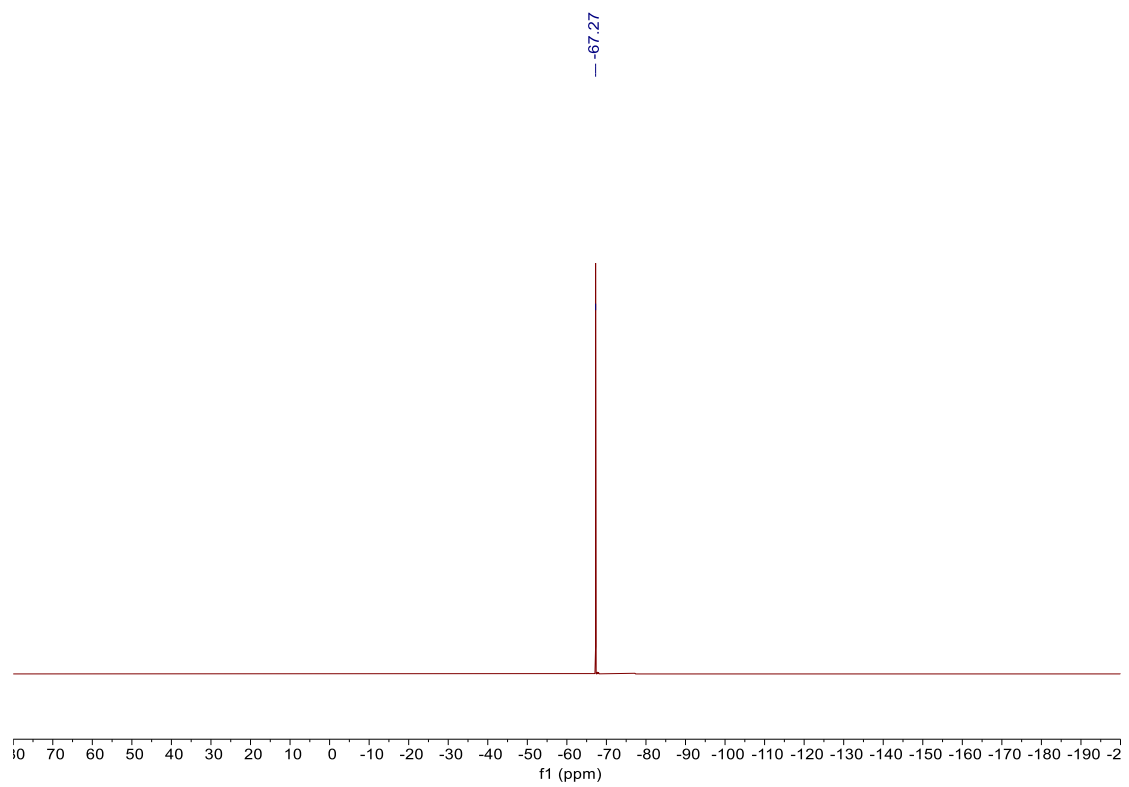

**<sup>1</sup>H NMR of compound 3a (500 MHz in CDCl<sub>3</sub>)**

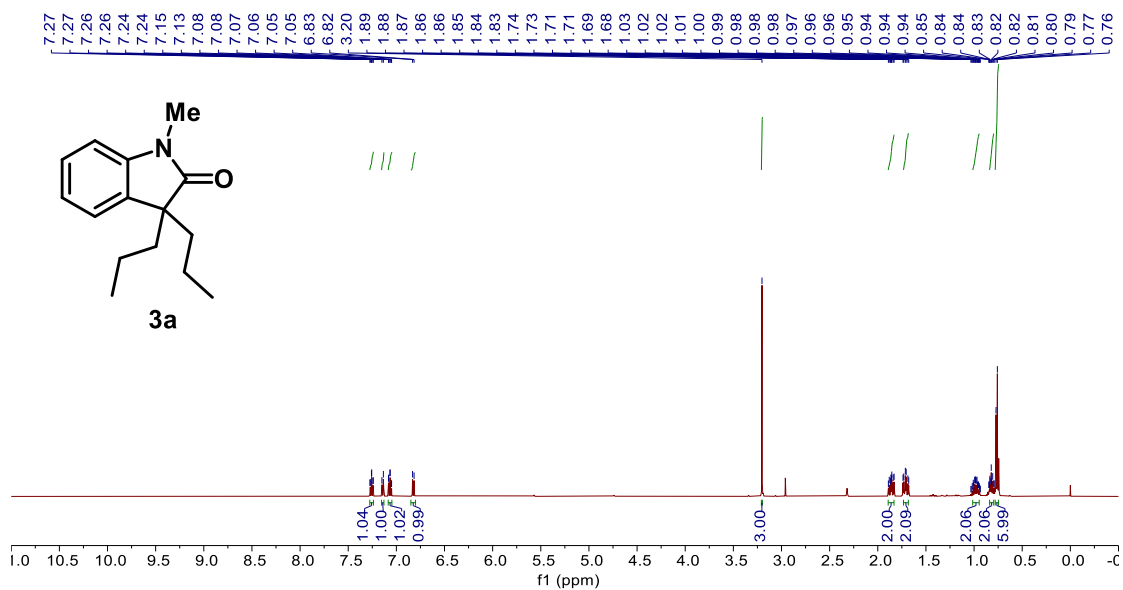

**<sup>13</sup>C NMR of compound 3a (126 MHz in CDCl<sub>3</sub>)**

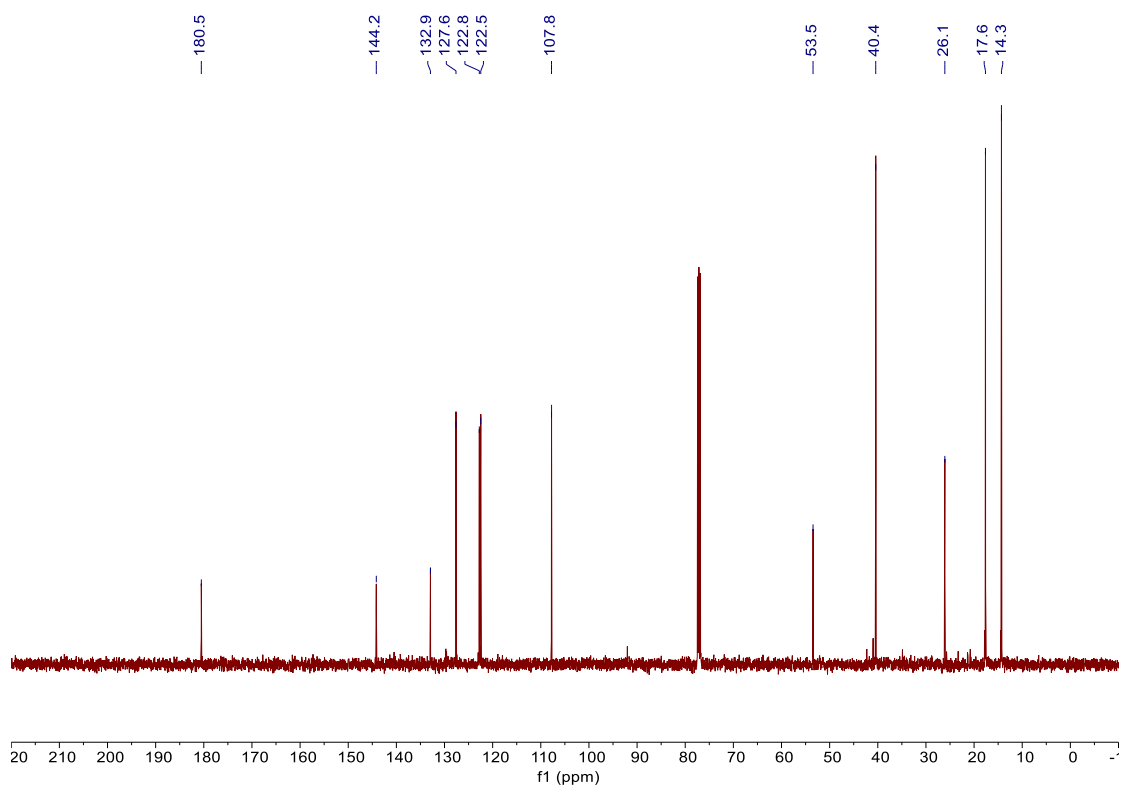



**<sup>1</sup>H NMR of compound 3b (500 MHz in CDCl<sub>3</sub>)**

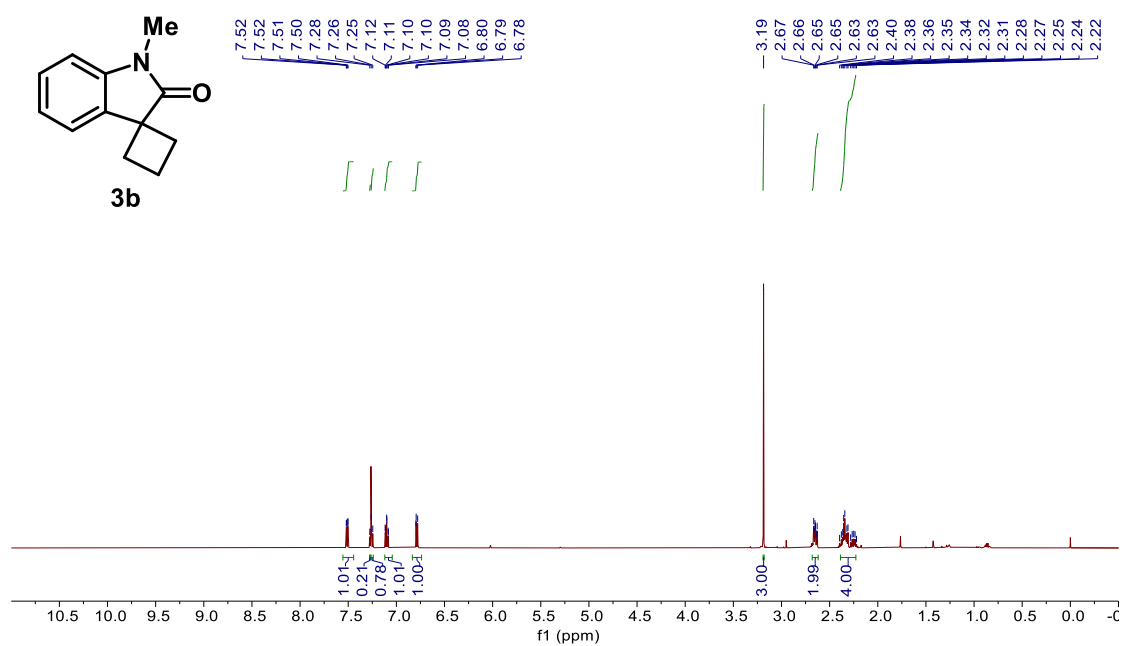

**<sup>13</sup>C NMR of compound 3b (126 MHz in CDCl<sub>3</sub>)**

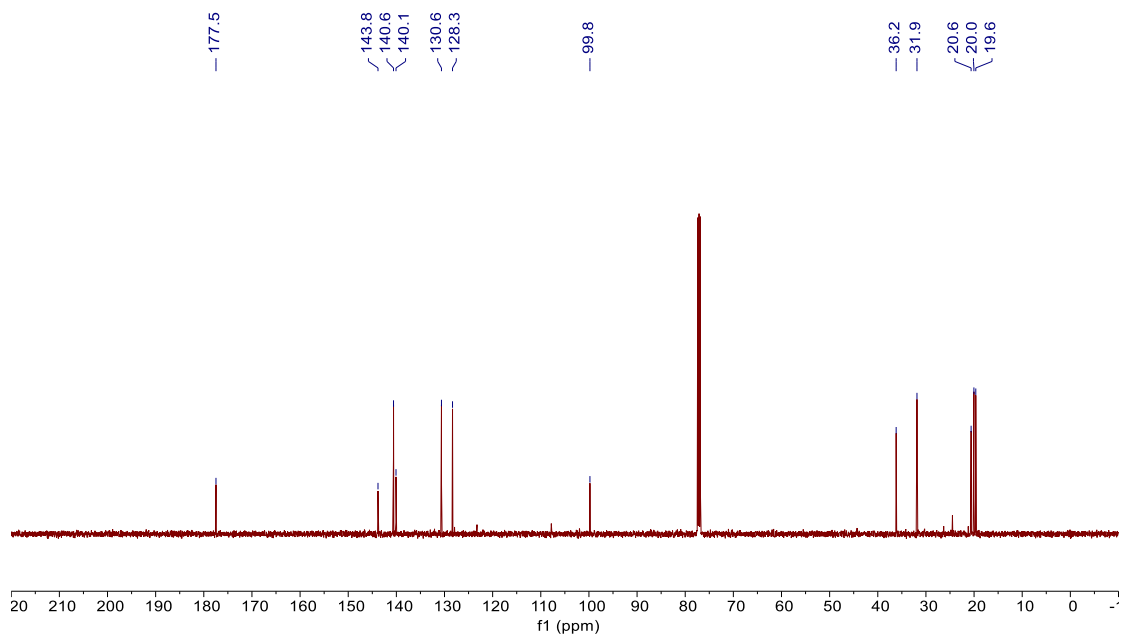

**<sup>1</sup>H NMR of compound 3c (500 MHz in CDCl<sub>3</sub>)**

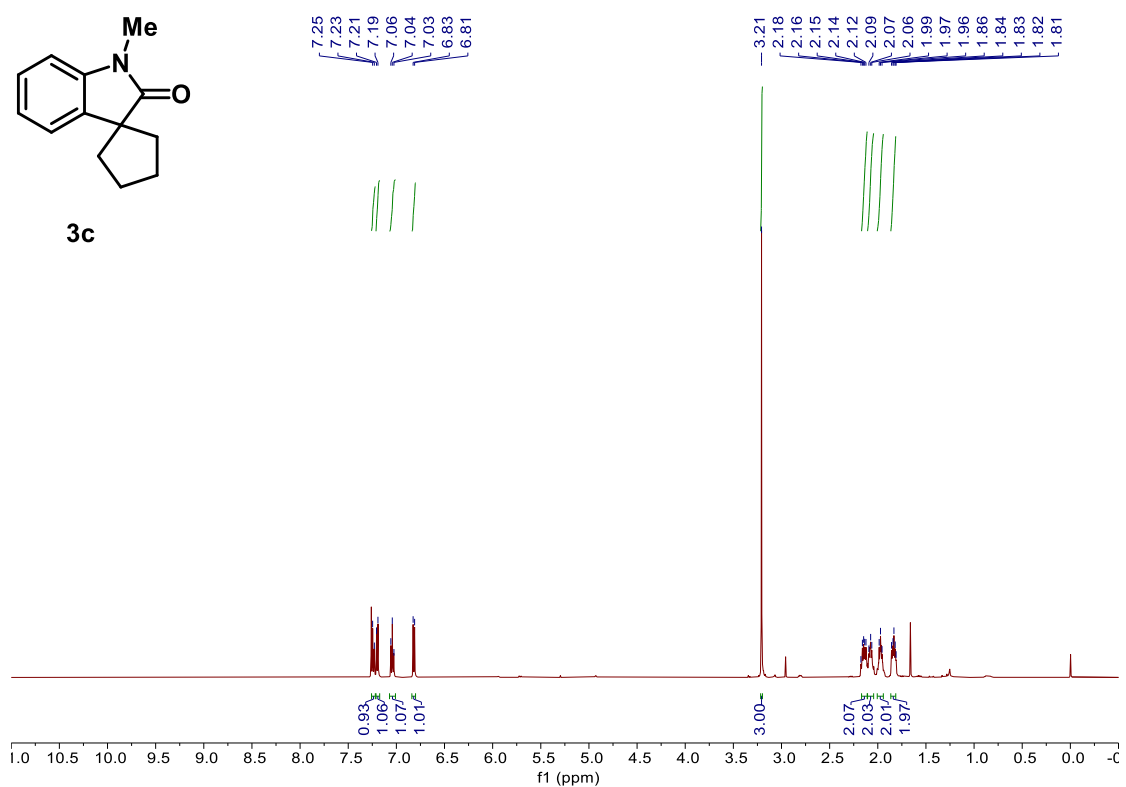

**<sup>13</sup>C NMR of compound 3c (126 MHz in CDCl<sub>3</sub>)**

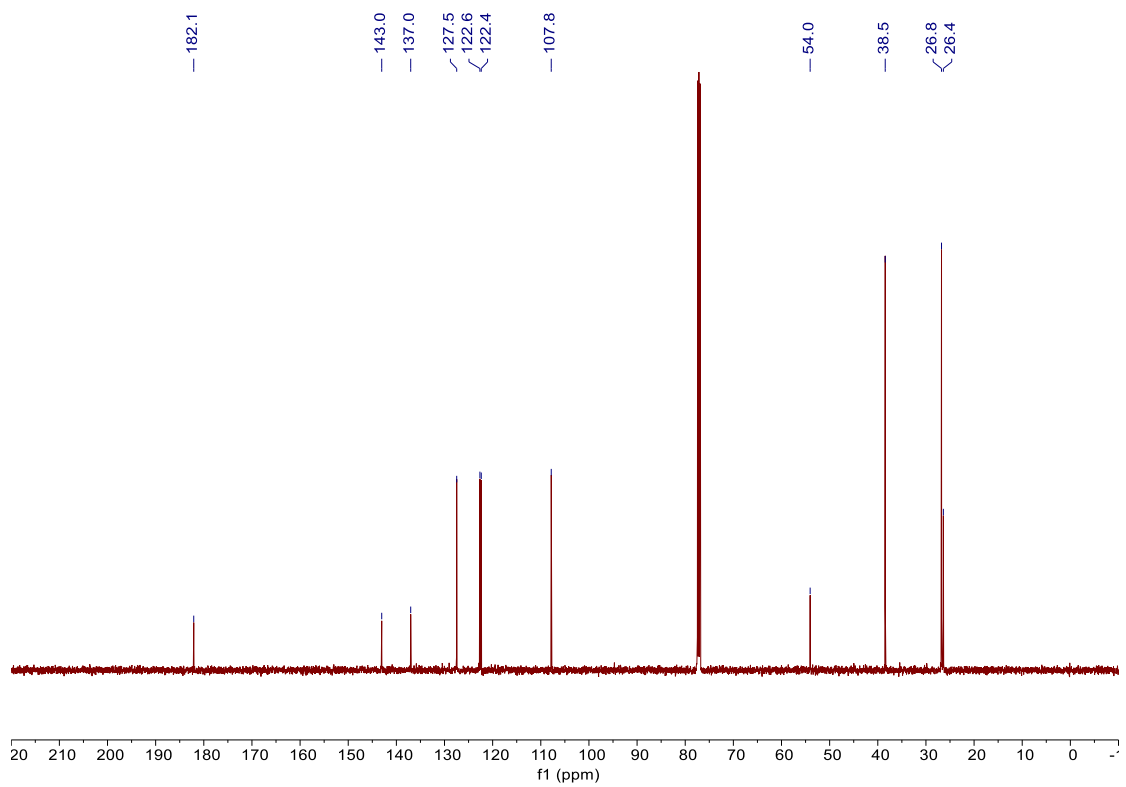

**<sup>1</sup>H NMR of compound 3d (500 MHz in CDCl<sub>3</sub>)**

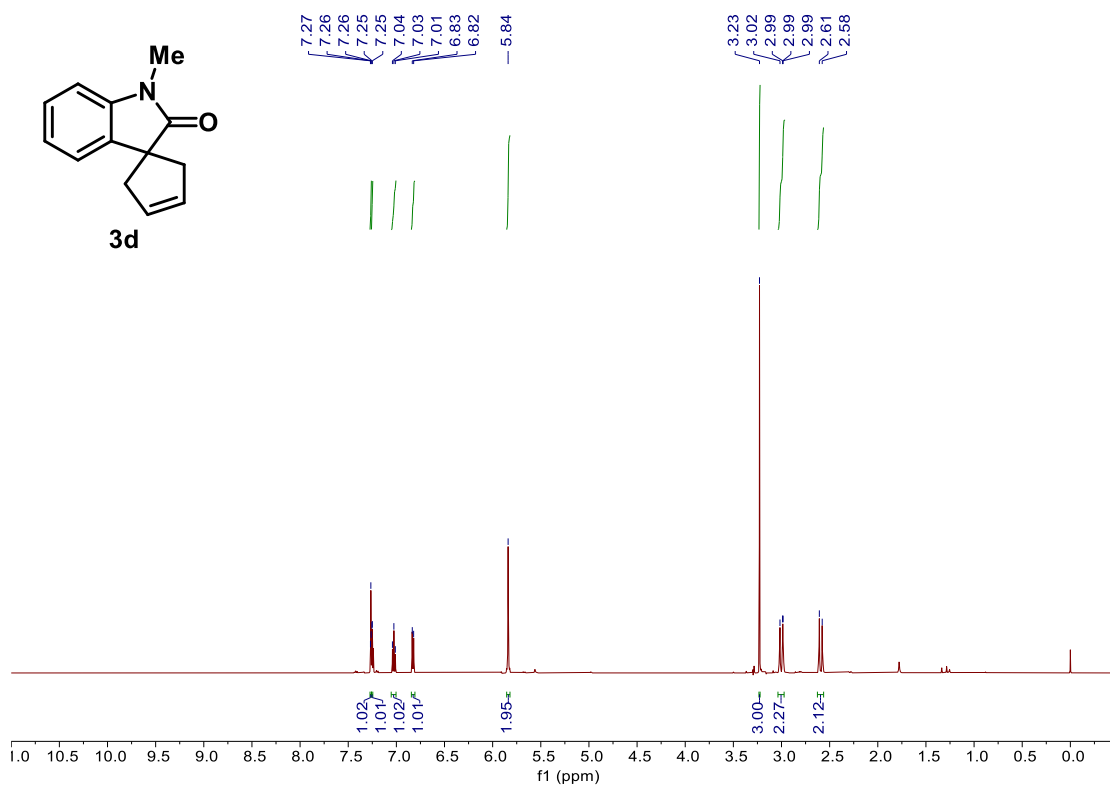

**<sup>13</sup>C NMR of compound 3d (126 MHz in CDCl<sub>3</sub>)**

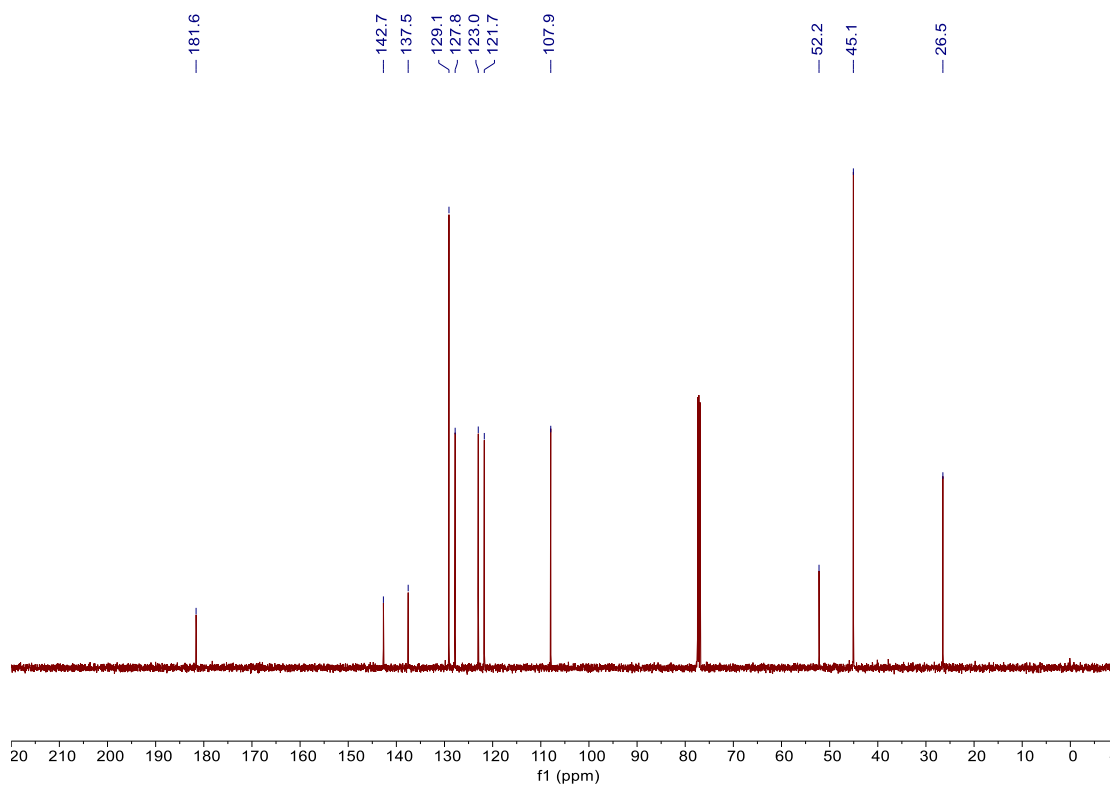

<sup>1</sup>H NMR of compound **3e** (500 MHz in CDCl<sub>3</sub>)

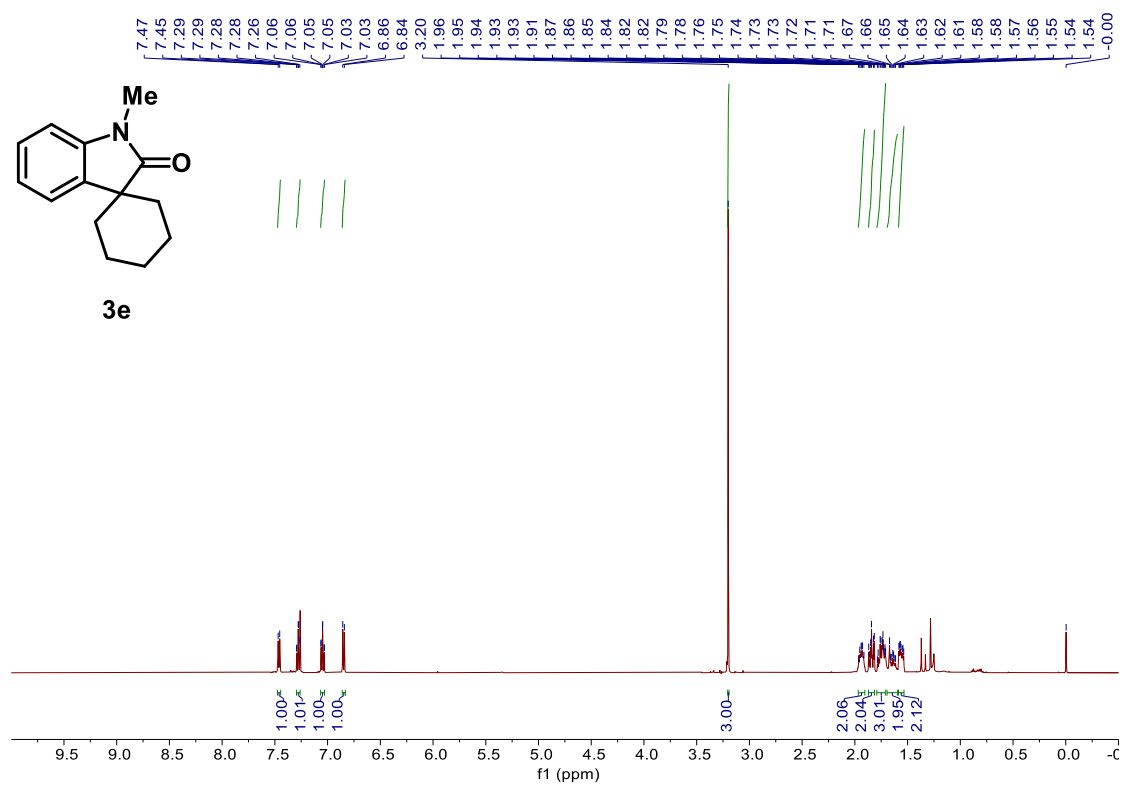

<sup>13</sup>C NMR of compound **3e** (126 MHz in CDCl<sub>3</sub>)

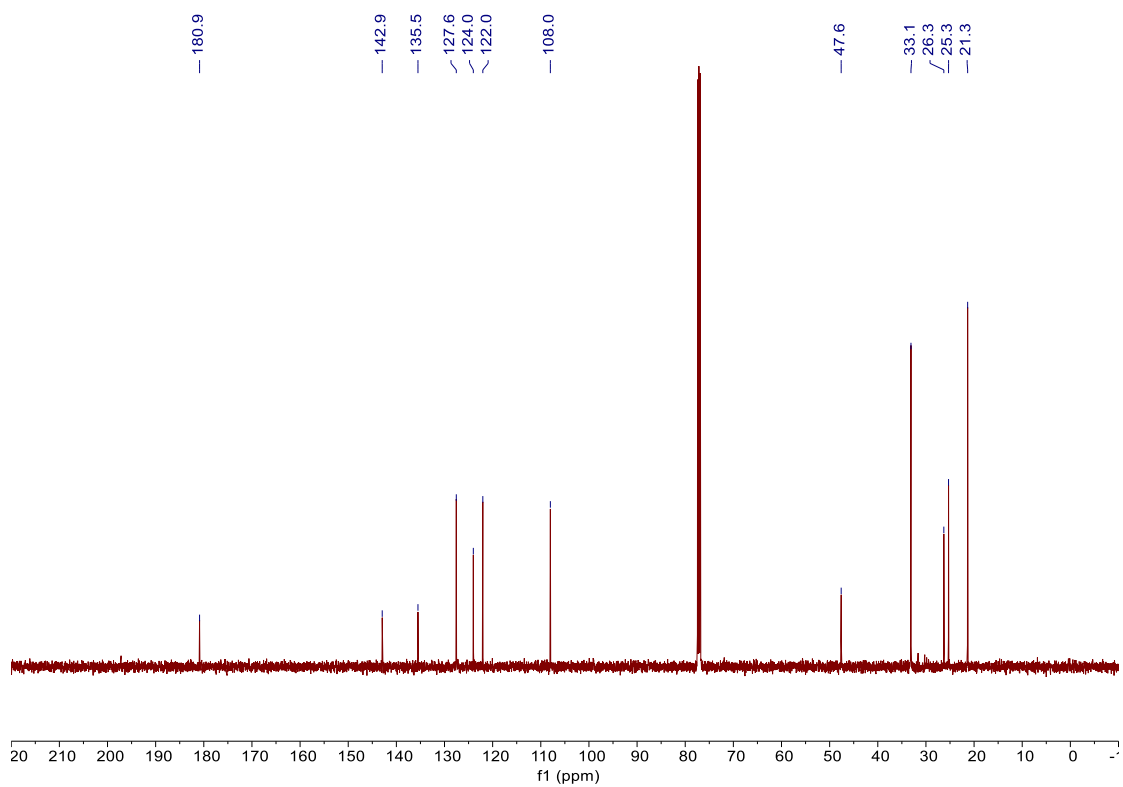

**<sup>1</sup>H NMR of compound 3f (500 MHz in CDCl<sub>3</sub>)**

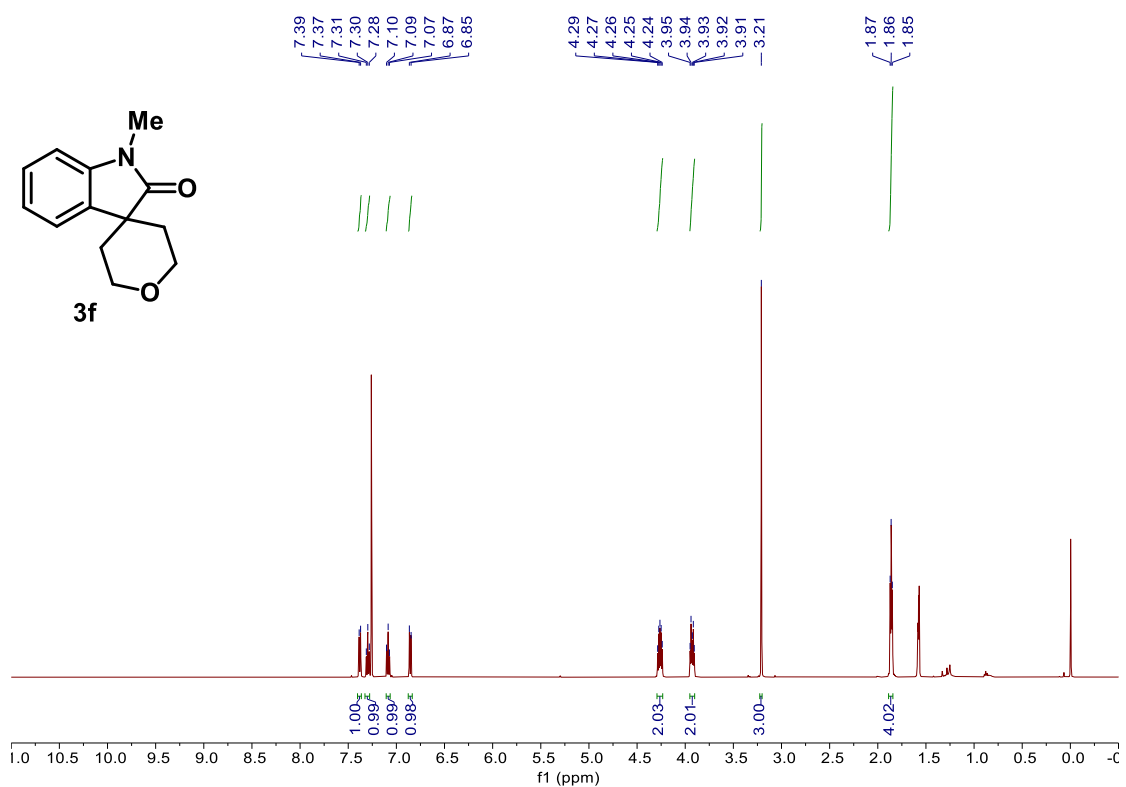

**<sup>13</sup>C NMR of compound 3f (126 MHz in CDCl<sub>3</sub>)**

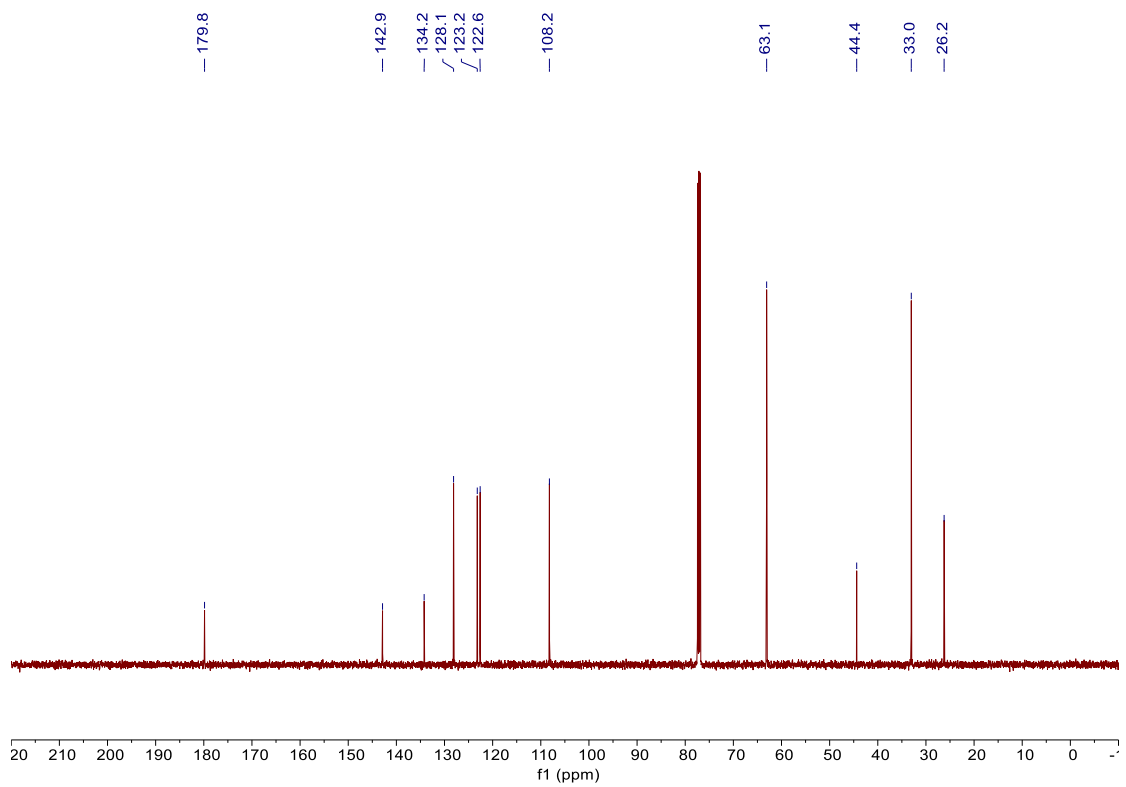

**<sup>1</sup>H NMR of compound 3g (500 MHz in CDCl<sub>3</sub>)**

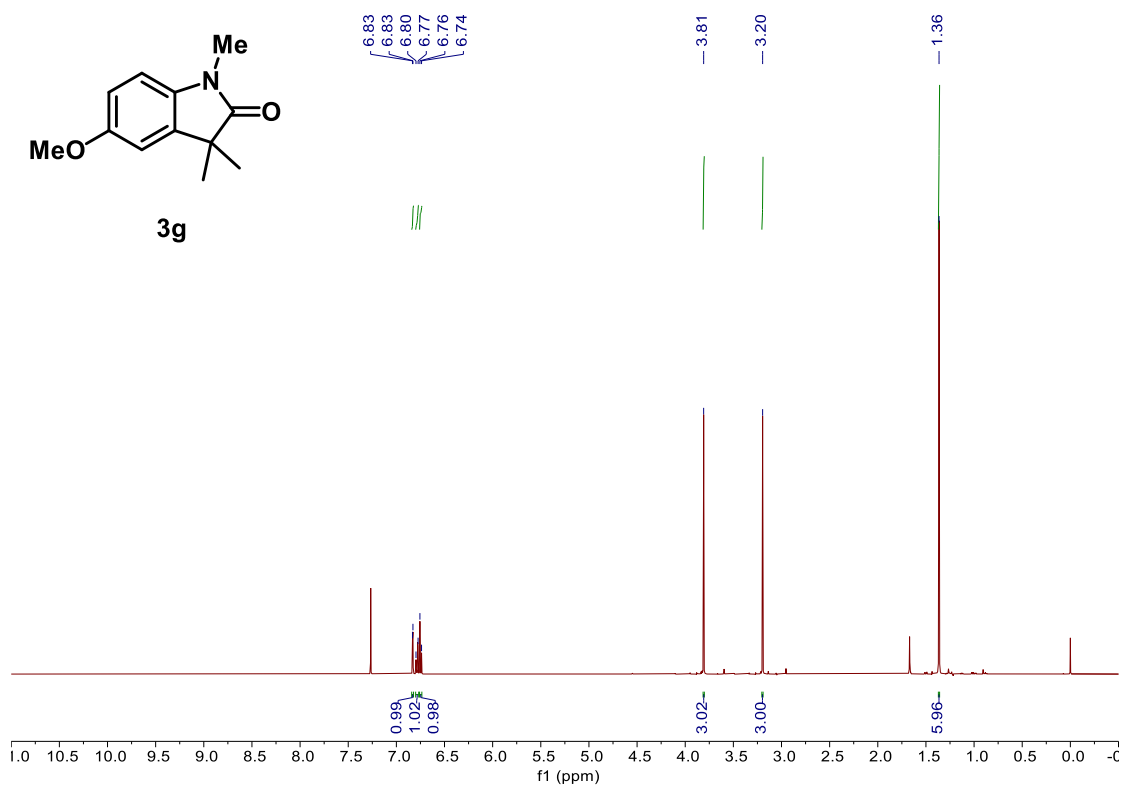

**<sup>13</sup>C NMR of compound 3g (126 MHz in CDCl<sub>3</sub>)**

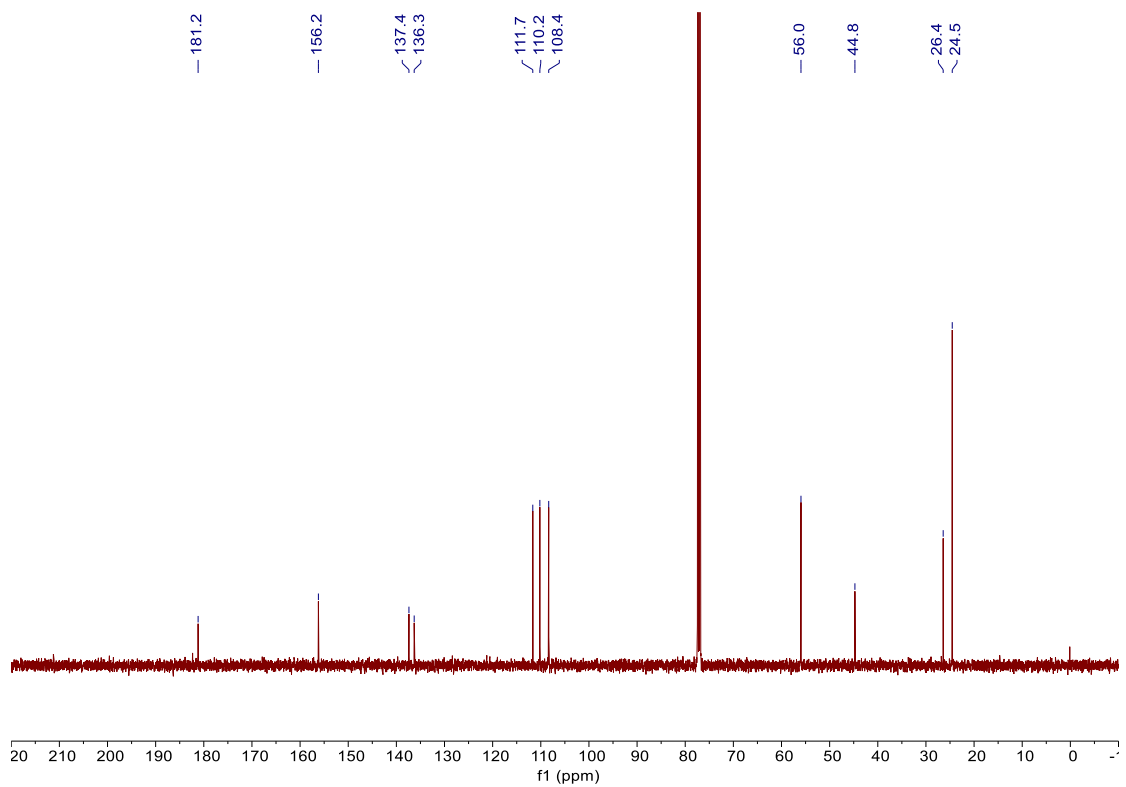

**<sup>1</sup>H NMR of compound 3h (500 MHz in CDCl<sub>3</sub>)**

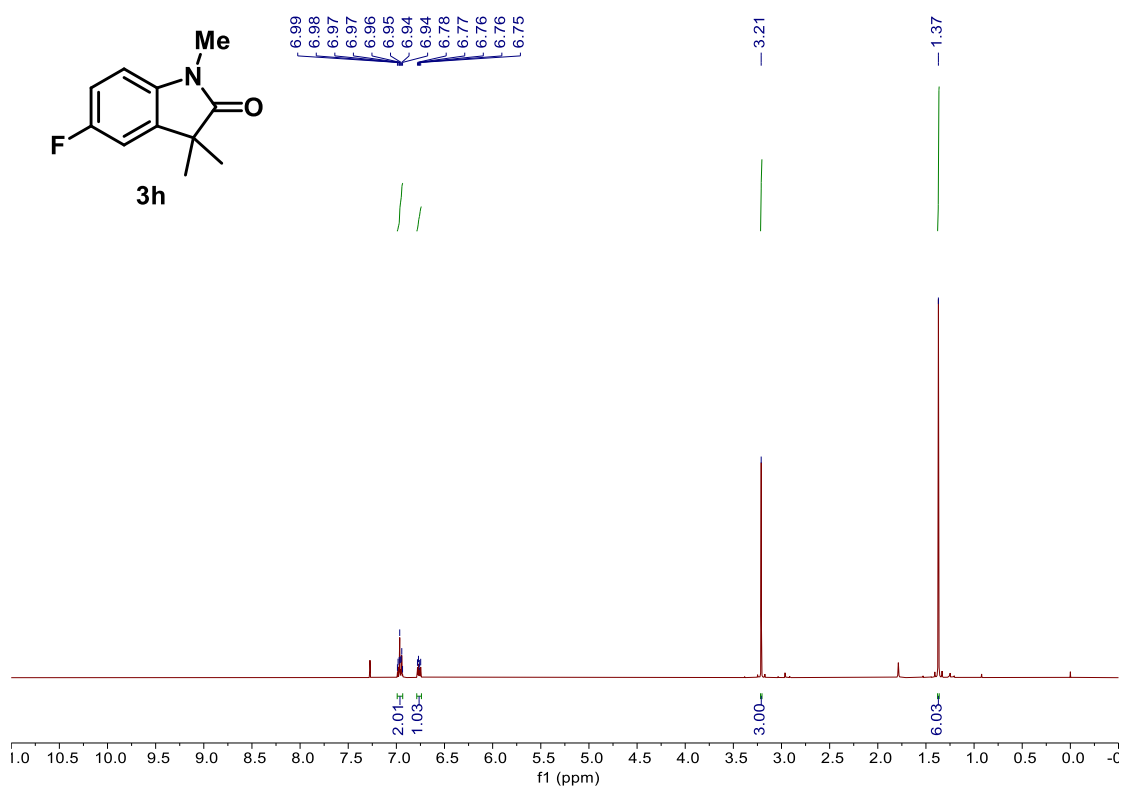

**<sup>13</sup>C NMR of compound 3h (101 MHz in CDCl<sub>3</sub>)**

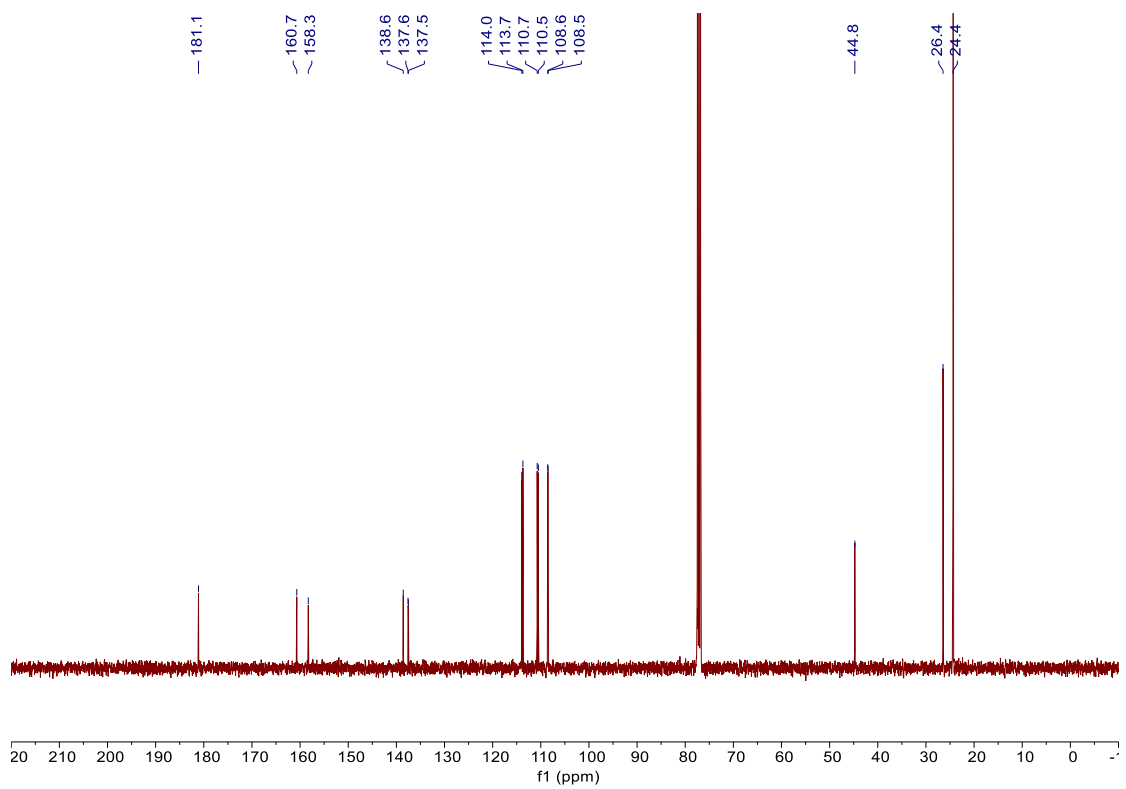

**$^{19}\text{F}$  NMR of compound **3h** (376 MHz in  $\text{CDCl}_3$ )**

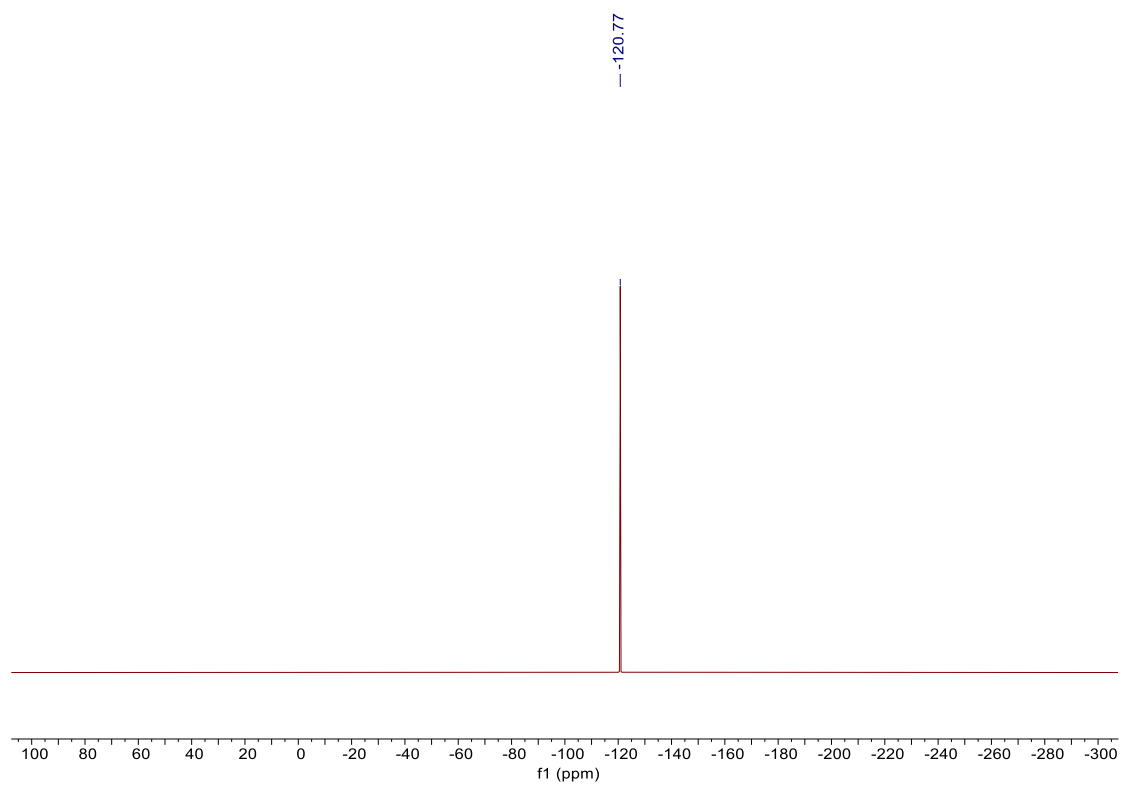



**<sup>1</sup>H NMR of compound 3i (500 MHz in CDCl<sub>3</sub>)**

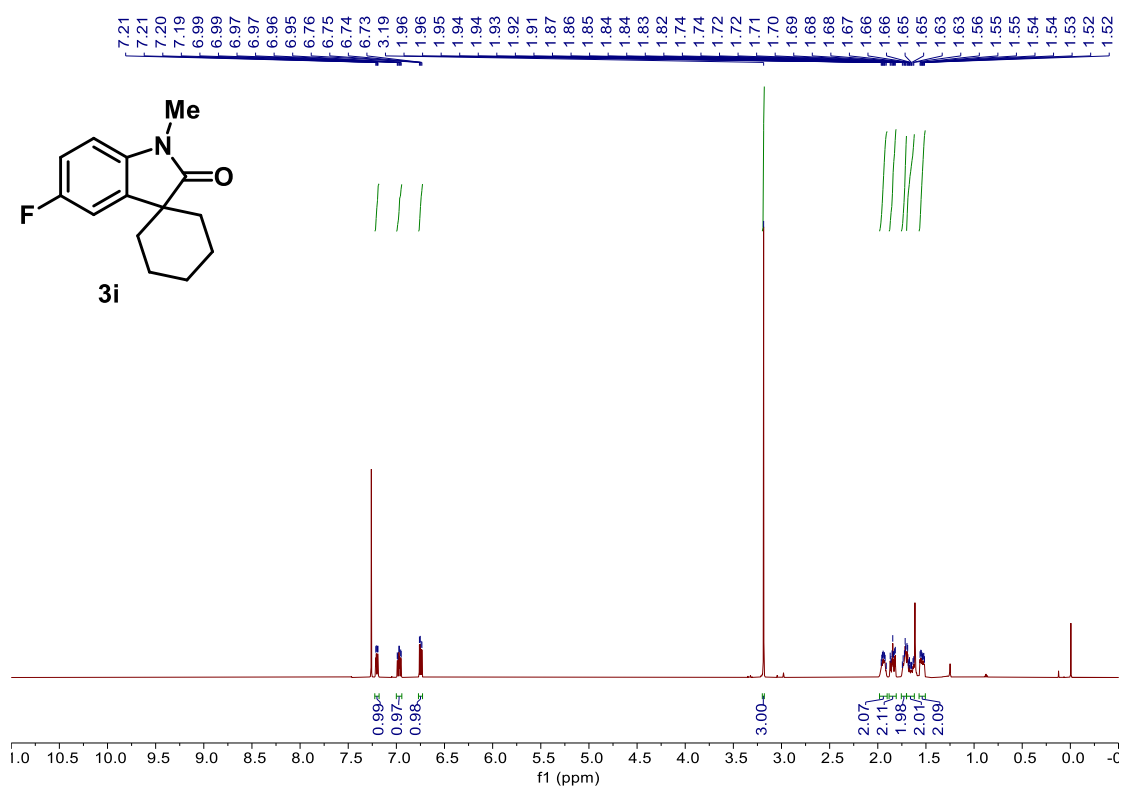

**<sup>13</sup>C NMR of compound 3i (126 MHz in CDCl<sub>3</sub>)**

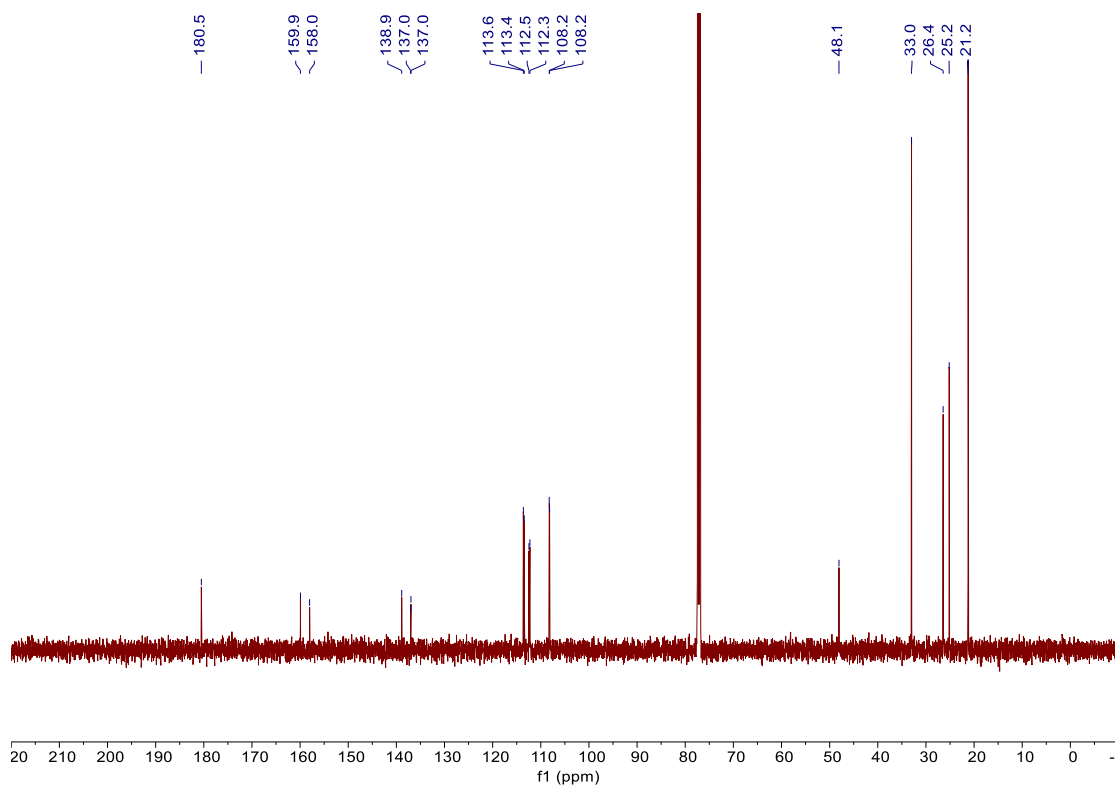

$^{19}\text{F}$  NMR of compound **3i** (471 MHz in  $\text{CDCl}_3$ )

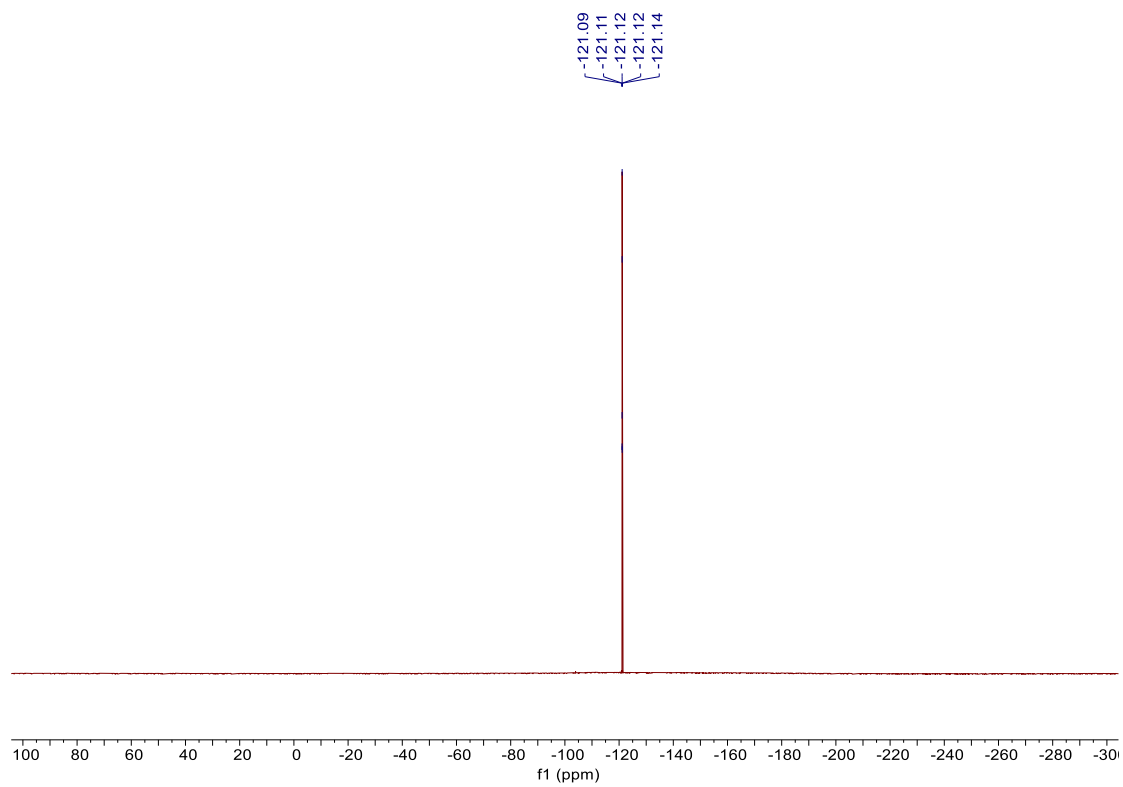

**<sup>1</sup>H NMR of compound 3j (500 MHz in CDCl<sub>3</sub>)**

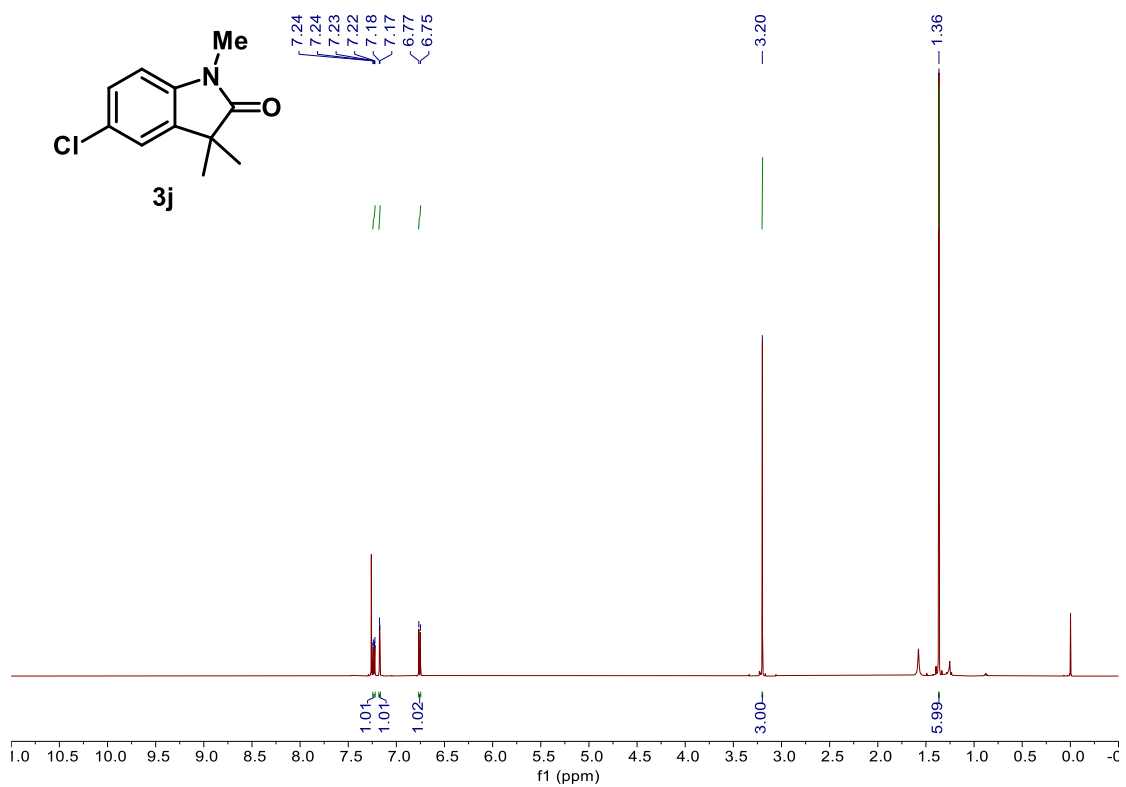

**<sup>13</sup>C NMR of compound 3j (126 MHz in CDCl<sub>3</sub>)**

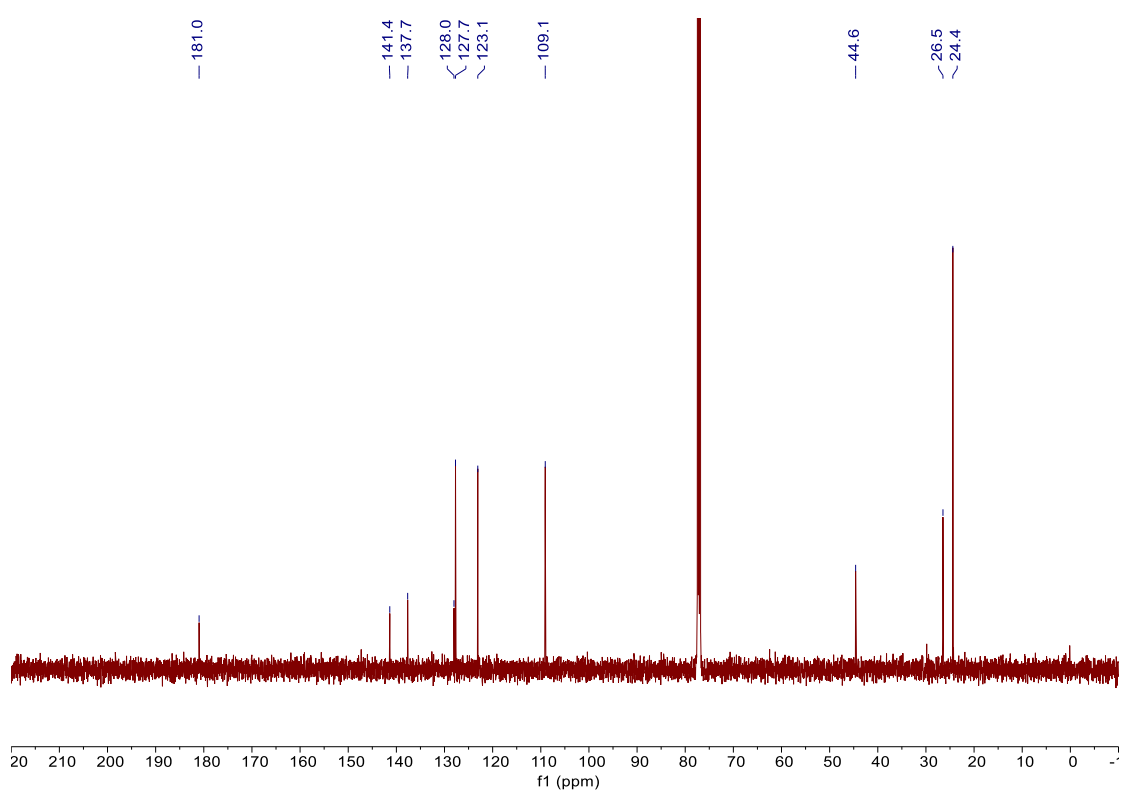

<sup>1</sup>H NMR of compound **3k** (500 MHz in CDCl<sub>3</sub>)

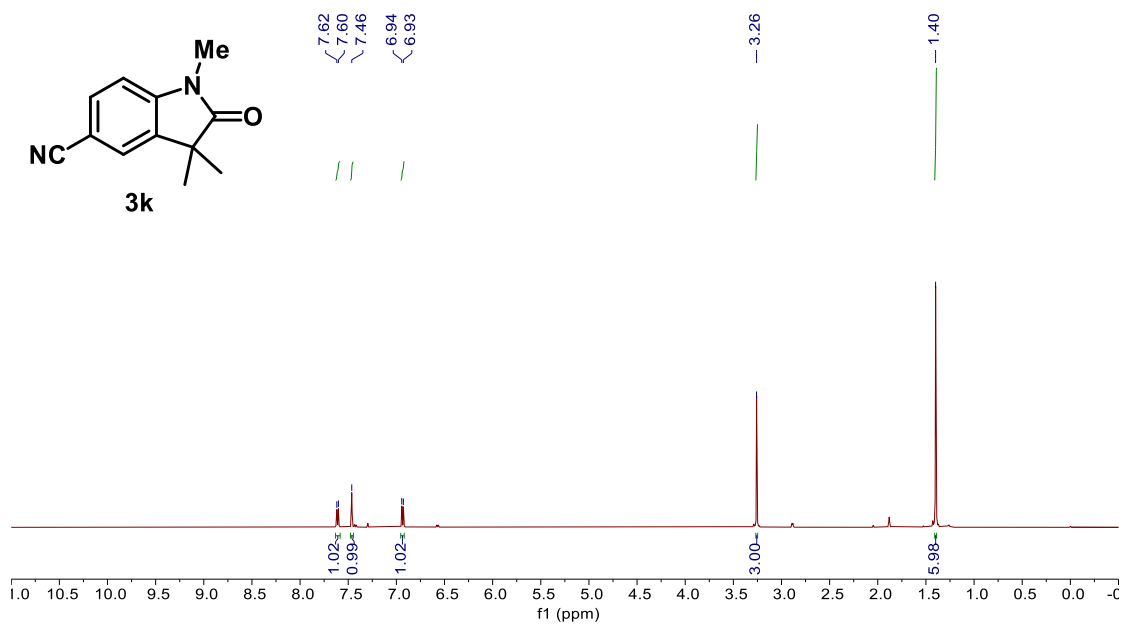

<sup>13</sup>C NMR of compound **3k** (126 MHz in CDCl<sub>3</sub>)

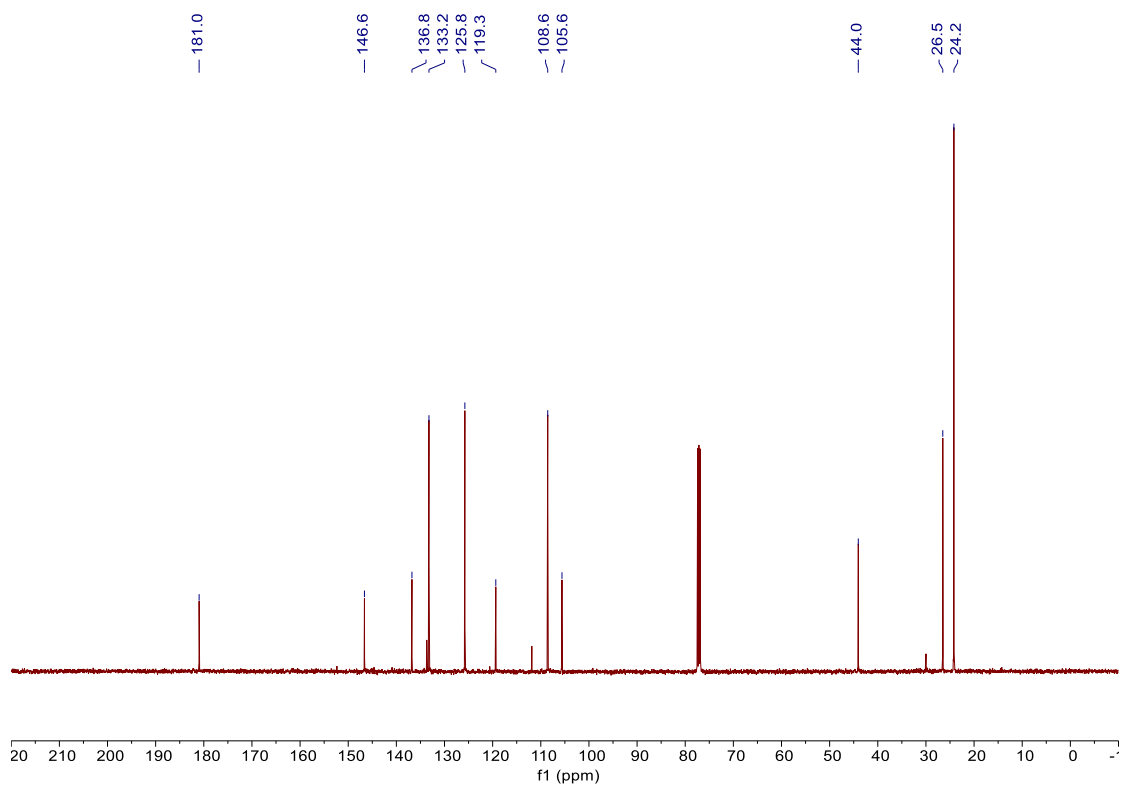

**<sup>1</sup>H NMR of compound 3I (500 MHz in CDCl<sub>3</sub>)**

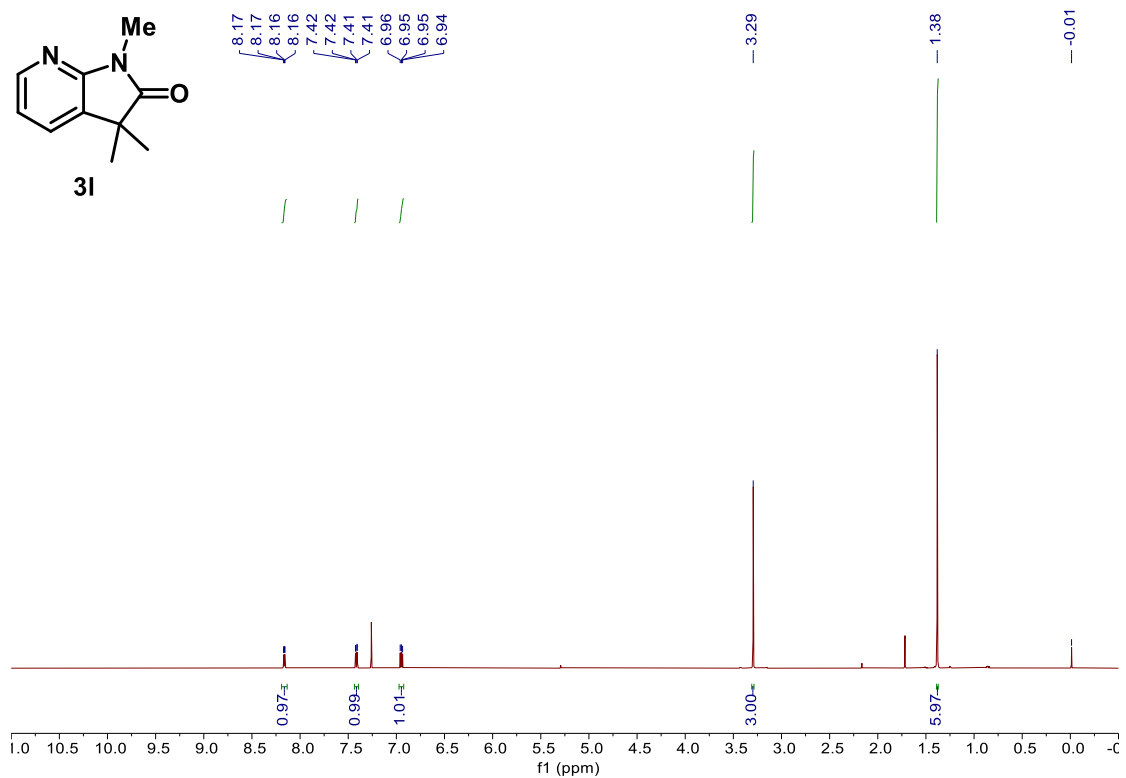

**<sup>13</sup>C NMR of compound 3I (126 MHz in CDCl<sub>3</sub>)**

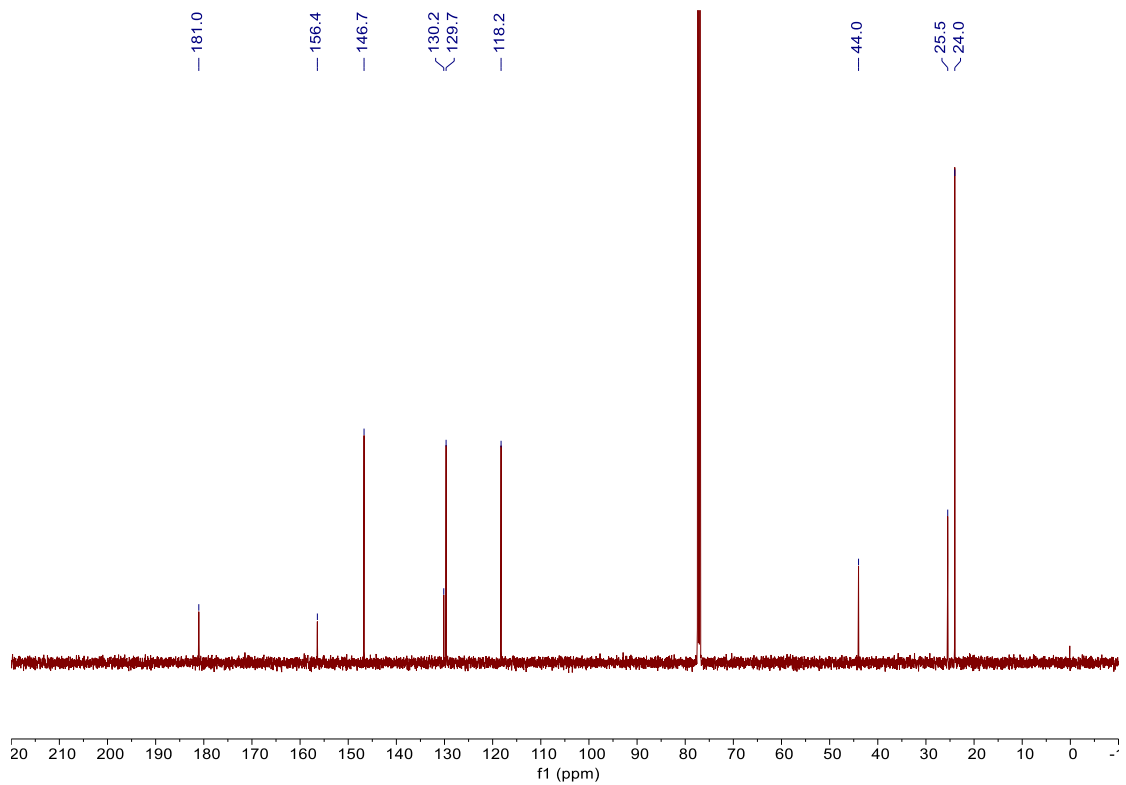

**<sup>1</sup>H NMR of compound 4a (500 MHz in CDCl<sub>3</sub>)**

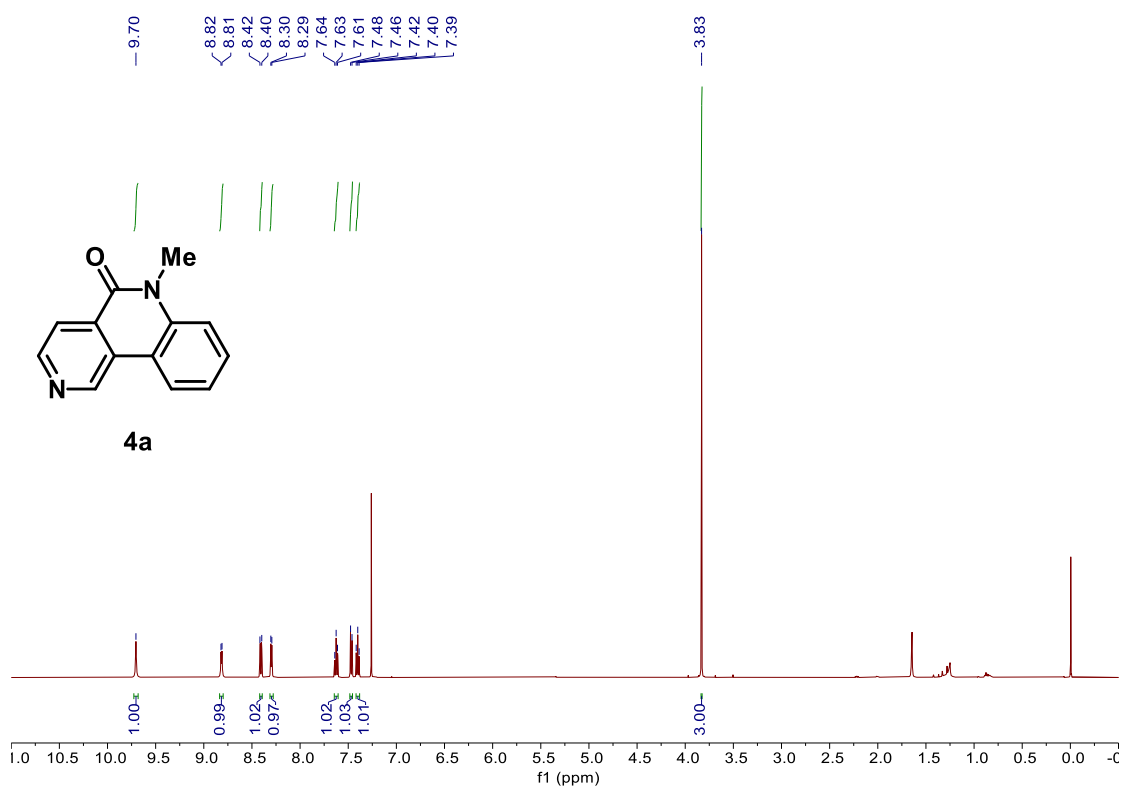

**<sup>13</sup>C NMR of compound 4a (126 MHz in CDCl<sub>3</sub>)**

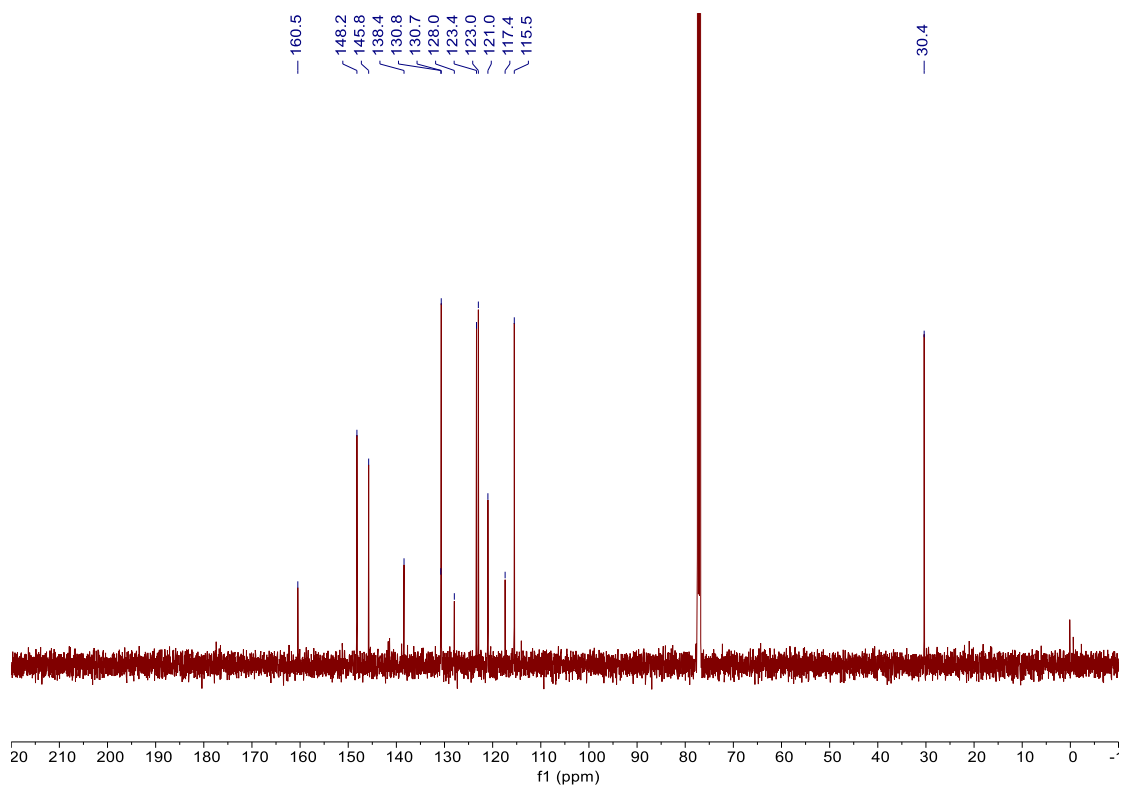

## 7. Computational details

All calculations were carried out by using Gaussian 16 program.<sup>11</sup> Geometries were optimized at B3LYP<sup>12</sup>-D<sup>13</sup>(BJ)3/BSI level in N,N-dimethylformamide (DMF) with SMD<sup>14</sup> solvation model, BSI denoting a basis set with SDD<sup>15</sup> for I atom and 6-31G(d,p) for other atoms. Harmonic vibrational frequencies were calculated at the same level to verify the optimized geometries to be minima (no imaginary frequency) or transition states (having unique one imaginary frequency), and obtain the thermal corrections. The energies were further refined by B3LYP-D3(BJ)/BSII single-point-energy calculations with SMD solvent model in DMF, BSII representing a basis set with SDD for I atom and 6-311++G(d,p) for other atoms. The selected calculated structures were illustrated using the CYLview.<sup>16</sup>

### Cartesian Coordinates in Å and Energies (in a.u.) at 298.15 K for the Optimized Structures

|                                     |          |          |           |   |           |           |           |
|-------------------------------------|----------|----------|-----------|---|-----------|-----------|-----------|
| <b>1</b>                            |          |          |           | H | 3.585748  | 0.934993  | 0.500316  |
| B3LYP-D3BJ/BSI SCF energy in DMF:   |          |          |           | H | -0.641260 | 2.966212  | -1.106545 |
| -647.7272379 a.u.                   |          |          |           | H | 1.307257  | 4.412325  | -0.607652 |
| B3LYP-D3BJ/BSII SCF energy in DMF:  |          |          |           | H | 3.427443  | 3.390910  | 0.219672  |
| -647.88922 a.u.                     |          |          |           | C | -0.821491 | 0.286218  | -1.003059 |
| B3LYP-D3BJ/BSII enthalpy in DMF:    |          |          |           | O | -0.770936 | -0.168446 | -2.152884 |
| -647.5812471 a.u.                   |          |          |           | N | -1.861972 | 0.067487  | -0.153965 |
| B3LYP-D3BJ/BSII free energy in DMF: |          |          |           | C | -2.019813 | 0.598350  | 1.226345  |
| -647.6461051 a.u.                   |          |          |           | H | -2.935004 | 0.118982  | 1.575075  |
|                                     |          |          |           | C | -2.954016 | -0.806253 | -0.650230 |
| C                                   | 2.661160 | 1.384221 | 0.156502  | H | -2.663438 | -1.052903 | -1.670612 |
| C                                   | 1.555945 | 0.586684 | -0.135286 | C | -4.293494 | -0.067799 | -0.700630 |
| C                                   | 0.343457 | 1.137987 | -0.559836 | H | -4.213207 | 0.843201  | -1.301851 |
| C                                   | 0.281746 | 2.527246 | -0.742098 | H | -5.048637 | -0.713955 | -1.160234 |
| C                                   | 1.379937 | 3.338863 | -0.464254 | H | -4.657016 | 0.205880  | 0.295220  |
| C                                   | 2.567234 | 2.767960 | -0.005373 |   |           |           |           |

|   |           |           |           |   |           |           |           |
|---|-----------|-----------|-----------|---|-----------|-----------|-----------|
| C | -3.026225 | -2.106809 | 0.154353  | H | 1.319805  | 0.920602  | -1.705330 |
| H | -3.322055 | -1.935706 | 1.194709  | H | 1.486596  | 1.506621  | 1.289118  |
| H | -3.768361 | -2.776116 | -0.293179 | H | 3.340780  | -0.094575 | -0.554034 |
| H | -2.058127 | -2.617480 | 0.150302  | H | 1.352919  | -1.324411 | -1.505388 |
| C | -2.279518 | 2.108064  | 1.280656  | H | 0.605730  | 2.351119  | -0.988399 |
| H | -1.366214 | 2.687519  | 1.135400  | H | 2.666129  | 2.142350  | 0.144084  |
| H | -3.008234 | 2.409927  | 0.523184  | H | 3.519155  | 0.075613  | 1.186811  |
| H | -2.684436 | 2.365728  | 2.265096  | H | 0.621072  | -2.588093 | -0.520720 |
| C | -0.921019 | 0.165355  | 2.199730  | H | 2.623737  | -2.120242 | 0.623384  |
| H | -0.759099 | -0.914067 | 2.152938  | H | 1.428239  | -1.230608 | 1.553118  |
| H | 0.028571  | 0.667368  | 2.007566  | C | -2.479863 | 0.620393  | 0.759522  |
| H | -1.233835 | 0.420969  | 3.217694  | C | -1.468407 | 1.433488  | -0.036619 |
| I | 1.780524  | -1.548286 | 0.087977  | C | -2.708543 | -0.715131 | 0.051769  |

#### DBU

B3LYP-D3BJ/BSI SCF energy in DMF:

-462.1714993 a.u.

B3LYP-D3BJ/BSII SCF energy in DMF:

-462.2836715 a.u.

B3LYP-D3BJ/BSII enthalpy in DMF:

-462.0236666 a.u.

B3LYP-D3BJ/BSII free energy in DMF:

-462.0694716 a.u.

|   |           |           |           |
|---|-----------|-----------|-----------|
| C | 0.903490  | 1.321609  | -0.773929 |
| C | 1.974070  | 1.310532  | 0.325131  |
| C | -0.393274 | -0.766322 | -0.361455 |
| C | 2.775592  | 0.006441  | 0.383274  |
| C | 0.902898  | -1.533214 | -0.526234 |
| C | 1.940905  | -1.263552 | 0.582908  |

|   |           |           |           |
|---|-----------|-----------|-----------|
| H | -1.938978 | 1.856509  | -0.935649 |
| H | -1.098193 | 2.274502  | 0.560602  |
| H | -2.089221 | 0.429843  | 1.766363  |
| H | -3.410521 | 1.186817  | 0.864725  |
| H | -3.187832 | -0.531906 | -0.923482 |
| H | -3.405760 | -1.338352 | 0.624793  |
| N | -1.465734 | -1.460577 | -0.135804 |
| N | -0.322103 | 0.603255  | -0.422224 |

#### Complex1

B3LYP-D3BJ/BSI SCF energy in DMF:

-1109.913708 a.u.

B3LYP-D3BJ/BSII SCF energy in DMF:

-1110.183638 a.u.

B3LYP-D3BJ/BSII enthalpy in DMF:

-1109.6163800 a.u.

B3LYP-D3BJ/BSII free energy in DMF:



|                    |           |           |           |   |           |           |           |
|--------------------|-----------|-----------|-----------|---|-----------|-----------|-----------|
| -1109.7090990 a.u. |           |           |           | H | -5.718505 | 1.494738  | -1.087565 |
|                    |           |           |           | C | -3.125835 | 0.763767  | -1.922360 |
| C                  | -2.233499 | -3.107785 | -0.381971 | H | -2.103845 | 1.047336  | -2.184250 |
| C                  | -1.879057 | -1.799746 | -0.049432 | H | -3.162415 | -0.319345 | -1.793572 |
| C                  | -2.726676 | -1.002712 | 0.730032  | H | -3.779756 | 1.024566  | -2.761403 |
| C                  | -3.913898 | -1.565200 | 1.218884  | I | 0.027794  | -1.043057 | -0.736033 |
| C                  | -4.272828 | -2.872861 | 0.895765  | C | 5.496281  | 0.550452  | 0.629093  |
| C                  | -3.436112 | -3.641772 | 0.085905  | C | 5.192082  | -0.197767 | 1.933011  |
| H                  | -1.573517 | -3.709976 | -0.997361 | C | 3.558885  | 0.015012  | -0.835377 |
| H                  | -4.557987 | -0.965971 | 1.854661  | C | 4.876769  | -1.682177 | 1.723956  |
| H                  | -5.200375 | -3.288346 | 1.277242  | C | 3.904486  | -1.448608 | -0.663927 |
| H                  | -3.708207 | -4.660124 | -0.175256 | C | 3.708477  | -1.970845 | 0.774896  |
| C                  | -2.303806 | 0.370393  | 1.194267  | H | 6.168563  | -0.045081 | 0.001655  |
| O                  | -1.618939 | 0.427244  | 2.223876  | H | 4.357735  | 0.306004  | 2.438246  |
| N                  | -2.658059 | 1.468469  | 0.471055  | H | 5.775932  | -2.175405 | 1.328576  |
| C                  | -3.602484 | 1.514078  | -0.676090 | H | 4.936716  | -1.637891 | -0.984708 |
| H                  | -3.618052 | 2.570284  | -0.946899 | H | 6.022717  | 1.482619  | 0.848946  |
| C                  | -2.089624 | 2.766807  | 0.907796  | H | 6.063013  | -0.110352 | 2.594163  |
| H                  | -1.422532 | 2.508970  | 1.729595  | H | 4.670549  | -2.146918 | 2.695832  |
| C                  | -3.169853 | 3.706959  | 1.447587  | H | 3.251667  | -1.992968 | -1.348491 |
| H                  | -3.721298 | 3.234446  | 2.266493  | H | 3.566001  | -3.056509 | 0.723052  |
| H                  | -2.705324 | 4.621357  | 1.831510  | H | 2.778198  | -1.556068 | 1.182072  |
| H                  | -3.885736 | 4.000696  | 0.672665  | C | 2.411023  | 2.473919  | -0.417328 |
| C                  | -1.254320 | 3.404443  | -0.206154 | C | 3.865921  | 2.318120  | 0.001228  |
| H                  | -1.868019 | 3.742564  | -1.047743 | C | 2.195121  | 1.719075  | -1.727847 |
| H                  | -0.726890 | 4.279551  | 0.187398  | H | 4.513134  | 2.964955  | -0.606875 |
| H                  | -0.511422 | 2.696808  | -0.583593 | H | 3.999323  | 2.615262  | 1.047346  |
| C                  | -5.042751 | 1.151533  | -0.296976 | H | 1.753386  | 2.050914  | 0.351025  |
| H                  | -5.180678 | 0.074641  | -0.186957 | H | 2.166191  | 3.535582  | -0.517562 |
| H                  | -5.336714 | 1.637988  | 0.637588  | H | 2.799747  | 2.184850  | -2.521725 |

|   |          |          |           |
|---|----------|----------|-----------|
| H | 1.149589 | 1.786957 | -2.046933 |
| N | 2.545983 | 0.305626 | -1.600171 |
| N | 4.303137 | 0.922680 | -0.134913 |

**Complex2**

B3LYP-D3BJ/BSI SCF energy in DMF:

-1109.91074 a.u.

B3LYP-D3BJ/BSII SCF energy in DMF:

-1110.182994 a.u.

B3LYP-D3BJ/BSII enthalpy in DMF:

-1109.6157918 a.u.

B3LYP-D3BJ/BSII free energy in DMF:

-1109.7086908 a.u.

|   |           |           |           |
|---|-----------|-----------|-----------|
| C | -2.001906 | 3.253906  | 0.021868  |
| C | -1.782593 | 1.897757  | -0.215474 |
| C | -2.832026 | 1.037795  | -0.557501 |
| C | -4.112979 | 1.586023  | -0.712352 |
| C | -4.345576 | 2.941551  | -0.485839 |
| C | -3.291253 | 3.774024  | -0.109210 |
| H | -1.177218 | 3.899822  | 0.301999  |
| H | -4.928683 | 0.936512  | -1.013117 |
| H | -5.346478 | 3.344382  | -0.604948 |
| H | -3.462514 | 4.830336  | 0.074497  |
| C | -2.587596 | -0.402828 | -0.937400 |
| O | -2.218986 | -0.616772 | -2.099700 |
| N | -2.772538 | -1.387750 | -0.016927 |
| C | -3.276234 | -1.231444 | 1.373406  |
| H | -3.217734 | -2.243198 | 1.775807  |
| C | -2.435774 | -2.768779 | -0.441981 |

|   |           |           |           |
|---|-----------|-----------|-----------|
| H | -2.113491 | -2.664293 | -1.477171 |
| C | -3.659173 | -3.687356 | -0.413136 |
| H | -4.466669 | -3.278948 | -1.028812 |
| H | -3.388089 | -4.669633 | -0.814023 |
| H | -4.041224 | -3.840023 | 0.601578  |
| C | -1.260977 | -3.320166 | 0.370758  |
| H | -1.522373 | -3.486979 | 1.421115  |
| H | -0.944062 | -4.281517 | -0.046713 |
| H | -0.412802 | -2.631979 | 0.331499  |
| C | -4.752424 | -0.826162 | 1.448917  |
| H | -4.897765 | 0.236091  | 1.245354  |
| H | -5.355019 | -1.402304 | 0.741064  |
| H | -5.127419 | -1.026196 | 2.458273  |
| C | -2.392264 | -0.367430 | 2.276110  |
| H | -1.346753 | -0.677868 | 2.214943  |
| H | -2.453559 | 0.693511  | 2.027854  |
| H | -2.725680 | -0.488205 | 3.312298  |
| I | 0.228470  | 1.146213  | -0.045645 |
| C | 3.525815  | 0.447382  | 1.483972  |
| C | 5.029370  | 0.347342  | 1.771207  |
| C | 3.368270  | -0.341636 | -0.877595 |
| C | 5.889803  | 1.106817  | 0.756334  |
| C | 4.282134  | 0.804715  | -1.254235 |
| C | 5.716516  | 0.668841  | -0.702093 |
| H | 3.265592  | 1.474415  | 1.206684  |
| H | 5.313534  | -0.712747 | 1.802690  |
| H | 5.645914  | 2.176081  | 0.829365  |
| H | 3.850292  | 1.761022  | -0.932724 |
| H | 2.954640  | 0.220449  | 2.387710  |
| H | 5.219707  | 0.756031  | 2.771233  |

|   |          |           |           |   |          |           |           |
|---|----------|-----------|-----------|---|----------|-----------|-----------|
| H | 6.946606 | 1.010779  | 1.034130  | H | 3.042859 | -2.041808 | 1.846307  |
| H | 4.307975 | 0.813098  | -2.345821 | H | 3.532944 | -3.220273 | -0.188471 |
| H | 6.379116 | 1.280040  | -1.325878 | H | 1.861663 | -3.653699 | 0.198421  |
| H | 6.047638 | -0.370595 | -0.825587 | H | 1.050011 | -1.887018 | -1.379807 |
| C | 2.513468 | -2.826708 | -0.098557 | H | 2.127410 | -2.991296 | -2.229854 |
| C | 2.471995 | -1.735653 | 0.962255  | N | 2.959743 | -1.118560 | -1.830418 |
| C | 2.094620 | -2.229644 | -1.442058 | N | 3.043992 | -0.478737 | 0.455392  |
| H | 1.438970 | -1.553871 | 1.286147  |   |          |           |           |

## 8. Reference

- (1) M. Ratushnyy, N. Kvasovs, S. Sarkar, V. Gevorgyan, Visible-Light-Induced Palladium-Catalyzed Generation of Aryl Radicals from Aryl Triflates. *Angew. Chem. Int. Ed.* **2020**, *59*, 10316-10320.
- (2) Berkeley; Hanna. N.M.R. STUDIES OF HYDROGEN BONDING. I. BINARY MIXTURES OF CHLOROFORM AND NITROGEN BASES<sup>1</sup>. *J. Physic. Chem.* **1963**, *67*, 846-849.
- (3) Hanna; Ashbaugh. Nuclear Magnetic Resonance Study of Molecular Complexes of 7,7,8,8-Tetracyanoquinodimethane and Aromatic Donors<sup>1,2</sup>. *J. Physic. Chem.* **1964**, *68*, 811-816.
- (4) Foster, R.; Fyfe, C. A. Interaction of electron acceptors with bases. Part 15.—Determination of association constants of organic charge-transfer complexes by n.m.r. spectroscopy. *Trans. Faraday Soc.* **1965**, *61*, 1626-1631.
- (5) Du, L.; Cao, P.; Xing, J.; Lou, Y.; Jiang, L.; Li, L.; Liao, J., Hydrogen-bond-promoted palladium catalysis: allylic alkylation of indoles with unsymmetrical 1,3-disubstituted allyl acetates using chiral bis(sulfoxide) phosphine ligands. *Angew. Chem. Int. Ed.* **2013**, *52*, 4207-4211;
- (6) Chen, K.-Q.; Zhang, B.-B.; Wang, Z.-X.; Chen, X.-Y. N-Heterocyclic Nitreniums Can Be Employed as Photoredox Catalysts for the Single-Electron Reduction of Aryl Halides. *Org. Lett.* **2022**, *24*, 25, 4598-4602.
- (7) Cheng, X.-F.; Wang, T.; Li, Y.; Wu, Y.; Sheng, J.; Wang, R.; Li, C.; Bian, K.-J.; Wang, X.-S. Palladium(II)-Catalyzed C(sp<sup>2</sup>)-H Carbonylation of Sterically Hindered Amines with Carbon Monoxide. *Org. Lett.* **2018**, *20*, 6530-6533.
- (8) Shen, J.-H.; You, Q.-H.; Fu, Q.; Kuai, C.-S.; Huang, H.-B.; Zhao, L.; Zhuang, Z.-X. Base-Promoted Cascade C-C Coupling/N- $\alpha$ -sp<sup>3</sup>C-H Hydroxylation for the Regiospecific Synthesis of 3-Hydroxyisoindolinones. *Org. Lett.* **2017**, *19*, 5170-5173.
- (9) Cybularczyk-Cecotka, M.; Predygier, J.; Crespi, S.; Szczepanik, J.; Giedyk, M. Photocatalysis in Aqueous Micellar Media Enables Divergent C-H Arylation and NDealkylation of Benzamides. *ACS Catal.* **2022**, *12*, 3543-354.
- (10) Chen, J.-Q.; Wei, Y.-L.; Xu, G.-Q.; Liang, Y.- M.; Xu, P.-F. Intramolecular 1,5-H transfer reaction of aryl iodides through visible-light photoredox catalysis: a concise method for the synthesis of natural product scaffolds. *Chem. Commun.* **2016**, *52*, 6455-6458.

- (11) Frisch MJ, Trucks GW, Schlegel HB, Scuseria GE, Robb MA, Cheeseman JR, Scalmani G, Barone V, Mennucci B, Petersson GA, Nakatsuji H, Caricato M, Li X, Hratchian HP, Izmaylov AF, Bloino J, Zheng G, Sonnenberg JL, Hada M, Ehara M, Toyota K, Fukuda R, Hasegawa J, Ishida M, Nakajima T, Honda Y, Kitao O, Nakai H, Vreven T, Montgomery JAJ, Peralta JE, Ogliaro F, Bearpark M, Heyd JJ, Brothers E, Kudin KN, Staroverov VN, Keith T, Kobayashi R, Normand J, Raghavachari K, Rendell A, Burant JC, Iyengar SS, Tomasi J, Cossi M, Rega N, Millam JM, Klene M, Knox JE, Cross JB, Bakken V, Adamo C, Jaramillo J, Gomperts R, Stratmann RE, Yazyev O, Austin AJ, Cammi R, Pomelli C, Ochterski JW, Martin RL, Morokuma K, Zakrzewski VG, Voth GA, Salvador P, Dannenberg JJ, Dapprich S, Daniels AD, Farkas O, Foresman JB, Ortiz JV, Cioslowski J, Fox DJ. Gaussian 16, Rev. A.03; Gaussian, Inc.: Wallingford, CT, 2016.
- (12) Stephens PJ, Devlin FJ, Chabalowski CF, Frisch MJ. *Phys. Chem.* **1994**, *98*: 11623–11627.
- (13) (a) Grimme S, Ehrlich J, Krieg SH. *J. Chem. Phys.* **2010**, *132*: 154104–154119. (b) Grimme S, Ehrlich S, Goerigk L. *J. Comput. Chem.* **2011**, *32*: 1456-1465.
- (14) Marenich AV, Cramer CJ, Truhlar DG. *J. Phys. Chem. B.* **2009**, *113*: 6378-6396.
- (15) (a) Dolg M, Wedig U, Stoll H, Preuss H. *J. Chem. Phys.* 1987, *86*: 866-872. (b) Andrae D, Häußermann U, Dolg M, Stoll H, Preuß H. *Theor. Chim. Acta.* **1990**, *77*: 123-141.
- (16) Legault CY. *CYLView, version 1.0 b*; Université de Sherbrooke: Sherbrooke, Quebec, Canada, 2009. <http://www.cylview.org>.
